# Supplementary material for: Single-cell landscape of immunocytes in patients with extrahepatic cholangiocarcinoma
Source: J Transl Med. 2022 May 13;20:210. doi: 10.1186/s12967-022-03424-5 (PMC9103331; doi:10.1186/s12967-022-03424-5)
Supplement: Supplementary file 4 — Additional file 4. Table S2. List of signature genes expressed in cell clusters. [file 12967_2022_3424_MOESM4_ESM.xlsx]

## Sheet: 1
Table S2. List of signature genes expressed in cell clusters
gene	p_val	p_val_adj	avg_logFC
CD79A	0	0	2.98315
MS4A1	0	0	2.34302
HLA-DQA2	0	0	1.83055
CD74	0	0	1.74704
HLA-DRB5	0	0	1.72803
BANK1	0	0	1.72312
CD83	0	0	1.7107
LINC00926	0	0	1.65032
LY9	0	0	1.64647
HLA-DRA	0	0	1.62133
FCER2	0	0	1.35677
ADAM28	0	0	1.28619
CD37	0	0	1.27392
SNX9	0	0	1.24754
HLA-DPB1	0	0	1.24118
CD19	0	0	1.23712
AFF3	0	0	1.17825
FAM129C	0	0	1.17694
LAPTM5	0	0	1.16746
HLA-DQB1	0	0	1.15531
HLA-DPA1	0	0	1.13615
BLK	0	0	1.13585
MEF2C	0	0	1.1204
CD55	0	0	1.11603
TCL1A	0	0	1.1074
FCMR	0	0	1.07247
STAG3	0	0	1.07067
HLA-DMA	0	0	1.06712
HLA-DQA1	0	0	1.047
BACH2	0	0	1.04166
TNFRSF13C	0	0	1.02962
IGHM	0	0	1.00884
CD79B	0	0	0.994164
VPREB3	0	0	0.988875
EZR	0	0	0.988756
RALGPS2	0	0	0.988704
IGHD	0	0	0.956941
FCRL1	0	0	0.956579
IRF8	0	0	0.942465
2021-03-01	0	0	0.93165
FCRLA	0	0	0.908264
LYN	0	0	0.908234
BTG1	0	0	0.90462
ANKRD44	0	0	0.902149
CD22	0	0	0.899526
CXCR4	0	0	0.886995
RUBCNL	0	0	0.870624
SWAP70	0	0	0.868942
SNX2	0	0	0.848462
MGAT5	0	0	0.848405
EIF1AY	0	0	0.840362
SIDT1	0	0	0.840272
HLA-DOB	0	0	0.815759
ZNF318	0	0	0.811963
BCL11A	0	0	0.797871
CD72	0	0	0.796729
HLA-DMB	0	0	0.792404
TCF4	0	0	0.774849
AC119396.1	0	0	0.769411
HVCN1	0	0	0.765884
ARHGAP24	0	0	0.759875
COL19A1	0	0	0.741655
GNG7	0	0	0.730395
RPL18A	0	0	0.729464
HLA-DRB1	0	0	0.711017
LINC02397	0	0	0.69497
PLEKHG1	0	0	0.688349
CXCR5	0	0	0.687163
PAX5	0	0	0.67985
STAP1	0	0	0.679163
HLA-DOA	0	0	0.675394
CD40	0	0	0.673814
RPS5	0	0	0.660088
POU2AF1	0	0	0.629615
RPS19	0	0	0.619445
RPS23	0	0	0.512941
RPL8	2.69761e-307	9.04723e-303	0.459946
RPS8	2.39773e-306	8.0415e-302	0.473402
CD69	3.42011e-305	1.14704e-300	1.13
TXNIP	3.11899e-304	1.04605e-299	0.886245
RAB30	1.50423e-300	5.0449e-296	0.617545
SP100	6.82872e-300	2.29022e-295	0.801849
SYNGR2	1.42887e-297	4.79214e-293	0.860081
PARP15	5.97208e-291	2.00292e-286	0.680586
RPL12	1.66436e-289	5.58195e-285	0.474435
RPL13	1.67765e-277	5.62651e-273	0.454295
IFT57	2.49551e-272	8.36945e-268	0.8197
SMIM14	1.48528e-271	4.98134e-267	0.847648
RPS4Y1	1.29937e-269	4.35783e-265	0.71273
RPSA	3.82328e-269	1.28225e-264	0.581685
RHOH	2.78008e-268	9.32382e-264	0.815404
BTK	7.06694e-266	2.37011e-261	0.548299
TSC22D3	8.05292e-263	2.70079e-258	0.73262
RPS11	2.8814e-262	9.66364e-258	0.57832
RPL21	5.37318e-262	1.80206e-257	0.485114
RCSD1	5.79096e-260	1.94217e-255	0.769995
RPL10A	5.69261e-258	1.90919e-253	0.51924
SMCHD1	1.0222e-255	3.42826e-251	0.732554
CD52	1.98291e-254	6.65027e-250	0.645115
MT-ND4L	3.59221e-253	1.20475e-248	0.479461
POU2F2	5.12044e-252	1.71729e-247	0.689887
RPS18	5.20173e-248	1.74456e-243	0.490614
TRAF5	1.09098e-242	3.65893e-238	0.678975
CHPT1	7.724e-242	2.59047e-237	0.642987
TMEM243	1.2504e-240	4.1936e-236	0.745026
AC007384.1	1.26745e-238	4.25078e-234	0.661064
RPL18	7.71593e-237	2.58777e-232	0.410665
RPL32	7.91783e-237	2.65548e-232	0.390713
TMEM123	1.54721e-233	5.18905e-229	0.925307
COBLL1	4.39008e-233	1.47234e-228	0.57397
TLE1	8.97899e-231	3.01137e-226	0.609425
EBF1	1.7817e-229	5.97547e-225	0.55072
RRM2B	6.01142e-226	2.01611e-221	0.598356
BIRC3	1.45835e-224	4.89101e-220	0.857957
RASGEF1B	4.76484e-223	1.59803e-218	0.768927
RPL29	2.54851e-219	8.54718e-215	0.397527
EEF1B2	1.63571e-218	5.48584e-214	0.50504
SSH2	3.61358e-216	1.21192e-211	0.713086
REL	1.02468e-213	3.43658e-209	0.710848
RPS6	1.0201e-212	3.42121e-208	0.426999
YBX3	1.66585e-212	5.58691e-208	0.861825
SP140L	1.81548e-212	6.08875e-208	0.643951
WASHC4	1.91513e-212	6.42298e-208	0.608952
DAPP1	4.21093e-211	1.41226e-206	0.5026
TAF1D	3.31509e-210	1.11181e-205	0.761753
MT-ATP6	1.18248e-208	3.96579e-204	0.4123
RPL9	4.39856e-206	1.47519e-201	0.409462
ORAI2	1.35797e-204	4.55437e-200	0.571678
PLCG2	1.3504e-203	4.52896e-199	0.545031
RPL41	7.81456e-202	2.62085e-197	0.317151
NCF1	1.64736e-201	5.52491e-197	0.385197
PDE4B	6.02265e-201	2.01987e-196	0.688902
MALAT1	7.79013e-199	2.61265e-194	0.386593
MTSS1	2.4574e-197	8.24163e-193	0.638299
KDM4B	5.92834e-195	1.98825e-190	0.596975
IL16	8.13819e-195	2.72938e-190	0.62247
ATF7IP	3.59179e-194	1.20461e-189	0.739424
INPP5D	1.02387e-192	3.43385e-188	0.624712
LY86	1.86448e-192	6.25309e-188	0.499027
SNX29	3.27796e-191	1.09936e-186	0.592158
RPL15	3.42595e-191	1.14899e-186	0.391086
RNASE6	2.97151e-190	9.96583e-186	0.556848
TMEM131L	1.45414e-189	4.87688e-185	0.61401
PPM1K	8.4648e-185	2.83892e-180	0.610368
TPD52	1.92526e-184	6.45695e-180	0.579887
RPL13A	3.27956e-184	1.0999e-179	0.459226
LSM7	1.19216e-181	3.99825e-177	0.712271
YPEL5	3.27786e-181	1.09933e-176	0.682924
UVRAG	8.261e-179	2.77057e-174	0.63917
LTB	3.58049e-178	1.20082e-173	0.438508
PRDM2	3.80868e-174	1.27735e-169	0.638957
SP140	5.0593e-174	1.69679e-169	0.58384
BCAS4	1.55693e-172	5.22164e-168	0.477627
STK17A	2.08651e-170	6.99774e-166	0.620545
DRAM2	8.87498e-170	2.97649e-165	0.572027
RPS27A	2.28864e-169	7.67564e-165	0.320797
TMEM156	1.11202e-168	3.72949e-164	0.514123
ELF1	4.91789e-167	1.64936e-162	0.638739
RPL35	4.75429e-166	1.59449e-161	0.404096
RPL19	3.99175e-165	1.33875e-160	0.307417
RPS27	2.26912e-164	7.61019e-160	0.385458
PHACTR1	3.15769e-164	1.05903e-159	0.498719
MT-CO1	1.40839e-163	4.72345e-159	0.341292
PKIG	2.76645e-162	9.27812e-158	0.504687
VPS37B	7.99035e-162	2.6798e-157	0.735884
BACH1	1.69896e-159	5.69799e-155	0.579298
FCHSD2	6.1946e-158	2.07755e-153	0.460226
FAU	2.9344e-156	9.8414e-152	0.285495
RPS15	9.51629e-156	3.19157e-151	0.318166
WDR74	1.13566e-155	3.80879e-151	0.626619
RPL39	3.36095e-153	1.1272e-148	0.296165
SEL1L3	7.88174e-153	2.64338e-148	0.478573
MANBA	4.86982e-152	1.63324e-147	0.609038
TSPAN13	7.79147e-152	2.6131e-147	0.411065
PDE7A	2.04153e-151	6.84689e-147	0.522248
NCOA3	6.83896e-151	2.29365e-146	0.546865
RPL23A	3.21048e-149	1.07673e-144	0.367478
ST6GAL1	4.40179e-149	1.47627e-144	0.523172
RPL30	7.87294e-148	2.64043e-143	0.284566
SLC44A2	2.13342e-146	7.15505e-142	0.528628
GRASP	7.17246e-146	2.4055e-141	0.587095
SESN3	8.90682e-146	2.98717e-141	0.504682
TMEM154	2.03431e-145	6.82267e-141	0.305477
AP1B1	6.16445e-144	2.06743e-139	0.503294
RPS25	1.01072e-143	3.38977e-139	0.326755
SESN1	5.43746e-143	1.82362e-138	0.649329
IL4R	1.72359e-141	5.78057e-137	0.655174
CD53	3.78708e-140	1.27011e-135	0.51108
HIF1A	3.15777e-138	1.05905e-133	0.48941
EBLN3P	1.22677e-136	4.11435e-132	0.552429
RPLP2	2.2544e-135	7.5608e-131	0.316141
PIKFYVE	2.49466e-135	8.36658e-131	0.499187
RPL11	7.29384e-134	2.44621e-129	0.271224
ITPR1	2.79302e-133	9.36723e-129	0.49846
MT-CO2	1.90247e-131	6.38049e-127	0.262062
RNMT	2.97576e-131	9.9801e-127	0.541558
NOP53	4.26169e-130	1.42929e-125	0.465662
ZCCHC7	4.55886e-130	1.52895e-125	0.521114
YWHAZ	1.06719e-128	3.57914e-124	0.424005
CYBB	9.20104e-128	3.08585e-123	0.256891
STK4	1.04727e-126	3.51233e-122	0.478335
RBM39	2.62342e-126	8.79844e-122	0.474608
CMTM6	4.20066e-126	1.40882e-121	0.501227
RPS2	4.76365e-126	1.59763e-121	0.318872
USP8	3.81651e-125	1.27998e-120	0.506147
RPL28	4.81359e-125	1.61438e-120	0.26023
CAMK2D	2.31882e-124	7.77687e-120	0.523368
TRIM22	2.93007e-124	9.82687e-120	0.531939
SMAP2	1.11144e-123	3.72755e-119	0.451774
RPL22L1	2.31536e-123	7.76526e-119	0.541164
SKIL	2.91073e-123	9.76199e-119	0.564228
SF1	3.10917e-122	1.04275e-117	0.440559
PNISR	1.105e-121	3.70594e-117	0.529852
STX7	1.69631e-121	5.68909e-117	0.460726
ZNF10	2.64573e-120	8.87325e-116	0.554997
RPL10	5.0383e-120	1.68974e-115	0.258723
CCR7	8.5289e-120	2.86042e-115	0.466538
KIAA1551	1.03572e-118	3.47361e-114	0.419791
RPLP0	6.04151e-118	2.0262e-113	0.310927
GGA2	8.94311e-117	2.99934e-112	0.459984
MYCBP2	1.07355e-116	3.60046e-112	0.522559
PARVB	1.42276e-116	4.77164e-112	0.445862
ARRDC2	1.42947e-116	4.79415e-112	0.545103
NBPF10	1.89033e-116	6.33979e-112	0.48102
ZFAS1	4.61835e-116	1.5489e-111	0.510282
RPL5	4.76483e-116	1.59803e-111	0.292808
ALG13	1.29847e-115	4.35482e-111	0.739654
KMT2E	1.67672e-114	5.62339e-110	0.479973
EEF2	3.85002e-114	1.29122e-109	0.336537
VCPKMT	7.29965e-114	2.44816e-109	0.506643
POLD4	7.13551e-113	2.39311e-108	0.521887
RPS9	9.66138e-113	3.24023e-108	0.295345
RPL7A	1.79944e-110	6.03495e-106	0.265397
NGLY1	5.20204e-110	1.74466e-105	0.497273
RPL27A	5.84208e-110	1.95932e-105	0.402219
ISG20	9.83924e-110	3.29988e-105	0.425274
JUN	1.83613e-109	6.15801e-105	0.600907
GNB5	3.55288e-109	1.19157e-104	0.492739
AC016831.7	2.34972e-108	7.88049e-104	0.468312
PARP1	2.51791e-107	8.44457e-103	0.464607
RPS21	5.77747e-106	1.93765e-101	0.270308
RCN2	1.191e-105	3.99437e-101	0.465705
RPL27	7.45183e-103	2.4992e-98	0.33041
PARP14	9.67764e-102	3.24569e-97	0.44519
MT-ND3	2.2344e-101	7.49374e-97	0.300127
MT-ATP8	3.16565e-101	1.0617e-96	0.351914
DMXL1	3.37352e-100	1.13141e-95	0.449225
ITSN2	5.65142e-100	1.89537e-95	0.444345
SP110	3.43554e-99	1.15221e-94	0.424701
CAMK1D	4.78613e-99	1.60517e-94	0.387573
RPS20	8.78503e-99	2.94632e-94	0.387943
GPBP1	1.11374e-98	3.73527e-94	0.432942
SYK	1.65686e-98	5.55676e-94	0.340219
RPL4	1.8477e-98	6.19682e-94	0.319644
NR4A2	5.08836e-98	1.70653e-93	0.598891
TUT4	5.66467e-97	1.89982e-92	0.462978
ZNF331	2.40615e-95	8.06976e-91	0.608291
DDX3Y	3.21013e-95	1.07661e-90	0.42262
PTMA	4.89121e-95	1.64041e-90	0.276992
SNHG8	7.29329e-95	2.44603e-90	0.535441
ODC1	7.96419e-95	2.67103e-90	0.428276
NBPF14	6.56244e-94	2.20091e-89	0.504193
TP53INP1	5.41298e-93	1.81541e-88	0.407666
ARL4A	3.48275e-92	1.16805e-87	0.479745
RIC1	5.54214e-92	1.85872e-87	0.453622
RFTN1	2.74935e-90	9.22077e-86	0.455937
ZFP36L2	2.9203e-90	9.79409e-86	0.310069
USP12	3.7317e-89	1.25154e-84	0.451117
CEMIP2	8.16904e-89	2.73973e-84	0.578044
NCL	9.28738e-88	3.1148e-83	0.369461
DGKD	1.75638e-87	5.89053e-83	0.416572
PTPN1	2.09244e-87	7.01763e-83	0.467468
PIK3IP1	2.97226e-87	9.96837e-83	0.452633
CNPPD1	1.17585e-86	3.94355e-82	0.395006
P2RY10	1.5976e-86	5.35803e-82	0.438399
ARID5B	2.95278e-86	9.90303e-82	0.415746
RACK1	4.26631e-85	1.43083e-80	0.271019
RASGRP2	2.19092e-84	7.34791e-80	0.38115
SETX	3.32424e-84	1.11488e-79	0.400976
CCDC6	7.20223e-84	2.41548e-79	0.387268
PTPRCAP	2.66037e-83	8.92234e-79	0.346238
RLF	2.33535e-81	7.83229e-77	0.439409
MDM4	2.63954e-81	8.85247e-77	0.385011
SF3B1	3.4787e-81	1.16669e-76	0.384017
ZBTB16	4.3372e-81	1.45461e-76	0.435069
FOXP1	4.37343e-81	1.46676e-76	0.428309
TAF7	4.43355e-81	1.48692e-76	0.403758
CNTRL	1.1082e-80	3.71668e-76	0.408372
TSPAN3	1.68454e-80	5.64961e-76	0.367964
MT-ND5	7.3601e-80	2.46843e-75	0.28857
RPS16	1.31102e-79	4.39688e-75	0.260945
CYTIP	1.43409e-78	4.80965e-74	0.349777
BORCS5	6.0173e-78	2.01808e-73	0.403021
EEF1G	1.65332e-77	5.54492e-73	0.334363
ATP2A3	2.68027e-77	8.98908e-73	0.378215
JAZF1	3.25682e-77	1.09227e-72	0.386684
NOTCH2	3.64299e-76	1.22179e-71	0.342333
ADK	4.2681e-75	1.43144e-70	0.413682
BCLAF1	5.09976e-75	1.71036e-70	0.376661
CTSH	5.18417e-74	1.73867e-69	0.311649
SLC38A1	7.68917e-74	2.57879e-69	0.406881
SCPEP1	1.27805e-73	4.28632e-69	0.392368
CIRBP	3.27815e-73	1.09943e-68	0.28678
PWP1	2.99853e-72	1.00565e-67	0.404634
DENND4A	1.37924e-71	4.62568e-67	0.413662
LAT2	2.24869e-71	7.54165e-67	0.316594
ATF7IP2	1.69398e-70	5.68125e-66	0.372511
DUSP1	1.36163e-69	4.56663e-65	0.419966
SNHG7	1.57866e-69	5.2945e-65	0.407998
MEF2A	2.86254e-69	9.60038e-65	0.33124
TENT5C	1.04195e-68	3.49449e-64	0.408016
KDM6B	1.07033e-68	3.58967e-64	0.396461
FUS	5.41682e-68	1.81669e-63	0.304503
PHF20	1.56802e-67	5.25882e-63	0.384347
GLO1	3.30811e-67	1.10947e-62	0.364618
KDM4C	1.2239e-66	4.10472e-62	0.351382
SC5D	2.17869e-66	7.30688e-62	0.392808
ARHGAP15	5.11155e-66	1.71431e-61	0.319674
UTRN	8.07023e-65	2.70659e-60	0.374902
RAB3GAP1	2.10557e-64	7.06167e-60	0.355307
ATP2B1	5.44739e-64	1.82695e-59	0.338294
CD82	6.9834e-64	2.34209e-59	0.364851
HNRNPK	1.32361e-63	4.43911e-59	0.288188
MT-ND6	4.9742e-63	1.66825e-58	0.283362
SRSF7	9.04812e-63	3.03456e-58	0.287437
2021-09-07	9.03105e-62	3.02883e-57	0.299512
SFPQ	1.7622e-61	5.91006e-57	0.330138
MAPK1IP1L	2.01591e-61	6.76098e-57	0.3292
TNFAIP8	7.93502e-61	2.66125e-56	0.380326
HERPUD1	7.99127e-61	2.68011e-56	0.335757
ZBTB20	3.36707e-60	1.12925e-55	0.391939
KLHL24	1.78351e-59	5.98152e-55	0.360998
PHF3	6.70032e-59	2.24715e-54	0.332781
SASH3	8.62036e-59	2.8911e-54	0.299123
PIAS1	2.8051e-58	9.40776e-54	0.351239
BCL2	3.85018e-58	1.29127e-53	0.339012
SLBP	8.99079e-58	3.01533e-53	0.353058
HNRNPA2B1	1.2674e-57	4.2506e-53	0.256997
EIF1B	1.39902e-57	4.69205e-53	0.354377
SYPL1	1.4589e-56	4.89285e-52	0.359928
LDLRAD4	4.13943e-56	1.38828e-51	0.3154
CHD2	5.14547e-56	1.72569e-51	0.363277
N4BP2L2	5.81267e-56	1.94945e-51	0.315794
SRRM1	2.75827e-55	9.25067e-51	0.29342
EIF4A2	2.86484e-55	9.60811e-51	0.29596
RNF138	2.89415e-55	9.70639e-51	0.369501
MED30	5.15761e-55	1.72976e-50	0.327843
TRA2A	2.98505e-54	1.00112e-49	0.319447
SNHG12	1.26208e-53	4.23276e-49	0.409446
SH3BP5	1.32556e-53	4.44566e-49	0.31538
BOD1L1	2.01298e-53	6.75115e-49	0.295393
HNRNPDL	2.834e-53	9.50468e-49	0.257342
DCK	3.73876e-53	1.2539e-48	0.286234
APPL1	7.88061e-53	2.643e-48	0.344572
NSD3	7.88354e-53	2.64398e-48	0.336457
EIF3E	3.06835e-52	1.02906e-47	0.256078
RB1	6.81911e-52	2.28699e-47	0.325789
TAGAP	1.87672e-51	6.29414e-47	0.282843
2021-09-09	2.09572e-51	7.02863e-47	0.274396
EPC1	2.44377e-51	8.1959e-47	0.285769
MIS18BP1	4.70916e-51	1.57936e-46	0.309407
FNBP4	8.50711e-51	2.85312e-46	0.354449
RBM25	1.73686e-50	5.82507e-46	0.309555
LMBRD1	2.53231e-50	8.49285e-46	0.318444
CHD9	2.75592e-50	9.24281e-46	0.325508
ERAP2	8.86725e-50	2.9739e-45	0.332082
ARGLU1	8.89338e-50	2.98266e-45	0.310625
SECISBP2L	1.95294e-49	6.54978e-45	0.327307
SMDT1	5.57153e-49	1.86858e-44	0.289673
BPTF	1.12749e-47	3.78138e-43	0.319887
TNRC6B	2.20003e-47	7.37845e-43	0.266309
PRRC2C	4.43071e-47	1.48597e-42	0.300748
SMC5	5.56891e-47	1.8677e-42	0.33179
NIPBL	6.55854e-47	2.1996e-42	0.296297
SRSF10	1.71905e-46	5.76533e-42	0.304138
MAP3K8	9.32595e-46	3.12774e-41	0.267684
RSRC2	1.32578e-45	4.44641e-41	0.343556
STAT6	1.41269e-45	4.73787e-41	0.269097
TTC3	1.23995e-44	4.15853e-40	0.345812
ZNF292	4.00623e-44	1.34361e-39	0.292932
NT5C	4.94553e-44	1.65863e-39	0.307059
KPNB1	7.63994e-44	2.56228e-39	0.291904
DDX39A	2.73617e-43	9.17655e-39	0.311123
ZMYM2	5.98547e-43	2.00741e-38	0.306095
OGA	6.18576e-43	2.07458e-38	0.296978
STX5	3.0263e-42	1.01496e-37	0.303574
RARA	4.6262e-42	1.55154e-37	0.300697
JMJD1C	5.31565e-42	1.78276e-37	0.251845
TTC17	1.00239e-41	3.36181e-37	0.306458
TCERG1	1.92035e-41	6.44046e-37	0.310009
PMAIP1	2.77741e-41	9.31486e-37	0.335373
C7orf50	5.85153e-41	1.96249e-36	0.306096
IDS	2.11388e-40	7.08953e-36	0.282298
ASH1L	3.03456e-40	1.01773e-35	0.312146
TMC8	3.08924e-40	1.03607e-35	0.276679
TLK1	3.8478e-40	1.29048e-35	0.273411
ZNF644	5.4096e-40	1.81427e-35	0.285074
IDI1	5.66234e-40	1.89904e-35	0.326533
BRAF	7.03832e-40	2.36051e-35	0.26729
BDP1	8.66987e-40	2.9077e-35	0.31781
FAM13B	1.81253e-39	6.07887e-35	0.282313
PRPF38B	4.72751e-39	1.58551e-34	0.298745
NEMF	5.34232e-39	1.79171e-34	0.289103
CENPC	5.44655e-39	1.82666e-34	0.296608
NIN	9.45172e-39	3.16992e-34	0.2636
GCC2	1.91867e-38	6.43484e-34	0.269728
TBRG1	3.9715e-38	1.33196e-33	0.259332
ATRX	5.26181e-38	1.76471e-33	0.296023
RPA2	1.32022e-37	4.42777e-33	0.254137
PPP4R3A	1.58317e-37	5.30964e-33	0.2866
LBR	4.90398e-37	1.6447e-32	0.266351
MATR3.2	5.36914e-37	1.8007e-32	0.261429
SLC25A32	6.61137e-37	2.21732e-32	0.286859
NR1H2	1.05271e-35	3.53058e-31	0.277105
HSPA4	4.28663e-35	1.43765e-30	0.266556
RAB8B	2.12675e-34	7.13268e-30	0.251691
PLPP5	5.24446e-34	1.75889e-29	0.286034
PRPF4B	8.29326e-34	2.78139e-29	0.270207
KRR1	8.48929e-34	2.84714e-29	0.263377
PTK2B	2.05535e-33	6.89323e-29	0.254369
UCP2	5.25206e-33	1.76144e-28	0.26721
RSRP1	5.33519e-33	1.78932e-28	0.273956
SNX5	7.6974e-33	2.58155e-28	0.274249
RBM6	8.53801e-33	2.86348e-28	0.273125
PNN	1.01674e-32	3.40993e-28	0.268288
PTP4A1	1.28259e-32	4.30156e-28	0.293183
SMARCA5	2.74335e-31	9.20066e-27	0.262606
THOC2	4.48801e-31	1.50519e-26	0.271764
BBX	5.72384e-31	1.91966e-26	0.275942
RSL24D1	1.29297e-30	4.33637e-26	0.267002
TMF1	1.16858e-28	3.91919e-24	0.255086
SMNDC1	7.67799e-28	2.57504e-23	0.254417
SNRPA1	9.69545e-28	3.25166e-23	0.255994
CHMP1B	6.9064e-27	2.31627e-22	0.424246

## Sheet: 2
gene	p_val	p_val_adj	avg_logFC
IL7R	0	0	1.51339
CRYBG1	0	0	1.20156
SARAF	0	0	1.06922
FAAH2	0	0	0.884766
ITK	5.42209e-305	1.81846e-300	0.946296
CAMK4	6.17097e-282	2.06962e-277	0.79307
ICOS	3.71727e-264	1.2467e-259	0.792128
LEPROTL1	1.98677e-258	6.66322e-254	0.931909
CD28	9.97963e-256	3.34697e-251	0.692416
SPOCK2	1.80954e-244	6.06883e-240	0.887497
CCR4	2.4846e-241	8.33287e-237	0.587075
CCR7	1.49314e-224	5.00769e-220	1.00369
CD3E	1.08842e-221	3.65034e-217	0.746095
PTGER4	3.22092e-221	1.08023e-216	0.851518
CD2	2.51298e-218	8.42803e-214	0.901867
RNF125	1.8532e-217	6.21527e-213	0.821861
CCR6	1.65575e-215	5.55307e-211	0.846036
LEF1	4.26957e-215	1.43193e-210	0.643374
PDE3B	5.14559e-214	1.72573e-209	0.734848
PABPC1	1.03208e-211	3.46138e-207	0.730906
TNFAIP3	1.88118e-207	6.30911e-203	0.931263
RPS12	5.88401e-206	1.97338e-201	0.541646
ARID5A	2.61758e-204	8.77882e-200	0.875919
PBX4	3.43401e-200	1.1517e-195	0.611533
EEF1A1	1.76232e-198	5.91048e-194	0.472595
FAM177A1	2.68974e-197	9.02085e-193	0.790086
CREM	1.22347e-190	4.10328e-186	0.845022
RORA	5.15908e-185	1.73025e-180	0.792349
TPT1	1.14023e-183	3.82409e-179	0.478486
AP3M2	1.02416e-180	3.43484e-176	0.595666
RPL32	6.76696e-180	2.2695e-175	0.488591
SLC2A3	7.41771e-179	2.48775e-174	0.800965
RGCC	3.41966e-177	1.14689e-172	0.900464
RPS15A	3.13517e-176	1.05147e-171	0.446284
PDCD4	4.94108e-175	1.65714e-170	0.720223
RPL13	3.01861e-172	1.01238e-167	0.473071
GPR183	1.0565e-170	3.54329e-166	0.605138
RPS3	7.12532e-169	2.38969e-164	0.458181
PGAP1	3.62339e-168	1.21521e-163	0.715153
CD3D	4.0254e-167	1.35004e-162	0.574418
RPL30	4.81904e-165	1.61621e-160	0.435228
RPS18	6.31808e-164	2.11896e-159	0.525558
CNOT6L	2.75447e-162	9.23796e-158	0.705609
INPP4B	7.49015e-161	2.51205e-156	0.544156
YPEL5	7.95076e-160	2.66653e-155	0.750268
RPS6	4.37319e-159	1.46668e-154	0.517508
IPCEF1	1.87474e-158	6.2875e-154	0.612631
GPRIN3	5.36413e-156	1.79902e-151	0.60407
RPS25	4.69711e-155	1.57532e-150	0.474093
CD96	5.41261e-155	1.81528e-150	0.635087
RPL10	1.4738e-154	4.94285e-150	0.420532
RPS4Y1	4.19341e-154	1.40639e-149	0.786719
LDHB	1.47505e-153	4.94701e-149	0.675563
STAT4	9.06862e-153	3.04143e-148	0.643714
CD7	4.80334e-150	1.61094e-145	0.462419
PIK3R1	1.16132e-148	3.89483e-144	0.683438
RPLP1	7.82417e-148	2.62407e-143	0.407611
SC5D	3.59701e-147	1.20636e-142	0.680153
RPS14	1.15992e-145	3.89013e-141	0.414048
CD6	7.47856e-145	2.50816e-140	0.602379
RPL28	4.5789e-144	1.53567e-139	0.3547
SYTL3	2.08703e-143	6.99948e-139	0.599197
TNFSF8	5.35002e-143	1.79429e-138	0.590663
TSC22D3	1.03903e-142	3.4847e-138	0.685656
RPS27A	9.24581e-142	3.10086e-137	0.394421
RPL41	1.05682e-141	3.54436e-137	0.339393
FYB1	8.89514e-140	2.98325e-135	0.601352
RPL34	1.31012e-137	4.3939e-133	0.384902
CYTIP	6.16896e-137	2.06895e-132	0.660387
TRAT1	7.93604e-137	2.66159e-132	0.526667
ZFP36L2	2.88967e-136	9.69138e-132	0.755846
RPL9	1.22092e-135	4.09471e-131	0.450309
ITM2A	2.33941e-132	7.84592e-128	0.617263
KLRB1	4.24767e-130	1.42458e-125	0.845362
SCML1	8.12925e-130	2.72639e-125	0.562473
NDFIP1	1.7118e-129	5.74103e-125	0.683107
DNAJB1	2.57852e-128	8.64784e-124	0.403465
ARL4C	2.8008e-128	9.39333e-124	0.631616
BCL11B	2.92788e-127	9.81952e-123	0.48137
RPS27	9.90893e-127	3.32326e-122	0.453182
SATB1	1.19035e-126	3.99221e-122	0.655849
TOB1	1.35851e-126	4.55617e-122	0.863312
ABLIM1	1.81603e-126	6.09062e-122	0.645911
ARHGDIB	7.42373e-126	2.48977e-121	0.560752
ZNF831	1.56133e-122	5.23637e-118	0.489729
GPR171	2.41267e-120	8.09163e-116	0.642406
RPL36	2.84743e-120	9.5497e-116	0.396527
SRGN	5.91817e-119	1.98483e-114	0.523297
IKZF1	3.20354e-118	1.0744e-113	0.540963
RPL14	5.64947e-118	1.89472e-113	0.394949
PIK3IP1	8.22478e-117	2.75843e-112	0.548982
BTG1	1.27031e-115	4.26037e-111	0.486167
RPL39	3.18885e-115	1.06948e-110	0.351379
ZNF331	1.11934e-114	3.75406e-110	0.589508
UGP2	2.43149e-114	8.15474e-110	0.655901
RPS8	3.13527e-114	1.05151e-109	0.381446
FXYD5	1.46344e-113	4.90808e-109	0.495623
EML4	2.75495e-113	9.23956e-109	0.57676
RPL11	1.57826e-112	5.29316e-108	0.340883
EIF1	3.90487e-112	1.30962e-107	0.37145
EEF1B2	1.46371e-109	4.90901e-105	0.466297
SFXN1	3.48269e-109	1.16802e-104	0.54586
MAL	4.72494e-109	1.58465e-104	0.404101
TAF4B	5.65404e-108	1.89625e-103	0.46863
RPL19	2.51173e-107	8.42385e-103	0.332583
LPAR2	6.07942e-107	2.03892e-102	0.367426
LTB	7.48366e-106	2.50987e-101	0.485474
PTPRC	3.46625e-105	1.16251e-100	0.466982
LDHA	7.74561e-105	2.59772e-100	0.481312
EZR	2.53442e-104	8.49994e-100	0.573214
DDIT4	2.8981e-104	9.71964e-100	0.647136
RPSA	4.22838e-104	1.41811e-99	0.435397
TXK	4.95576e-104	1.66206e-99	0.449433
RPL4	1.74211e-103	5.84268e-99	0.456715
ETS1	8.40207e-103	2.81789e-98	0.516929
PBXIP1	3.11586e-102	1.045e-97	0.520069
RPL37	3.51169e-102	1.17775e-97	0.34247
PRKCH	4.5623e-100	1.5301e-95	0.453288
SMCHD1	5.03295e-99	1.68795e-94	0.472833
ZC3HAV1	5.96971e-99	2.00212e-94	0.506837
RPL5	6.81028e-99	2.28403e-94	0.380217
CDC14A	7.38317e-99	2.47617e-94	0.462187
RPLP2	2.1702e-98	7.27843e-94	0.331977
RPS28	6.66851e-98	2.23649e-93	0.308223
OXNAD1	1.41726e-97	4.7532e-93	0.448952
ANXA1	1.84354e-97	6.18288e-93	0.818367
SRSF7	8.82804e-97	2.96075e-92	0.508241
CD3G	1.65831e-96	5.56164e-92	0.384886
SESN3	1.95849e-96	6.56839e-92	0.63238
RPL10A	5.12213e-96	1.71786e-91	0.396516
RPL35A	7.37385e-96	2.47304e-91	0.318689
CYCS	1.20449e-95	4.03961e-91	0.677555
RPL18A	1.94905e-95	6.53674e-91	0.342914
RPL18	2.64181e-95	8.8601e-91	0.331375
RPL21	5.93777e-95	1.99141e-90	0.371396
RPS29	8.5583e-94	2.87028e-89	0.400837
AC016831.7	1.5699e-93	5.26512e-89	0.554305
RPS16	2.88114e-93	9.66276e-89	0.362897
ELF1	1.61758e-92	5.42504e-88	0.459705
P2RY10	1.14115e-90	3.82718e-86	0.418229
SH2D2A	2.32302e-90	7.79095e-86	0.416044
FYN	7.59739e-90	2.54801e-85	0.458064
RPL3	8.94833e-90	3.00109e-85	0.360744
TCF7	1.22511e-89	4.10879e-85	0.305174
JMJD1C	3.70732e-89	1.24336e-84	0.577851
RPL38	5.06688e-89	1.69933e-84	0.411432
MALAT1	5.42768e-88	1.82034e-83	0.365053
RPS3A	7.65932e-88	2.56878e-83	0.305132
NPM1	1.09522e-87	3.67316e-83	0.417529
CSRNP1	1.6106e-87	5.40164e-83	0.49159
RPL29	4.3668e-87	1.46454e-82	0.317458
PDE4D	3.69377e-86	1.23882e-81	0.499501
ANKRD12	5.03871e-86	1.68988e-81	0.562588
CD5	1.35265e-84	4.53652e-80	0.430336
PPP1CB	1.49894e-84	5.02713e-80	0.486513
FKBP5	2.77177e-84	9.29595e-80	0.449816
RPS19	4.47041e-83	1.49929e-78	0.351118
GSPT1	7.59885e-83	2.5485e-78	0.520538
RPL12	8.88318e-83	2.97924e-78	0.304765
SYNE2	2.28364e-82	7.65886e-78	0.383794
STAT3	3.24871e-82	1.08955e-77	0.448009
RPS21	3.83148e-82	1.285e-77	0.317698
RPL27A	1.06275e-81	3.56426e-77	0.413186
RPS15	3.10345e-81	1.04084e-76	0.281618
RPS4X	1.20963e-80	4.05685e-76	0.295979
FLT3LG	1.19257e-79	3.99964e-75	0.380109
CELF2	2.63206e-79	8.8274e-75	0.476514
BATF	5.92273e-78	1.98637e-73	0.498388
HSPH1	3.1268e-77	1.04867e-72	0.47328
TC2N	3.62555e-77	1.21594e-72	0.360907
SF1	4.71705e-77	1.58201e-72	0.426552
GPR132	5.43908e-77	1.82416e-72	0.370077
TSHZ2	9.2624e-77	3.10642e-72	0.440257
PIM2	2.75267e-76	9.23189e-72	0.578664
SELL	2.79105e-76	9.36061e-72	0.608565
CCNH	4.08952e-76	1.37154e-71	0.478038
EVI2A	1.04631e-74	3.5091e-70	0.379348
RPS7	1.33593e-74	4.48045e-70	0.270621
CXCR4	1.48459e-74	4.97902e-70	0.39911
MGAT4A	1.53114e-74	5.13515e-70	0.455748
RGS1	1.97739e-74	6.63176e-70	0.507366
IDS	6.12875e-74	2.05546e-69	0.456539
RPLP0	1.18148e-73	3.96244e-69	0.319195
MBNL1	2.17855e-73	7.30641e-69	0.427362
MCUB	5.47469e-73	1.8361e-68	0.395967
STK17B	1.62337e-72	5.44447e-68	0.389493
TNIK	2.57371e-72	8.63173e-68	0.388148
DDX3Y	2.59691e-72	8.70953e-68	0.409527
ARHGAP15	4.45812e-72	1.49516e-67	0.418689
RPS5	4.82035e-72	1.61665e-67	0.311701
G3BP2	2.9432e-71	9.87089e-67	0.434803
CD4	2.8475e-70	9.54995e-66	0.346776
RNF19A	9.83592e-70	3.29877e-65	0.514165
RPL6	1.08824e-69	3.64973e-65	0.275892
RPL24	2.00383e-69	6.72044e-65	0.298399
WDR74	1.05123e-68	3.52562e-64	0.477767
GATA3	1.49192e-68	5.00361e-64	0.464492
FAS	2.27329e-68	7.62418e-64	0.422387
EIF3E	2.42851e-68	8.14474e-64	0.409535
MTHFD2	3.91844e-68	1.31417e-63	0.414214
ZAP70	9.72138e-68	3.26036e-63	0.297278
CD69	3.49815e-66	1.17321e-61	0.346282
PPP2R5C	4.82865e-66	1.61943e-61	0.345478
RPS23	5.70057e-66	1.91186e-61	0.261308
NOP53	6.68258e-66	2.2412e-61	0.392124
RPL23A	1.42905e-65	4.79273e-61	0.300903
EEF2	1.47399e-65	4.94345e-61	0.335103
CLEC2D	1.85551e-65	6.22301e-61	0.424649
NOP58	8.03491e-65	2.69475e-60	0.433394
USP36	8.60544e-65	2.88609e-60	0.41825
IFITM1	1.06006e-64	3.55523e-60	0.262327
PTMA	1.23741e-64	4.15001e-60	0.265356
RPL35	2.28159e-64	7.65199e-60	0.300072
FOXP1	2.75507e-64	9.23996e-60	0.44799
BAZ1A	9.27181e-64	3.10958e-59	0.394282
RNF138	1.07541e-63	3.60672e-59	0.419525
CYTH1	1.78903e-63	6.00005e-59	0.390093
EPC1	3.84142e-63	1.28834e-58	0.422667
EMB	1.37586e-62	4.61437e-58	0.401554
SAMHD1	1.5966e-62	5.35467e-58	0.362477
2021-09-01	6.25094e-62	2.09644e-57	0.356658
SLC39A8	6.60645e-62	2.21567e-57	0.355976
RNASET2	8.03772e-62	2.69569e-57	0.312988
NDUFV2	2.6008e-61	8.72256e-57	0.4344
UBA52	2.96831e-61	9.95512e-57	0.278456
RPL27	3.56721e-61	1.19637e-56	0.313665
KLF6	4.14186e-61	1.3891e-56	0.473879
CALM1	7.47703e-61	2.50765e-56	0.326649
PLK3	1.12604e-60	3.7765e-56	0.372293
SELENOK	3.08054e-60	1.03315e-55	0.348612
MFSD14A	5.72032e-60	1.91848e-55	0.331886
RHOH	3.04445e-59	1.02105e-54	0.353729
FUS	3.45088e-59	1.15736e-54	0.385606
PIM1	7.32098e-59	2.45531e-54	0.330937
MAML2	1.4243e-58	4.77683e-54	0.352068
RBMS1	1.58876e-58	5.3284e-54	0.394251
FAM107B	9.79091e-58	3.28367e-53	0.350264
ZFP36	1.38319e-57	4.63895e-53	0.399828
HLA-A	2.3071e-57	7.73754e-53	0.266755
GPCPD1	4.49794e-57	1.50852e-52	0.373984
CD55	5.12298e-57	1.71815e-52	0.276744
ALG13	8.26541e-57	2.77205e-52	0.34465
TMEM123	1.41403e-56	4.74238e-52	0.276406
DDX24	4.22404e-56	1.41666e-51	0.351377
RPL15	4.47285e-56	1.5001e-51	0.254747
PFKFB3	7.18491e-56	2.40967e-51	0.396709
IVNS1ABP	9.60695e-56	3.22198e-51	0.342938
ABRACL	1.18421e-55	3.9716e-51	0.327538
EEF1D	1.56783e-55	5.25819e-51	0.275391
CD48	1.60395e-55	5.37933e-51	0.30201
CCSER2	2.67071e-55	8.95703e-51	0.336314
SERINC5	3.36157e-55	1.1274e-50	0.323127
SOCS1	3.5576e-55	1.19315e-50	0.455683
GYPC	4.01557e-55	1.34674e-50	0.369514
IQGAP2	8.40623e-55	2.81928e-50	0.337563
RCAN3	9.03953e-55	3.03168e-50	0.334813
TRBC1	6.81904e-54	2.28697e-49	0.368527
TUBB4B	9.64639e-54	3.23521e-49	0.45517
S1PR1	1.44904e-53	4.85981e-49	0.344336
YIPF5	1.49108e-53	5.00077e-49	0.35253
CRTC3	1.6501e-53	5.53411e-49	0.321702
YWHAZ	1.19426e-52	4.00531e-48	0.284421
KLF2	1.58205e-52	5.30589e-48	0.407569
SBDS	2.75953e-52	9.2549e-48	0.339068
P2RY8	2.80981e-52	9.42356e-48	0.341472
ARID5B	5.69638e-52	1.91045e-47	0.327389
TSPYL2	5.81496e-52	1.95022e-47	0.442563
RPL13A	6.3604e-52	2.13315e-47	0.289741
HAUS3	7.8477e-52	2.63196e-47	0.300244
BCAS2	2.1087e-51	7.07215e-47	0.320407
TOMM7	5.23984e-51	1.75734e-46	0.296253
RPS2	7.0892e-51	2.37758e-46	0.256959
RNF149	7.86901e-51	2.63911e-46	0.269686
C12orf57	8.35401e-50	2.80177e-45	0.341395
CD44	1.21017e-49	4.05867e-45	0.298152
GIMAP7	1.5919e-49	5.33893e-45	0.275016
ODF2L	2.07915e-49	6.97305e-45	0.402384
SRSF5	3.23003e-49	1.08329e-44	0.320959
DOCK10	9.41314e-49	3.15698e-44	0.333469
STK4	2.00173e-48	6.71341e-44	0.304304
ARID4B	2.54749e-48	8.54378e-44	0.329661
TRBC2	2.93281e-48	9.83606e-44	0.428376
PGK1	3.08418e-48	1.03437e-43	0.286
BIRC3	8.75452e-48	2.93609e-43	0.364655
HNRNPA1	1.12907e-47	3.78668e-43	0.279885
USP3	1.13754e-47	3.81509e-43	0.276947
TNFAIP8	2.64058e-47	8.85597e-43	0.321039
KLF3	1.48429e-46	4.97801e-42	0.380909
SOD1	2.8744e-46	9.64015e-42	0.291981
HERPUD2	3.13672e-46	1.05199e-41	0.328902
PER1	3.80379e-46	1.27571e-41	0.338497
BIRC2	5.27624e-46	1.76955e-41	0.362939
HNRNPA0	6.02265e-46	2.01988e-41	0.298291
EVL	2.00227e-45	6.71522e-41	0.276239
PARP8	3.33816e-45	1.11955e-40	0.328927
SNHG8	4.59281e-45	1.54034e-40	0.314021
CITED2	2.95437e-44	9.90835e-40	0.397491
SKAP1	6.28075e-44	2.10644e-39	0.263244
RGS10	7.2523e-44	2.43228e-39	0.266963
CDKN1B	1.03087e-43	3.45732e-39	0.313516
NR3C1	1.61759e-43	5.42506e-39	0.470096
DENND4A	2.33425e-43	7.82862e-39	0.304196
CBLB	6.59376e-43	2.21142e-38	0.293113
RPL36A	6.30669e-42	2.11514e-37	0.268623
2021-09-06	2.42842e-41	8.14442e-37	0.306118
HIVEP2	3.17089e-41	1.06345e-36	0.270506
EEF1G	5.0222e-41	1.68434e-36	0.267023
EIF4B	5.60371e-41	1.87937e-36	0.288827
RASA3	2.96274e-40	9.93645e-36	0.29869
AQP3	3.51456e-40	1.17871e-35	0.254199
GPBP1	7.16995e-40	2.40466e-35	0.277484
MATR3.2	2.19398e-39	7.35819e-35	0.273518
BCLAF1	2.27009e-39	7.61343e-35	0.288085
RBL2	4.09602e-39	1.37372e-34	0.2853
BORCS5	4.61215e-39	1.54682e-34	0.288777
CHD2	5.46211e-39	1.83188e-34	0.314185
PPP1R2	8.2275e-39	2.75934e-34	0.313967
HSPA9	8.45924e-39	2.83706e-34	0.273518
SLFN5	8.55246e-39	2.86832e-34	0.256584
RSBN1	1.26982e-38	4.25873e-34	0.279476
CYLD	1.34721e-38	4.51828e-34	0.281605
CENPC	2.64654e-38	8.87596e-34	0.282045
TOMM20	5.48139e-38	1.83835e-33	0.255565
RPS20	8.91916e-38	2.99131e-33	0.283219
JUN	1.98421e-37	6.65463e-33	0.384091
PELI1	3.84564e-37	1.28975e-32	0.283547
MAPK1IP1L	4.52719e-37	1.51833e-32	0.285086
CLK1	8.31237e-37	2.7878e-32	0.280951
TTC39C	1.59244e-36	5.34072e-32	0.272253
TENT5C	6.19612e-36	2.07805e-31	0.274017
NUP98	7.66802e-36	2.5717e-31	0.274774
JAK3	9.00808e-36	3.02113e-31	0.262205
RSL1D1	1.71064e-35	5.73714e-31	0.290004
IL6ST	2.78101e-35	9.32694e-31	0.25482
CDK17	2.92514e-35	9.81032e-31	0.311228
CHD1	5.58202e-35	1.8721e-30	0.28541
TMEM173	6.97931e-35	2.34072e-30	0.265041
VDAC1	1.14485e-34	3.83959e-30	0.269024
AMD1	1.28357e-34	4.30485e-30	0.255667
ST3GAL1	1.65436e-34	5.54841e-30	0.27555
SFPQ	4.8609e-33	1.63025e-28	0.251
NSMCE3	2.93979e-32	9.85948e-28	0.292395
HNRNPUL1	3.69001e-32	1.23756e-27	0.271079
NASP	7.59696e-32	2.54787e-27	0.255507
SKIL	2.43388e-31	8.16275e-27	0.27748
PRRC2C	2.9224e-31	9.80116e-27	0.25344
TMF1	4.70504e-31	1.57798e-26	0.266061
TNIP2	3.83876e-30	1.28744e-25	0.260655
SNHG15	1.21048e-29	4.0597e-25	0.27809
OSBPL8	1.4525e-28	4.8714e-24	0.253326
GLIPR1	2.32444e-25	7.79571e-21	0.259808
PDCL3	1.27152e-22	4.26441e-18	0.254455
MYADM	2.82336e-20	9.46899e-16	0.267203

## Sheet: 3
gene	p_val	p_val_adj	avg_logFC
GAST	0	0	2.81396
TTR	0	0	2.7086
CHGB	0	0	2.67401
CPE	0	0	2.64942
DIRAS3	0	0	2.63383
CLU	0	0	2.47258
SCG5	0	0	2.40424
ERRFI1	0	0	2.30114
NNMT	0	0	2.28769
MS4A8	0	0	2.24709
BCAM	0	0	2.17488
PHGR1	0	0	2.13216
CHGA	0	0	2.12801
PCSK1N	0	0	2.02308
PCSK2	0	0	1.94988
VTN	0	0	1.92951
GHRH	0	0	1.90763
GHRL	0	0	1.50188
HSPB6	7.59472e-300	2.54712e-295	2.06662
DEPP1	2.04881e-278	6.87131e-274	1.89924
IGHV1-3	3.03381e-257	1.01748e-252	2.89447
BAMBI	2.06473e-237	6.9247e-233	1.6477
HAP1	1.16581e-227	3.9099e-223	1.78575
RBP4	5.72227e-225	1.91913e-220	1.69786
IGHV3-23	4.20823e-223	1.41136e-218	2.07934
EPCAM	5.57189e-220	1.8687e-215	1.66861
PCSK1	9.15507e-210	3.07043e-205	1.87776
SCG3	6.28828e-206	2.10896e-201	1.77605
STMN1	8.9249e-203	2.99323e-198	1.96517
BEX1	3.30723e-200	1.10918e-195	1.56688
MBOAT4	4.85548e-199	1.62843e-194	1.81658
IGKV3-15	9.99304e-197	3.35147e-192	3.61192
MT1G	4.95502e-196	1.66182e-191	1.08352
PEMT	1.03654e-195	3.47636e-191	1.88835
RHOB	5.43986e-195	1.82442e-190	1.85749
CES1	1.28341e-187	4.30431e-183	1.74576
ARFGEF3	5.82811e-184	1.95463e-179	1.68283
MIR7-3HG	2.63604e-182	8.84074e-178	1.52857
CD24	2.69594e-178	9.04166e-174	1.83926
DSP	1.95324e-177	6.55078e-173	1.73507
MSMB	2.03231e-162	6.81597e-158	1.41074
FXYD2	4.83161e-150	1.62043e-145	1.50662
IGLV2-14	1.10199e-148	3.69587e-144	2.89488
MEG3	1.73528e-147	5.81977e-143	1.62892
IFI6	2.14596e-140	7.19713e-136	1.89612
SCGN	6.1395e-134	2.05907e-129	1.55299
JCHAIN	4.31782e-129	1.44811e-124	1.11244
PAM	4.88673e-129	1.63891e-124	1.74483
COL22A1	2.78726e-126	9.34792e-122	1.5343
KRT8	6.31243e-123	2.11706e-118	1.40921
CKB	1.42124e-121	4.76657e-117	1.51277
PKIB	7.75134e-120	2.59965e-115	1.38818
CDHR5	8.06414e-118	2.70455e-113	1.44199
TMEM176B	6.51769e-116	2.1859e-111	1.43414
KRT18	1.39185e-111	4.66798e-107	1.43677
APLP1	3.95967e-111	1.32799e-106	1.39153
AANAT	5.50041e-109	1.84473e-104	1.34529
EGR4	2.99242e-105	1.0036e-100	1.17078
QDPR	1.69952e-104	5.69984e-100	1.6404
ACTG1	2.63902e-102	8.85076e-98	1.01088
MT1E	2.715e-102	9.10557e-98	0.492133
CDHR3	1.04912e-100	3.51854e-96	1.48893
SERPINA1	1.19568e-96	4.01007e-92	1.02182
SNAP25	2.4074e-96	8.07392e-92	1.45046
UGDH	4.34567e-96	1.45745e-91	1.56665
UCHL1	4.03139e-90	1.35205e-85	1.45679
KLK11	3.23129e-89	1.08371e-84	1.38512
SVIP	2.42136e-87	8.12076e-83	1.58549
CRYGD	3.05345e-87	1.02407e-82	1.18358
TM4SF4	6.22554e-86	2.08792e-81	1.25832
EGR1	5.10424e-85	1.71186e-80	1.1854
USH1C	1.1741e-84	3.9377e-80	1.28825
SCG2	1.23007e-84	4.12539e-80	1.40581
SMOC1	1.60436e-84	5.38069e-80	1.35887
SSR4	2.36551e-82	7.93344e-78	1.25164
IER3	7.97569e-82	2.67489e-77	1.40287
TMEM176A	4.17295e-81	1.39952e-76	1.30211
BTG2	2.61962e-77	8.7857e-73	1.28642
SEZ6L2	3.61504e-74	1.21241e-69	1.23303
GPX3	5.15383e-74	1.72849e-69	1.34188
CYSTM1	5.36539e-73	1.79945e-68	1.38137
KIAA1324	9.49936e-72	3.1859e-67	1.3276
TENT5A	5.18954e-71	1.74047e-66	1.3733
BEX3	4.18259e-70	1.40276e-65	1.38613
MT1M	7.93869e-70	2.66248e-65	0.872013
NEDD9	5.02961e-68	1.68683e-63	1.45052
TM4SF5	6.58212e-61	2.20751e-56	1.16519
RHOBTB3	9.75844e-60	3.27278e-55	1.37873
PKM	5.04003e-56	1.69032e-51	1.30887
HSP90B1	3.72812e-52	1.25034e-47	1.07829
SPINT2	1.79359e-51	6.01533e-47	1.24136
CMTM8	2.6599e-49	8.92077e-45	1.25017
ACSL1	1.91544e-48	6.424e-44	1.28634
HSPA5	8.13785e-48	2.72927e-43	1.10046
GABARAPL2	1.43322e-47	4.80673e-43	1.30329
SELENOP	5.19166e-47	1.74118e-42	1.02611
MT1F	2.90054e-42	9.72785e-38	0.74243
SQSTM1	3.51219e-42	1.17792e-37	1.17133
ASGR1	6.15812e-42	2.06531e-37	1.19705
BEX2	3.6021e-41	1.20807e-36	1.22156
PDK4	3.8128e-41	1.27874e-36	1.00242
ATP1B1	4.46753e-41	1.49832e-36	1.26097
KLF10	2.67736e-40	8.97931e-36	1.27067
TIMP1	3.92488e-40	1.31633e-35	0.484482
PEBP1	5.85414e-39	1.96336e-34	1.22091
SEC11C	2.12089e-38	7.11304e-34	1.22547
IGHA1	1.80884e-37	6.06648e-33	0.426524
EID1	4.0052e-34	1.34327e-29	1.11932
DST	1.57605e-33	5.28577e-29	1.1248
IRS2	1.36756e-31	4.58651e-27	1.19644
SERPINB6	5.80808e-30	1.94791e-25	1.17469
UBB	1.37702e-29	4.61825e-25	0.748316
CD9	2.25112e-29	7.54982e-25	1.04114
GAPDH	2.03081e-28	6.81092e-24	0.455655
SLC25A4	2.21794e-28	7.43854e-24	1.11072
HSP90AB1	1.25124e-27	4.1964e-23	0.6631
CALD1	1.29354e-27	4.33828e-23	0.919574
RPL3	1.63617e-27	5.48739e-23	0.390369
P4HTM	2.60797e-27	8.7466e-23	1.20261
SELENOM	1.64201e-26	5.50696e-22	1.04034
PERP	1.28829e-25	4.32066e-21	1.08041
TUBA1A	6.64056e-25	2.22711e-20	0.869169
CRY2	1.08438e-24	3.63679e-20	1.14612
MT-ATP8	1.14738e-24	3.84807e-20	0.704481
LGALS3BP	3.56562e-24	1.19584e-19	1.06185
NPDC1	7.39273e-24	2.47937e-19	0.976673
NFKBIA	8.85862e-24	2.971e-19	0.524048
PRDX2	1.10172e-23	3.69494e-19	1.11265
DSTN	3.08242e-22	1.03378e-17	1.04507
CALM2	4.48176e-22	1.50309e-17	0.721825
FOSB	1.77419e-21	5.95029e-17	0.570884
SELENOW	9.90443e-21	3.32175e-16	0.980787
FABP5	1.83408e-20	6.15115e-16	1.03049
FKBP2	1.96863e-19	6.60238e-15	1.0678
PPIB	2.53517e-19	8.50245e-15	0.627759
ZFAND5	4.0504e-18	1.35842e-13	0.840042
AQP3	2.26229e-17	7.58727e-13	0.988074
TMEM59	1.44956e-16	4.86152e-12	0.961634
COMTD1	7.57688e-16	2.54113e-11	0.996355
LDLR	1.00019e-15	3.35443e-11	1.06768
DAP	1.45774e-15	4.88896e-11	1.15685
TP53INP1	1.14591e-14	3.84314e-10	0.919237
PDE4DIP	7.36938e-14	2.47154e-09	1.01009
C12orf75	7.87314e-14	2.64049e-09	0.855796
MIF	7.4688e-12	2.50489e-07	0.646202
PLPP5	9.36861e-12	3.14205e-07	0.931259
LMNA	9.6333e-12	3.23081e-07	0.407911
ALDOA	1.96118e-11	6.57741e-07	0.659127
HSPB1	1.64714e-10	5.52419e-06	0.748233
CHCHD2	2.12065e-10	7.11225e-06	0.570285
NENF	2.25236e-10	7.55397e-06	0.935435
YWHAE	3.42767e-10	1.14957e-05	0.978775
DDX5	4.86049e-10	1.63011e-05	0.36439
MDH1	7.18178e-10	2.40863e-05	1.05434
MT-ND5	1.11183e-09	3.72884e-05	0.313989
SDF2L1	1.56726e-09	5.25627e-05	0.900441
NEAT1	4.26497e-09	0.000143039	0.253505
LRRFIP1	2.92849e-08	0.000982157	0.603237
H2AFJ	4.95644e-08	0.00166229	0.876527
NAA20	5.65476e-08	0.00189649	0.967141
CEBPD	1.03996e-07	0.00348782	0.458803
CALR	1.12931e-07	0.00378747	0.628176
GADD45B	1.40943e-07	0.00472695	0.477974
ATP6AP1	1.81959e-07	0.00610253	0.924059
PTMS	1.91668e-07	0.00642818	0.802965
SELENOT	2.27839e-07	0.00764128	0.265787
MAFF	3.5932e-07	0.0120509	0.656111
SKP1	8.54541e-07	0.0286596	0.581515
HNRNPL	1.0989e-06	0.036855	0.252447
SEM1	1.48231e-06	0.0497137	0.250848

## Sheet: 4
gene	p_val	p_val_adj	avg_logFC
TM4SF1	0	0	3.04463
SPARCL1	0	0	3.00092
ACKR1	0	0	2.86407
PLVAP	0	0	2.83429
IFI27	0	0	2.80918
FABP4	0	0	2.72362
RAMP2	0	0	2.60565
IGFBP7	0	0	2.5927
VWF	0	0	2.57212
A2M	0	0	2.48555
CAV1	0	0	2.28894
CRIP2	0	0	2.27888
HSPG2	0	0	2.25692
EMP1	0	0	2.24196
SPRY1	0	0	2.19274
CALCRL	0	0	2.14518
ID1	0	0	2.07869
AQP1	0	0	2.06649
CCL14	0	0	2.06429
ENG	0	0	2.05991
EGFL7	0	0	1.97637
CLDN5	0	0	1.96513
GNG11	0	0	1.95348
IGFBP4	0	0	1.91689
RNASE1	0	0	1.88682
TIMP3	0	0	1.88357
ADAMTS1	0	0	1.87725
EPAS1	0	0	1.80636
SLC9A3R2	0	0	1.79815
NPDC1	0	0	1.7871
EMCN	0	0	1.77309
POSTN	0	0	1.70893
ESAM	0	0	1.69153
HYAL2	0	0	1.67971
SPARC	0	0	1.64619
MTUS1	0	0	1.64229
ADIRF	0	0	1.64072
CD34	0	0	1.63905
ADAMTS9	0	0	1.63798
SLCO2A1	0	0	1.61994
RAMP3	0	0	1.60976
CAVIN1	0	0	1.60511
COL15A1	0	0	1.59414
CLEC14A	0	0	1.58706
MGP	0	0	1.54384
COL4A1	0	0	1.53942
ADGRL4	0	0	1.52923
THBD	0	0	1.49801
COL4A2	0	0	1.46912
IL33	0	0	1.46238
ADAM15	0	0	1.46135
CAVIN2	0	0	1.43105
S100A13	0	0	1.42924
FLT1	0	0	1.4138
CNN3	0	0	1.41226
CYYR1	0	0	1.41039
CTGF	0	0	1.36678
FAM107A	0	0	1.3654
APOLD1	0	0	1.34795
PALMD	0	0	1.34198
JAM2	0	0	1.34192
HES1	0	0	1.33062
SOX17	0	0	1.33061
TINAGL1	0	0	1.31838
MCTP1	0	0	1.31704
PTPRB	0	0	1.3169
CDH5	0	0	1.30709
PODXL	0	0	1.30294
PIK3R3	0	0	1.28819
LDB2	0	0	1.27944
CD93	0	0	1.27661
WWTR1	0	0	1.27196
ARHGAP29	0	0	1.25544
TIE1	0	0	1.24965
TSPAN7	0	0	1.21332
LMCD1	0	0	1.20461
MMRN1	0	0	1.19468
S100A16	0	0	1.16238
PLPP3	0	0	1.14537
MMRN2	0	0	1.11558
ZNF385D	0	0	1.10599
MALL	0	0	1.10372
LIFR	0	0	1.09123
SNCG	0	0	1.08553
CXorf36	0	0	1.07556
DLC1	0	0	1.06909
FAM167B	0	0	1.06204
SERPINH1	0	0	1.06125
CLEC3B	0	0	1.05549
VWA1	0	0	1.04191
NFIB	0	0	1.03018
NES	0	0	1.02985
CAV2	0	0	1.01066
RAI14	0	0	0.99895
TMEM88	0	0	0.989763
LIMS2	0	0	0.9789
TGM2	0	0	0.9737
TCIM	0	0	0.969816
CNKSR3	0	0	0.962954
NRN1	0	0	0.961282
MYCT1	0	0	0.960636
ADCY4	0	0	0.953693
COX7A1	0	0	0.949617
ERG	0	0	0.94483
TNFRSF10D	0	0	0.901561
TM4SF18	0	0	0.900842
SYNPO	0	0	0.896461
RHOJ	0	0	0.896375
TJP1	0	0	0.872382
CRIM1	0	0	0.865349
PTPRM	0	0	0.848476
ADGRF5	0	0	0.847396
SOX18	0	0	0.846154
LRRC32	0	0	0.842595
EFNB2	0	0	0.839006
MCAM	0	0	0.828892
PCDH17	0	0	0.828689
GJA1	0	0	0.774482
NOSTRIN	0	0	0.773912
RAPGEF3	0	0	0.765865
ECSCR	0	0	0.760337
TNS2	0	0	0.759772
TMEM255B	0	0	0.745911
LAMA5	0	0	0.742362
RAPGEF5	0	0	0.732234
PKP4	0	0	0.729294
ADM5	0	0	0.726608
ITGB4	0	0	0.7049
MPZL2	0	0	0.699507
ROBO4	0	0	0.697799
PREX2	0	0	0.695973
SELP	0	0	0.692236
SOX7	0	0	0.687787
RASIP1	0	0	0.68194
IGFBP2	0	0	0.674462
SHROOM4	0	0	0.667864
MEOX1	0	0	0.664135
TEK	0	0	0.66244
THSD7A	0	0	0.661614
GALNT18	0	0	0.655494
FZD4	0	0	0.653065
KANK3	0	0	0.628146
ACVRL1	0	0	0.623136
PTPN14	0	0	0.610268
NOS3	0	0	0.610112
SHANK3	0	0	0.599482
CNTNAP3B	0	0	0.587343
CFI	0	0	0.566596
ARHGAP23	0	0	0.54239
HSPA12B	0	0	0.541493
ARHGEF15	0	0	0.480386
EPHB4	0	0	0.454244
FGD5	0	0	0.445493
TEAD4	0	0	0.425573
TSC22D1	2.63586e-306	8.84014e-302	1.78314
OLFM1	1.57605e-305	5.28577e-301	0.744254
PECAM1	2.40255e-304	8.05766e-300	2.05046
SERPINE1	1.55088e-302	5.20134e-298	1.47907
HEG1	5.95135e-299	1.99597e-294	1.06728
EHD2	3.43633e-297	1.15248e-292	0.717797
TMEM47	5.41735e-287	1.81687e-282	0.544021
PLS3	5.06365e-286	1.69825e-281	0.931944
RBPMS	2.01138e-285	6.74577e-281	0.89376
IL3RA	1.70614e-284	5.72205e-280	0.843726
MKL2	1.68579e-283	5.65381e-279	1.07611
DOCK9	1.74443e-275	5.85046e-271	0.946686
PDLIM1	8.58885e-271	2.88053e-266	1.92958
ID3	5.08192e-270	1.70437e-265	1.57385
PLPP1	2.18977e-264	7.34406e-260	1.87682
BMPR2	2.80144e-257	9.39546e-253	1.00042
ATP8B1	1.40652e-255	4.71717e-251	0.487828
BACE2	2.00551e-254	6.72609e-250	0.805159
FAM198B	2.58418e-253	8.66681e-249	0.959879
CD59	5.62807e-252	1.88754e-247	1.45487
RDX	1.83046e-248	6.139e-244	1.30912
TRIM47	2.1418e-248	7.18317e-244	0.54149
2021-09-10	1.7559e-246	5.88893e-242	0.674002
BCAM	6.353e-242	2.13067e-237	0.813955
MYL9	1.84635e-236	6.1923e-232	0.73529
PDLIM4	1.20117e-235	4.02847e-231	0.636672
LIMCH1	3.2501e-233	1.09002e-228	0.712492
RAB13	1.47245e-229	4.93829e-225	1.17644
NECTIN2	2.06193e-229	6.91531e-225	1.01331
FSCN1	2.81179e-229	9.43018e-225	0.789378
SOCS2	1.00517e-227	3.37114e-223	0.989941
EFNA1	3.73891e-227	1.25396e-222	0.822014
CTTNBP2NL	7.42357e-227	2.48972e-222	0.660383
PPIC	7.94421e-225	2.66433e-220	0.750279
CYR61	8.76385e-223	2.93922e-218	1.3386
NOTCH4	1.68334e-222	5.64558e-218	0.657713
GSN	1.55976e-221	5.23112e-217	1.85257
PRSS23	1.34812e-220	4.52132e-216	1.27778
UACA	7.63307e-220	2.55998e-215	0.950268
NR2F2	9.14046e-214	3.06553e-209	0.572806
CLIC2	1.9624e-213	6.58148e-209	0.500599
CAVIN3	2.31066e-209	7.7495e-205	0.799791
SERPING1	2.61219e-209	8.76077e-205	0.583716
BCAR1	2.95648e-207	9.91544e-203	0.554216
FAM171A1	8.8607e-205	2.9717e-200	0.509738
TCF4	6.47648e-204	2.17208e-199	1.40036
LAMB1	7.70926e-204	2.58553e-199	0.650028
LAMB2	5.21308e-203	1.74836e-198	0.621063
EVA1C	6.55473e-203	2.19833e-198	0.853873
TMTC1	2.24835e-202	7.54053e-198	0.556207
TSPAN4	8.88791e-202	2.98083e-197	0.832475
ADAMTS4	3.35641e-200	1.12567e-195	0.757004
ARHGAP31	1.71133e-199	5.73947e-195	0.776722
CFH	2.76608e-199	9.27688e-195	0.898777
FN1	7.94001e-199	2.66292e-194	0.861027
CLIC4	1.53009e-197	5.1316e-193	1.01452
CD151	4.01869e-196	1.34779e-191	1.21006
FERMT2	1.06159e-195	3.56037e-191	0.576067
SH3BGRL2	2.31361e-195	7.75939e-191	0.551213
OSMR	2.98941e-194	1.00259e-189	0.455545
PPFIBP1	3.3882e-193	1.13633e-188	0.609763
CDC42EP1	7.86956e-192	2.63929e-187	0.60104
COL18A1	2.62919e-191	8.81778e-187	0.725895
MGST2	7.53994e-191	2.52874e-186	0.91034
LEPR	1.70288e-190	5.71111e-186	0.514579
TFPI	6.58239e-189	2.2076e-184	0.946811
NNMT	4.03049e-186	1.35175e-181	0.581822
NRP1	1.3912e-184	4.6658e-180	0.814265
ITGA6	7.69646e-184	2.58124e-179	1.06424
CALD1	5.37322e-182	1.80207e-177	0.988987
ITPKC	8.03447e-182	2.6946e-177	0.718466
JAG1	1.0504e-180	3.52285e-176	0.817643
NCKAP1	1.31394e-179	4.40668e-175	0.569339
ITGA5	2.62757e-179	8.81236e-175	0.981649
RASAL2	2.49094e-177	8.35412e-173	0.446915
PLXND1	5.84517e-177	1.96035e-172	0.713733
ETS2	1.14374e-176	3.83589e-172	1.28479
C7	2.68911e-176	9.01875e-172	0.860092
MDK	6.28253e-176	2.10704e-171	0.699292
ENPP2	3.04916e-175	1.02263e-170	0.541459
FSTL1	3.37646e-174	1.1324e-169	0.536115
SASH1	6.26455e-174	2.101e-169	0.60461
SEMA6A	2.80118e-173	9.39459e-169	0.400428
NRP2	3.13728e-173	1.05218e-168	0.498457
STOM	7.5601e-173	2.53551e-168	1.454
APP	8.76355e-173	2.93912e-168	1.41
CTTN	9.74283e-173	3.26755e-168	0.573022
TNFAIP1	1.94984e-172	6.53936e-168	0.595671
RHOC	1.54945e-171	5.19654e-167	1.19243
DPYSL3	3.13284e-169	1.05069e-164	0.519575
NQO1	2.72315e-168	9.1329e-164	0.597459
SLC29A1	3.63918e-168	1.22051e-163	0.573631
RCAN1	8.38745e-167	2.81298e-162	1.17496
FKBP9	7.88857e-166	2.64567e-161	0.559485
BCR	1.19747e-165	4.01607e-161	0.592679
PTMS	2.13482e-165	7.15975e-161	1.19196
EPHX1	8.06859e-165	2.70604e-160	0.689663
RASA4	4.89025e-164	1.64009e-159	0.800313
RPS6KA2	5.079e-163	1.7034e-158	0.620371
DUSP23	1.57764e-161	5.29108e-157	1.11086
CRYBG3	2.07847e-159	6.97078e-155	0.584314
TUBB6	2.41635e-159	8.10396e-155	0.783959
IFITM3	9.08274e-159	3.04617e-154	1.73
CD9	1.4663e-158	4.91767e-154	1.17978
MAGI1	2.20345e-158	7.38992e-154	0.523684
CD200	1.19608e-157	4.01141e-153	0.669338
ELK3	6.40464e-157	2.14799e-152	0.95878
SOCS3	1.89518e-155	6.35607e-151	1.819
CD320	4.61888e-155	1.54908e-150	1.39295
LHFPL6	6.9324e-155	2.32499e-150	0.515481
RBP7	6.3828e-154	2.14066e-149	1.1337
FZD6	2.26018e-152	7.58019e-148	0.416809
CDC42BPA	6.81485e-152	2.28556e-147	0.486715
INPP1	1.59019e-151	5.33319e-147	0.728858
PMP22	1.87017e-150	6.27217e-146	0.739148
PLCB1	1.12294e-148	3.76611e-144	0.609646
RBMS2	2.31664e-147	7.76955e-143	0.4571
EMP2	3.08801e-147	1.03566e-142	0.764951
FKBP1A	1.88424e-146	6.31935e-142	1.53101
C1orf54	2.39553e-145	8.03413e-141	0.647964
CTNNAL1	3.08558e-144	1.03484e-139	0.628057
MYOF	2.75024e-141	9.22377e-137	0.565119
TRIOBP	3.80614e-141	1.2765e-136	0.53472
ASS1	7.77694e-141	2.60823e-136	0.973659
CPNE8	1.38502e-140	4.64508e-136	0.46079
PIK3C2A	7.5132e-138	2.51978e-133	0.736042
FNBP1L	1.84234e-136	6.17884e-132	0.518839
ABL2	6.79605e-134	2.27926e-129	0.886025
PTPRG	7.03858e-133	2.3606e-128	0.572363
FKBP10	5.59313e-132	1.87582e-127	0.366307
ICAM1	1.46375e-131	4.90913e-127	1.60933
PROS1	2.9066e-131	9.74815e-127	0.441829
SHC1	7.81225e-131	2.62007e-126	0.800274
SELENOW	1.02246e-130	3.42912e-126	1.45099
STAB1	1.50884e-130	5.06035e-126	0.668819
SNTB2	2.26131e-130	7.58398e-126	0.509026
NDRG1	5.85993e-130	1.9653e-125	1.13097
MGLL	2.86311e-129	9.60229e-125	0.621424
SPTBN1	7.93865e-128	2.66246e-123	1.17708
TGFBR2	1.45062e-124	4.8651e-120	1.2459
DBN1	2.16338e-123	7.25555e-119	0.537664
SNAI1	2.62596e-122	8.80694e-118	0.723095
FAM241A	4.51097e-122	1.51289e-117	0.530643
LIMA1	6.96963e-121	2.33747e-116	0.558139
TCN2	2.07759e-120	6.96782e-116	0.589805
LMNA	2.28803e-120	7.67359e-116	1.40162
CXCL12	4.63777e-119	1.55541e-114	1.38985
HDGFL3	1.45498e-118	4.87971e-114	0.498099
IPO11	7.80382e-118	2.61725e-113	0.482161
ASAP1	1.90108e-117	6.37585e-113	0.631171
CCL2	1.5162e-116	5.08503e-112	1.6542
LAMC1	3.67174e-116	1.23143e-111	0.490612
HSPB1	1.59878e-115	5.36199e-111	1.28503
CTNNA1	2.98693e-115	1.00176e-110	0.751586
ENTPD1	3.80038e-115	1.27457e-110	0.674839
PTPRK	1.93436e-114	6.48746e-110	0.48018
CD81	2.68244e-114	8.99637e-110	0.903841
HAPLN3	8.53307e-114	2.86182e-109	0.550685
SELENON	1.8867e-113	6.32762e-109	0.471573
KIAA0355	2.44776e-113	8.20928e-109	0.517269
PNP	1.09396e-112	3.66892e-108	1.35372
FBLN2	1.82569e-112	6.123e-108	0.63781
RIPOR1	1.54578e-110	5.18425e-106	0.561506
KLF4	3.27021e-110	1.09676e-105	0.937601
SWAP70	5.0173e-110	1.6827e-105	0.913817
PLEKHG1	5.76473e-110	1.93337e-105	0.591216
DAB2	1.18331e-109	3.96859e-105	0.501548
PHLDB1	1.75822e-109	5.89673e-105	0.363604
FLNB	1.77369e-109	5.94859e-105	0.599879
TNFRSF1A	2.63828e-108	8.84826e-104	0.818712
LRRC8A	1.08594e-107	3.64201e-103	0.590787
FRY	4.14155e-106	1.38899e-101	0.442713
NCOA7	2.88122e-105	9.66305e-101	1.22411
A4GALT	1.19266e-104	3.99994e-100	0.46319
ANXA2	1.26197e-104	4.23241e-100	1.03904
MYO1C	2.07144e-104	6.94718e-100	0.446452
PDLIM5	6.73722e-103	2.25953e-98	0.859438
HTRA1	2.88004e-102	9.65908e-98	0.506609
TCEAL9	4.16178e-102	1.39578e-97	0.593979
LUZP1	8.64331e-102	2.89879e-97	0.630036
CTNND1	1.54931e-99	5.19606e-95	0.524712
ADGRG1	2.97991e-99	9.99401e-95	0.519834
RCN1	3.79796e-99	1.27376e-94	0.508475
ACTN1	9.05349e-99	3.03636e-94	0.813996
VAT1	1.40788e-98	4.72176e-94	0.671847
ATN1	1.30789e-97	4.38641e-93	0.484721
CNRIP1	3.51198e-97	1.17785e-92	0.38773
SSFA2	4.26555e-96	1.43058e-91	0.622465
PTK2	2.34881e-95	7.87744e-91	0.612899
EHD4	5.8036e-95	1.94641e-90	0.771867
IL6ST	1.20042e-94	4.02597e-90	0.999893
PDK4	3.55559e-94	1.19248e-89	0.623359
TPM4	1.19479e-93	4.0071e-89	1.0962
C9orf3	1.83597e-93	6.15747e-89	0.527778
ARHGEF12	2.43129e-92	8.15406e-88	0.475611
CCDC50	4.78095e-92	1.60343e-87	0.732352
AKAP2	1.01158e-90	3.39263e-86	0.457728
DUSP6	1.16267e-90	3.89936e-86	0.953229
S1PR1	3.77949e-90	1.26757e-85	1.00558
EPS8	1.44031e-89	4.83052e-85	0.412414
MAST4	1.34417e-88	4.50807e-84	0.661997
BAG3	3.82907e-86	1.28419e-81	0.677415
CCDC85B	1.39075e-85	4.66431e-81	1.02494
ARL2	1.40447e-85	4.7103e-81	0.696154
RPGR	1.54344e-84	5.1764e-80	0.461948
ECE1	7.44912e-84	2.49829e-79	0.709453
MMP2	4.07374e-83	1.36625e-78	0.306563
PHACTR2	8.80273e-83	2.95226e-78	0.52384
NEDD9	1.15336e-82	3.86813e-78	0.742751
LEPROT	1.49167e-81	5.00276e-77	0.648811
HSPA1A	4.06219e-81	1.36238e-76	0.466324
SELENOP	4.20653e-81	1.41079e-76	0.375705
PDLIM7	1.34706e-80	4.51778e-76	0.475177
RAB11A	1.94759e-80	6.53182e-76	0.873889
FABP5	2.13686e-80	7.16662e-76	1.31586
GAS6	2.13871e-80	7.1728e-76	0.659109
CDKN1A	3.16221e-80	1.06054e-75	1.22834
HIP1	3.72562e-80	1.2495e-75	0.406221
VIM	3.81072e-80	1.27804e-75	0.849678
NFIA	2.21782e-79	7.43813e-75	0.471358
MAP3K11	5.41406e-78	1.81577e-73	0.666367
RRBP1	3.92422e-77	1.31611e-72	0.723989
PKIG	8.16071e-77	2.73694e-72	0.774768
NBL1	9.82067e-77	3.29366e-72	0.380302
AKAP12	1.74804e-76	5.86258e-72	0.979637
HSPA1B	4.09893e-76	1.3747e-71	0.387784
PTTG1IP	7.65639e-76	2.5678e-71	0.769414
NFIC	9.73993e-73	3.26658e-68	0.599931
ASPH	1.85057e-72	6.20643e-68	0.603501
KLF7	3.0458e-72	1.0215e-67	0.478753
FAM213A	3.10982e-72	1.04297e-67	0.512019
PRCP	3.14452e-72	1.05461e-67	1.03084
FLOT1	6.24462e-72	2.09432e-67	0.68458
YBX3	9.44403e-71	3.16734e-66	0.822577
PLEC	1.61685e-70	5.42258e-66	0.798718
CRK	3.51765e-70	1.17975e-65	0.42322
NFE2L1	2.99363e-69	1.004e-64	0.409749
RALGAPA2	3.16776e-69	1.0624e-64	0.516765
RGL2	4.47819e-69	1.5019e-64	0.411782
CYFIP1	1.23424e-68	4.13939e-64	0.46358
PTP4A3	9.28793e-68	3.11498e-63	0.685527
YES1	1.03494e-67	3.47098e-63	0.439393
UGCG	1.65181e-67	5.53985e-63	0.788701
BHLHE40	2.72581e-67	9.14183e-63	0.982671
CHSY1	2.75952e-67	9.25489e-63	0.398743
PSMB5	3.69164e-67	1.2381e-62	0.632072
PLK2	6.67e-67	2.23698e-62	0.531836
LGALS3	5.2437e-66	1.75863e-61	0.56039
DNAJB4	7.22153e-66	2.42196e-61	0.514195
PICALM	7.31286e-66	2.45259e-61	0.552786
PEA15	3.09225e-65	1.03708e-60	0.59401
CD40	9.77665e-65	3.27889e-60	0.462528
CYB5A	2.5529e-64	8.56192e-60	0.630455
VGLL4	3.39017e-64	1.137e-59	0.462454
PTPN12	7.58331e-64	2.54329e-59	0.515688
ACTN4	9.04801e-64	3.03452e-59	0.806848
ZFYVE21	2.9334e-63	9.83804e-59	0.406417
BST2	4.60571e-63	1.54466e-58	0.812503
FOSL1	5.66518e-63	1.89999e-58	0.526511
TSHZ2	1.02057e-62	3.42278e-58	0.568381
GIMAP6	1.69283e-61	5.6774e-57	0.403331
TMEM204	1.74676e-61	5.85827e-57	0.565416
SGK1	2.26572e-61	7.59876e-57	0.932072
RAC1	3.08801e-61	1.03566e-56	0.753613
NUAK1	1.83587e-60	6.15716e-56	0.474234
CYB5R3	2.79899e-60	9.38726e-56	0.70373
MAPK3	4.08804e-60	1.37105e-55	0.369207
PLXNA2	4.25897e-60	1.42837e-55	0.424446
KCTD12	8.46819e-60	2.84006e-55	0.675259
WARS	1.11847e-59	3.75114e-55	0.66685
SOX4	3.40133e-59	1.14074e-54	0.46035
INSR	1.25781e-58	4.21843e-54	0.643858
TMSB10	2.0557e-58	6.8944e-54	0.727632
DSTN	3.44052e-58	1.15388e-53	0.730639
SULF2	4.16113e-58	1.39556e-53	0.374993
FEZ2	4.53597e-58	1.52127e-53	0.453653
UPP1	4.68556e-58	1.57144e-53	0.916077
PLSCR1	6.22477e-58	2.08766e-53	0.670811
ICAM2	1.8599e-57	6.23774e-53	0.833825
IFI44L	1.96178e-57	6.57943e-53	0.392009
PIEZO1	2.34715e-57	7.87188e-53	0.358966
FNIP2	9.32466e-57	3.12731e-52	0.448921
HBEGF	3.03578e-56	1.01814e-51	0.615263
EGR1	1.05794e-55	3.54814e-51	0.667031
TGFBR3	1.10244e-55	3.69736e-51	0.649117
GNAQ	1.19572e-55	4.01022e-51	0.51222
ABCD4	4.81866e-55	1.61608e-50	0.358724
CDC42EP3	6.71046e-55	2.25055e-50	0.609542
ATP1A1	3.01559e-54	1.01137e-49	0.942071
TACC1	3.7394e-54	1.25412e-49	0.818068
DPYSL2	5.49159e-54	1.84177e-49	0.469055
IER3	1.23253e-53	4.13367e-49	0.634838
SLC39A1	2.03991e-53	6.84144e-49	0.461026
GUK1	2.11528e-53	7.09422e-49	0.794042
FCGRT	2.7394e-53	9.18738e-49	0.51786
ZEB1	2.95394e-53	9.90692e-49	0.518337
BCAP29	6.9483e-53	2.33032e-48	0.514793
ROCK2	7.58952e-53	2.54537e-48	0.383884
LPAR6	1.01796e-52	3.41405e-48	0.40589
DDAH2	3.55999e-52	1.19395e-47	0.551748
TSPAN13	1.13742e-51	3.81467e-47	0.571983
S100A10	1.82393e-50	6.11711e-46	0.812914
MEF2C	2.55251e-50	8.5606e-46	0.542738
IFITM1	3.29849e-50	1.10625e-45	0.800198
ACTG1	6.40633e-50	2.14856e-45	0.63853
YPEL2	1.24091e-49	4.16177e-45	0.456234
ITGB1	1.27793e-49	4.28591e-45	0.674316
SORBS3	3.85986e-49	1.29452e-44	0.488331
AHR	4.38895e-49	1.47197e-44	0.495222
KBTBD2	1.10759e-48	3.71464e-44	0.440165
IL1R1	1.74907e-48	5.86603e-44	0.48147
GNG5	1.76148e-48	5.90766e-44	0.672737
CDC37	2.86955e-48	9.6239e-44	0.750201
DYNLL1	4.8552e-48	1.62834e-43	0.757279
SUN1	1.90059e-47	6.37419e-43	0.410311
HIPK3	7.32401e-47	2.45633e-42	0.522257
CD63	2.22188e-46	7.45173e-42	0.534638
SLK	1.21052e-45	4.05983e-41	0.350496
MIDN	1.34049e-45	4.49574e-41	0.759739
TAX1BP3	2.66264e-45	8.92995e-41	0.395874
SLC25A25	4.7459e-45	1.59168e-40	0.438962
NR4A1	1.02681e-44	3.44372e-40	0.826623
CEP68	2.05453e-44	6.89049e-40	0.369601
SVIL	2.20525e-44	7.39596e-40	0.31829
BCL2L1	3.66416e-44	1.22889e-39	0.471856
SEM1	4.76973e-44	1.59967e-39	0.650815
HDAC7	7.19088e-44	2.41168e-39	0.399219
TIMP1	7.34259e-44	2.46256e-39	0.31457
ATOX1	9.3583e-44	3.13859e-39	0.564419
ITM2B	9.36201e-44	3.13983e-39	0.67691
TPM1	9.61616e-44	3.22507e-39	0.346967
CALU	1.1218e-43	3.76228e-39	0.388323
LDLR	1.31422e-42	4.40764e-38	0.507504
LPCAT4	2.62466e-42	8.80259e-38	0.374286
ATF3	2.95309e-42	9.90408e-38	0.775344
TNFSF10	3.1643e-42	1.06124e-37	0.324397
HSBP1	4.91386e-42	1.64801e-37	0.530928
YWHAE	5.34115e-42	1.79132e-37	0.552416
BEX3	7.20966e-42	2.41798e-37	0.373125
SERTAD1	9.82789e-42	3.29608e-37	0.706505
MAP1B	1.47294e-41	4.93994e-37	0.36492
PARVB	2.22794e-41	7.47208e-37	0.413942
FRMD4B	2.43576e-41	8.16906e-37	0.366034
NPC2	4.74462e-41	1.59125e-36	0.858405
RTL8C	8.21641e-41	2.75562e-36	0.500254
TRIB1	8.63863e-41	2.89722e-36	0.461208
MYC	1.04888e-40	3.51773e-36	0.52658
MEF2A	1.32083e-40	4.42978e-36	0.533897
MYO1E	2.01399e-40	6.75452e-36	0.412685
SYNE2	2.52215e-40	8.45878e-36	0.556114
SEC14L1	3.2537e-40	1.09122e-35	0.556867
SPAG9	6.13055e-40	2.05606e-35	0.51809
LTBR	1.00324e-39	3.36468e-35	0.33704
KTN1	1.21016e-39	4.05864e-35	0.622469
GRAMD1A	2.00039e-39	6.70889e-35	0.477405
PRDX1	3.34394e-39	1.12149e-34	0.61142
RFK	3.86085e-39	1.29485e-34	0.36741
DYNC1LI2	4.70084e-39	1.57657e-34	0.432023
MARCKSL1	7.14768e-39	2.39719e-34	0.623193
PPM1D	1.15733e-38	3.88147e-34	0.429811
MRPL33	1.44949e-38	4.86129e-34	0.721482
RALB	1.55581e-38	5.21788e-34	0.374815
SNHG7	1.63754e-38	5.49197e-34	0.727358
VAMP3	1.91452e-38	6.42093e-34	0.48015
IFI16	2.03378e-38	6.8209e-34	0.548086
TAGLN2	3.98462e-38	1.33636e-33	0.571391
CRTAP	4.80896e-38	1.61283e-33	0.498235
CSRP1	7.01065e-38	2.35123e-33	0.517161
SRP14	1.14328e-37	3.83432e-33	0.852971
MGST3	1.15843e-37	3.88514e-33	0.518636
MAP4	1.21169e-37	4.06377e-33	0.46532
PHLDA1	6.62572e-37	2.22213e-32	0.672707
TMEM173	8.42579e-37	2.82584e-32	0.434389
CTNNB1	1.03076e-36	3.45698e-32	0.627588
PRDX4	1.71154e-36	5.74017e-32	0.362376
C5orf24	2.20984e-36	7.41136e-32	0.35106
YWHAH	4.18958e-36	1.4051e-31	0.597391
F2R	5.50057e-36	1.84478e-31	0.33351
MT2A	1.03921e-35	3.48531e-31	0.26253
MAP1LC3A	1.12349e-35	3.76795e-31	0.440022
NOP10	1.53626e-35	5.15232e-31	0.456016
PML	2.85933e-35	9.58963e-31	0.342319
FOSL2	3.82854e-35	1.28402e-30	0.504082
CAPNS1	1.19915e-34	4.0217e-30	0.524677
RTL8A	2.69631e-34	9.04289e-30	0.37523
MYL6	3.44777e-34	1.15631e-29	0.386532
MACF1	3.62505e-34	1.21577e-29	0.507736
ANKRD28	4.8729e-34	1.63427e-29	0.467083
WASL	5.51294e-34	1.84893e-29	0.304989
TIMP2	6.56287e-34	2.20105e-29	0.300575
GRASP	1.67186e-33	5.60708e-29	0.362312
NUDT14	1.89596e-33	6.35868e-29	0.394662
MYL12B	1.99139e-33	6.67871e-29	0.57434
MIR22HG	2.4682e-33	8.27784e-29	0.489556
TCEAL4	6.30387e-33	2.11419e-28	0.311734
TXN	6.5507e-33	2.19697e-28	0.4377
NME2	7.12401e-33	2.38925e-28	0.567991
SBNO2	7.709e-33	2.58545e-28	0.333285
SERPINB6	9.33673e-33	3.13135e-28	0.386427
LAP3	1.39559e-32	4.68054e-28	0.516445
VCL	1.67723e-32	5.62509e-28	0.29615
CMIP	3.2919e-32	1.10404e-27	0.400358
RELL1	8.04245e-32	2.69728e-27	0.344488
STX12	1.30195e-31	4.36649e-27	0.405319
TUBB	3.13386e-31	1.05103e-26	0.45508
NUCB1	3.70084e-31	1.24119e-26	0.512417
PTMA	5.69326e-31	1.9094e-26	0.387434
NAA38	1.18034e-30	3.95863e-26	0.540988
YWHAG	5.34035e-30	1.79105e-25	0.36134
SNX3	5.51708e-30	1.85032e-25	0.671804
SPTLC2	5.95188e-30	1.99614e-25	0.363896
EI24	1.79304e-29	6.0135e-25	0.355791
PEF1	2.76228e-29	9.26415e-25	0.362483
ANXA5	3.45838e-29	1.15987e-24	0.410761
ITPRIP	4.135e-29	1.3868e-24	0.306996
LTBP3	5.08746e-29	1.70623e-24	0.250082
PITPNB	5.15631e-29	1.72932e-24	0.441475
TMOD3	6.13622e-29	2.05797e-24	0.348559
FOS	7.99005e-29	2.6797e-24	0.741269
MYH9	8.2327e-29	2.76108e-24	0.599771
FLYWCH2	1.05162e-28	3.52692e-24	0.404229
MSN	1.09337e-28	3.66693e-24	0.510241
BAIAP2	2.37123e-28	7.95263e-24	0.290208
CAMTA1	4.36978e-28	1.46554e-23	0.392602
MARCKS	6.74446e-28	2.26196e-23	0.260582
GNB1	1.25501e-27	4.20906e-23	0.408532
GNAS	1.55818e-27	5.22583e-23	0.578406
SCARB2	3.87034e-27	1.29804e-22	0.313527
TMEM109	6.11349e-27	2.05034e-22	0.412776
TMEM14C	8.29907e-27	2.78334e-22	0.420038
MOB2	8.54683e-27	2.86644e-22	0.374911
FOSB	1.05159e-26	3.52681e-22	0.559307
SLC38A2	1.19616e-26	4.01168e-22	0.597879
MYL12A	2.12075e-26	7.11257e-22	0.400086
LRCH1	2.29601e-26	7.70035e-22	0.269774
CHMP5	2.31832e-26	7.7752e-22	0.298856
VAMP5	4.61596e-26	1.5481e-21	0.732607
BCL3	8.58707e-26	2.87993e-21	0.399392
LAPTM4A	1.00593e-25	3.3737e-21	0.504777
TNFRSF10B	1.37518e-25	4.61209e-21	0.264996
QKI	1.4549e-25	4.87945e-21	0.280853
TPM3	1.53137e-25	5.1359e-21	0.513546
TSPAN14	3.0402e-25	1.01962e-20	0.327621
KLF9	3.59565e-25	1.20591e-20	0.401439
ESF1	4.45831e-25	1.49523e-20	0.267271
HLA-DRB1	5.69435e-25	1.90977e-20	0.305514
KLF10	8.64165e-25	2.89824e-20	0.480014
CARHSP1	9.99445e-25	3.35194e-20	0.461596
GNAI2	1.17331e-24	3.93505e-20	0.332572
RSU1	1.33143e-24	4.46537e-20	0.367099
PLA2G16	1.40967e-24	4.72775e-20	0.299591
CXCL2	1.50234e-24	5.03856e-20	0.656337
GADD45B	2.0535e-24	6.88701e-20	0.85371
ITM2A	2.93668e-24	9.84905e-20	0.435581
ARPC5L	3.75149e-24	1.25817e-19	0.37208
TMEM14A	4.51246e-24	1.51339e-19	0.320273
CAPZA2	6.28499e-24	2.10786e-19	0.407774
ABI3	7.56801e-24	2.53816e-19	0.319762
FIS1	8.60364e-24	2.88549e-19	0.419445
ZNHIT1	9.59581e-24	3.21824e-19	0.404776
MAFF	1.81342e-23	6.08185e-19	0.313302
EBPL	1.95855e-23	6.56858e-19	0.339203
HSD17B12	2.07352e-23	6.95417e-19	0.288679
EIF4G1	3.31689e-23	1.11242e-18	0.391817
REXO2	3.59358e-23	1.20521e-18	0.382601
ZFP36	3.82077e-23	1.28141e-18	0.581449
NBDY	4.1465e-23	1.39065e-18	0.426447
AFF1	5.20554e-23	1.74583e-18	0.28324
ITGAV	6.81919e-23	2.28702e-18	0.425456
PPA1	8.28479e-23	2.77855e-18	0.705054
PHACTR4	1.34808e-22	4.52119e-18	0.293371
PRMT1	2.27371e-22	7.62557e-18	0.502617
EPN1	2.96145e-22	9.9321e-18	0.304525
PGRMC1	3.19616e-22	1.07193e-17	0.302009
TMEM70	3.26322e-22	1.09442e-17	0.386711
TMBIM1	3.66217e-22	1.22822e-17	0.368086
SERF2	3.98766e-22	1.33738e-17	0.33564
IKBIP	4.13913e-22	1.38818e-17	0.295794
MED13L	4.2527e-22	1.42627e-17	0.272221
SDCBP	5.71825e-22	1.91779e-17	0.369348
SPTAN1	9.49522e-22	3.18451e-17	0.337461
CD36	9.77405e-22	3.27802e-17	0.621289
MRPL32	1.07264e-21	3.59742e-17	0.297793
MPV17	1.11098e-21	3.72601e-17	0.279899
PXN	1.31443e-21	4.40834e-17	0.263396
UTRN	2.09506e-21	7.02642e-17	0.469643
WASF2	6.71362e-21	2.25161e-16	0.413173
VAPA	7.8838e-21	2.64407e-16	0.395086
NEAT1	9.10681e-21	3.05424e-16	0.312572
PSMD12	1.90375e-20	6.38479e-16	0.31116
MGMT	1.96495e-20	6.59004e-16	0.312969
TMEM165	2.10041e-20	7.04436e-16	0.331607
AHNAK	3.70825e-20	1.24367e-15	0.437276
XAF1	3.79145e-20	1.27158e-15	0.291337
GAPDH	5.46914e-20	1.83424e-15	0.29719
FURIN	6.19142e-20	2.07648e-15	0.26237
WDR83OS	8.92051e-20	2.99176e-15	0.402462
BANF1	9.55482e-20	3.20449e-15	0.363747
NFAT5	1.2902e-19	4.32707e-15	0.35849
ZBTB20	2.05482e-19	6.89146e-15	0.345459
KDELR1	2.57855e-19	8.64795e-15	0.250863
ZNF593	3.13521e-19	1.05149e-14	0.298703
RBKS	3.95023e-19	1.32483e-14	0.422923
IER2	4.06872e-19	1.36457e-14	0.4491
CYTH2	4.13693e-19	1.38744e-14	0.265375
DNAJA1	4.58625e-19	1.53814e-14	0.408826
SYNJ2	4.81763e-19	1.61574e-14	0.336151
HERC2	9.95353e-19	3.33821e-14	0.325471
GNG10	1.9708e-18	6.60967e-14	0.342435
MIR4435-2HG	2.14703e-18	7.2007e-14	0.382456
ATP5PF	2.51782e-18	8.44425e-14	0.429104
TM9SF2	2.99389e-18	1.00409e-13	0.374406
NAA10	3.09796e-18	1.03899e-13	0.321698
GINM1	4.40811e-18	1.47839e-13	0.297766
HNRNPAB	4.52486e-18	1.51755e-13	0.369729
SHISA5	4.79483e-18	1.60809e-13	0.323768
SYPL1	5.1173e-18	1.71624e-13	0.388801
PFDN2	7.6833e-18	2.57683e-13	0.359221
ELOC	8.53992e-18	2.86412e-13	0.454933
DAD1	9.80211e-18	3.28743e-13	0.397921
FDPS	1.02503e-17	3.43774e-13	0.327955
MBNL2	1.04278e-17	3.49727e-13	0.298702
CD99	1.44507e-17	4.84647e-13	0.365839
NDUFC1	3.02603e-17	1.01487e-12	0.29034
HSP90AB1	3.27294e-17	1.09768e-12	0.281547
HIF1A	3.35604e-17	1.12555e-12	0.357966
SNRK	7.47569e-17	2.5072e-12	0.342469
TMEM30A	1.61105e-16	5.40314e-12	0.291452
CLIC1	2.09607e-16	7.02979e-12	0.328847
ZYX	2.13194e-16	7.1501e-12	0.293935
SMIM37	2.27066e-16	7.61534e-12	0.288583
ELMO1	2.36008e-16	7.91524e-12	0.331141
ADD1	3.57965e-16	1.20054e-11	0.347284
GIMAP7	6.43628e-16	2.1586e-11	0.369461
SEC11A	7.20969e-16	2.41798e-11	0.301597
NUTF2	7.42419e-16	2.48993e-11	0.313655
KDELR2	7.78058e-16	2.60945e-11	0.30378
CDK4	9.09797e-16	3.05128e-11	0.304009
RHEB	9.37741e-16	3.145e-11	0.260474
DYNLRB1	1.13433e-15	3.80433e-11	0.374624
TUBB4B	1.63381e-15	5.47948e-11	0.409651
LRRFIP2	1.83595e-15	6.1574e-11	0.289022
HMGN3	1.91376e-15	6.41838e-11	0.41537
MAP1LC3B	1.98783e-15	6.6668e-11	0.432327
SYNCRIP	2.25679e-15	7.56883e-11	0.259838
ATP1B3	2.58268e-15	8.66179e-11	0.310816
ENY2	3.11876e-15	1.04597e-10	0.32688
RABAC1	3.97229e-15	1.33223e-10	0.279008
TSC22D2	4.00357e-15	1.34272e-10	0.365398
BCAP31	4.24774e-15	1.42461e-10	0.31403
POLE4	4.60861e-15	1.54563e-10	0.315035
CEBPD	8.38216e-15	2.81121e-10	0.280058
METAP2	1.05014e-14	3.52194e-10	0.311444
POMP	1.45431e-14	4.87745e-10	0.406816
EIF3I	1.91967e-14	6.43817e-10	0.351391
2021-09-02	2.2417e-14	7.51821e-10	0.300537
MTCH1	2.33735e-14	7.83899e-10	0.291705
EIF5B	2.72907e-14	9.15275e-10	0.273236
SERBP1	2.90564e-14	9.74495e-10	0.342095
RAB6A	2.90647e-14	9.74771e-10	0.280936
PIM3	3.0505e-14	1.02308e-09	0.444793
FRYL	3.70162e-14	1.24145e-09	0.275753
RGCC	4.26572e-14	1.43064e-09	0.607058
RRP12	4.36294e-14	1.46324e-09	0.280434
SH3BP5	4.41162e-14	1.47957e-09	0.266492
JUND	5.15152e-14	1.72772e-09	0.406495
TUBA1B	6.83509e-14	2.29235e-09	0.296027
LSM2	7.33399e-14	2.45967e-09	0.260072
COX17	8.12043e-14	2.72343e-09	0.342144
CDK17	8.40635e-14	2.81932e-09	0.311403
JMJD1C	1.95768e-13	6.56568e-09	0.323265
TMEM219	1.98487e-13	6.65684e-09	0.261397
GLUL	2.79674e-13	9.37969e-09	0.320015
POLR2L	3.92636e-13	1.31682e-08	0.320447
NASP	4.6748e-13	1.56783e-08	0.277439
NDUFA12	5.14893e-13	1.72685e-08	0.337254
RNF145	5.54392e-13	1.85932e-08	0.266655
TMEM35B	7.88656e-13	2.64499e-08	0.268137
NUCKS1	8.4254e-13	2.82571e-08	0.306776
SRSF4	9.40495e-13	3.15423e-08	0.265474
INSIG1	1.23496e-12	4.14179e-08	0.355803
MT-ND4	1.36158e-12	4.56647e-08	0.319735
PPIA	2.41346e-12	8.09426e-08	0.286691
MT-ND2	2.58899e-12	8.68295e-08	0.316788
ATF4	3.20485e-12	1.07484e-07	0.321132
SRI	3.528e-12	1.18322e-07	0.312039
IFI6	4.12791e-12	1.38442e-07	0.267004
PPP1R15A	4.56237e-12	1.53013e-07	0.373399
SLC2A3	4.94495e-12	1.65844e-07	0.462227
AP2M1	5.28384e-12	1.77209e-07	0.258638
APPL1	5.8711e-12	1.96905e-07	0.287292
MIF	6.01032e-12	2.01574e-07	0.250831
PRDX6	9.56948e-12	3.20941e-07	0.309816
CLTA	1.67128e-11	5.60514e-07	0.253364
CSNK1A1	3.00148e-11	1.00664e-06	0.283407
EIF4G2	4.56878e-11	1.53228e-06	0.316162
MLEC	7.48077e-11	2.5089e-06	0.375789
TOMM5	7.92635e-11	2.65834e-06	0.250564
JUNB	9.11992e-11	3.05864e-06	0.376328
RNH1	1.30912e-10	4.39053e-06	0.282297
ZFP36L1	1.69883e-10	5.69753e-06	0.259198
RHOA	2.23912e-10	7.50957e-06	0.293292
HNRNPD	3.15304e-10	1.05747e-05	0.271089
CCT6A	3.50878e-10	1.17678e-05	0.270979
KLF2	5.21246e-10	1.74815e-05	0.43492
SET	5.9869e-10	2.00789e-05	0.303169
SNRPD1	6.47708e-10	2.17228e-05	0.277507
DDX21	1.01307e-09	3.39764e-05	0.307057
RPS4Y1	1.34569e-09	4.51317e-05	0.396814
WSB1	1.36123e-09	4.56531e-05	0.274065
SERINC3	1.54446e-09	5.17979e-05	0.261723
DDX3X	2.52252e-09	8.46001e-05	0.289591
MCRIP1	2.63239e-09	8.82852e-05	0.275347
NEDD8	4.09201e-09	0.000137238	0.258694
ARGLU1	8.5091e-09	0.000285378	0.277413
MRPL51	1.20624e-08	0.000404548	0.269764
CCDC124	1.79547e-08	0.000602166	0.272568
GTF2A2	3.30888e-08	0.00110973	0.259321
ERH	3.84921e-08	0.00129095	0.292335
CCNL1	5.49163e-08	0.00184178	0.312545
RNF7	7.32679e-08	0.00245726	0.270183
SLC3A2	8.62358e-08	0.00289218	0.332298
ISG15	3.24015e-07	0.0108668	0.354516
MRFAP1	3.42795e-07	0.0114967	0.271171
MRPS21	5.09681e-07	0.0170937	0.261624
SNRPF	6.70922e-07	0.0225014	0.264788

## Sheet: 5
gene	p_val	p_val_adj	avg_logFC
FCGR3B	0	0	3.59057
S100A8	0	0	3.20912
CMTM2	0	0	3.14158
S100A9	2.59211e-247	8.69343e-243	2.16551
CXCR2	2.41393e-243	8.09583e-239	2.29313
G0S2	5.65263e-229	1.89578e-224	2.61391
MNDA	2.47998e-212	8.31735e-208	2.81113
S100A12	6.24241e-198	2.09358e-193	2.95569
HBB	4.14643e-177	1.39063e-172	2.5531
IFITM2	1.77261e-168	5.94496e-164	3.26538
NAMPT	2.94633e-151	9.88141e-147	2.7572
H3F3A	2.02629e-143	6.79576e-139	2.10186
S100A11	6.6876e-138	2.24289e-133	2.42124
B2M	3.99589e-111	1.34014e-106	1.01006
TYROBP	5.59819e-111	1.87752e-106	1.69049
FTH1	4.05645e-102	1.36045e-97	1.53335
S100A6	3.12542e-95	1.0482e-90	1.82969
PTGS2	3.26102e-92	1.09368e-87	2.43974
IFITM3	5.37838e-92	1.8038e-87	2.0429
GCA	7.3758e-92	2.47369e-87	2.52363
FTL	1.09165e-89	3.66119e-85	1.11995
AQP9	1.60061e-89	5.36812e-85	2.12285
LST1	3.12139e-84	1.04685e-79	2.18845
FPR1	4.76246e-83	1.59724e-78	2.22169
NEAT1	9.62359e-80	3.22756e-75	2.11743
ACTB	1.2096e-77	4.05677e-73	0.868152
CSF3R	2.56083e-75	8.58851e-71	2.4103
H3F3B	5.26669e-75	1.76634e-70	1.13797
ITM2B	3.56072e-74	1.19419e-69	1.75437
SRGN	2.93903e-69	9.85691e-65	1.1973
SLC25A37	3.70995e-66	1.24424e-61	2.39021
CDA	1.4654e-65	4.91467e-61	1.97003
SMIM25	3.86127e-64	1.29499e-59	2.01375
ALOX5AP	9.32542e-57	3.12756e-52	2.25135
SOD2	3.26029e-56	1.09344e-51	2.06497
BCL2A1	5.00962e-55	1.68012e-50	2.23816
CXCL8	5.63279e-54	1.88912e-49	2.05545
FCER1G	2.45734e-53	8.24142e-49	1.47355
SAT1	9.73115e-51	3.26363e-46	1.46681
S100A4	1.83879e-50	6.16693e-46	1.39571
ANP32A	1.02022e-49	3.42163e-45	2.34284
RGS2	6.49316e-45	2.17768e-40	1.98201
ATP5F1E	4.39385e-37	1.47361e-32	1.10127
DUSP1	2.52606e-32	8.47189e-28	1.19455
FOS	6.04061e-32	2.0259e-27	0.854227
SH3BGRL3	4.72e-30	1.583e-25	0.896439
MYL6	2.02612e-29	6.79519e-25	1.12614
C5AR1	1.04678e-28	3.51069e-24	1.6446
GABARAP	4.57387e-28	1.53398e-23	1.4095
IFITM1	1.62198e-27	5.43981e-23	1.24239
BASP1	1.91155e-27	6.41096e-23	1.80939
NCF1	1.94368e-23	6.51872e-19	1.90733
AIF1	3.41041e-23	1.14378e-18	1.46656
OST4	9.81659e-23	3.29229e-18	0.285916
TMBIM6	8.65974e-22	2.9043e-17	0.368766
LAMTOR4	1.12024e-21	3.75707e-17	1.91819
SPI1	9.38889e-21	3.14885e-16	1.69333
CCNL1	1.26892e-20	4.2557e-16	0.298419
DAZAP2	5.32934e-20	1.78735e-15	0.388587
PSME1	2.11288e-19	7.08617e-15	0.395732
BRK1	5.22029e-19	1.75078e-14	0.295918
PCBP1	1.0397e-18	3.48694e-14	0.38819
PAIP2	2.45197e-18	8.22341e-14	0.401711
CD53	3.22565e-18	1.08182e-13	0.250329
TMEM59	3.31693e-18	1.11243e-13	0.30949
SELL	6.06665e-18	2.03463e-13	1.60619
TAPBP	1.19298e-17	4.00101e-13	0.319188
DDX3X	1.45347e-17	4.87465e-13	0.463283
NEDD8	2.27138e-17	7.61776e-13	0.257874
ALDOA	3.74922e-17	1.25741e-12	0.312064
LRRFIP1	4.19035e-17	1.40536e-12	0.382504
UBE2D3	8.96039e-17	3.00513e-12	0.448368
ISG20	2.08352e-16	6.9877e-12	0.287829
OAZ1	3.45015e-16	1.15711e-11	1.01674
MYL12B	4.29676e-16	1.44105e-11	0.334513
DDX17	9.29666e-16	3.11791e-11	0.301418
CKLF	9.36853e-16	3.14202e-11	1.84664
PLP2	1.13816e-15	3.81715e-11	0.270248
SERPINA1	1.3082e-15	4.38744e-11	1.02238
TPM3	1.55472e-15	5.21422e-11	0.292507
STK17A	1.83259e-15	6.14615e-11	0.425797
CAPZA1	2.61439e-15	8.76813e-11	0.365973
NAPA	2.78881e-15	9.35311e-11	0.291336
PPP1CA	2.99297e-15	1.00378e-10	0.397941
JAK1	3.8691e-15	1.29762e-10	0.527456
ZC3HAV1	3.88357e-15	1.30247e-10	0.297122
SSU72	5.19661e-15	1.74284e-10	0.3145
NDUFA1	6.28931e-15	2.10931e-10	0.45986
CALM3	8.23272e-15	2.76109e-10	0.39408
TAF7	1.02921e-14	3.45175e-10	0.387451
FKBP5	1.19218e-14	3.99832e-10	0.43379
GLIPR1	1.48475e-14	4.97956e-10	0.319728
SYF2	1.94083e-14	6.50915e-10	0.425383
SERINC3	1.94645e-14	6.52802e-10	0.284911
KDM6B	3.02077e-14	1.01311e-09	0.266739
MYH9	3.60194e-14	1.20802e-09	0.534738
MBP	7.3761e-14	2.4738e-09	0.301689
SHISA5	7.56853e-14	2.53833e-09	0.350854
NIPBL	8.0926e-14	2.7141e-09	0.298311
PTP4A2	8.27283e-14	2.77454e-09	0.269795
PSMB8	8.80999e-14	2.95469e-09	0.351349
TRIM22	1.0546e-13	3.53691e-09	0.266538
PSMB3	1.73094e-13	5.80523e-09	0.422973
ATP6V0C	2.25643e-13	7.56763e-09	0.443504
UQCR11	2.32553e-13	7.79936e-09	0.476301
VAMP2	2.43442e-13	8.16454e-09	0.479999
KLF3	3.5829e-13	1.20163e-08	0.313144
RAB7A	3.68751e-13	1.23672e-08	0.407172
DBNL	4.02946e-13	1.3514e-08	0.263911
ROCK1	4.41179e-13	1.47963e-08	0.402213
MLF2	5.84879e-13	1.96157e-08	0.288452
CEBPB	6.84775e-13	2.2966e-08	1.61209
ACTN4	7.65978e-13	2.56894e-08	0.274964
MXD1	8.16898e-13	2.73971e-08	1.71683
WIPF1	8.89221e-13	2.98227e-08	0.400286
TNFRSF1B	9.81161e-13	3.29062e-08	0.278082
PDE4B	1.29896e-12	4.35647e-08	0.476591
RAB2A	2.1437e-12	7.18955e-08	0.454221
TXN	2.33024e-12	7.81517e-08	1.60959
TPR	2.55225e-12	8.55974e-08	0.358471
ABTB1	2.80901e-12	9.42084e-08	1.75987
AKNA	3.25641e-12	1.09213e-07	0.301936
MOB1A	3.45153e-12	1.15757e-07	0.469146
ATP5MPL	3.83496e-12	1.28617e-07	0.542035
SMIM26	4.13198e-12	1.38578e-07	0.391935
ACTR3	7.07655e-12	2.37333e-07	0.605432
CSTB	8.30092e-12	2.78396e-07	0.481175
CMTM6	1.08449e-11	3.63717e-07	0.513225
LAMTOR5	1.09911e-11	3.6862e-07	0.451601
TRAPPC1	1.14174e-11	3.82916e-07	0.514638
ARHGAP45	1.74854e-11	5.86424e-07	0.29479
MSN	1.90033e-11	6.37333e-07	0.586433
MALAT1	2.11145e-11	7.08137e-07	0.300826
HIF1A	2.20739e-11	7.40313e-07	0.484724
NFE2L2	2.2301e-11	7.4793e-07	0.417707
ACTR2	2.24151e-11	7.51758e-07	0.619634
XRN2	2.49637e-11	8.37234e-07	0.38065
TMX4	2.61749e-11	8.77854e-07	0.345039
TGFB1	3.97025e-11	1.33154e-06	0.465925
MAP1LC3B	5.39048e-11	1.80786e-06	0.627896
TAGAP	7.06009e-11	2.36781e-06	0.364483
ITGB2	7.41614e-11	2.48722e-06	0.357253
SSH2	7.52087e-11	2.52235e-06	0.490837
ATP6V0E1	1.151e-10	3.86023e-06	0.646573
PRKAR1A	1.33483e-10	4.47676e-06	0.55599
SH3KBP1	1.33992e-10	4.49383e-06	0.484246
ADGRE5	1.61626e-10	5.42063e-06	0.487124
ANXA11	1.63394e-10	5.47992e-06	0.613712
PRDX5	1.87065e-10	6.27378e-06	0.596221
RHOA	2.51358e-10	8.43003e-06	0.425829
RNF213	2.84921e-10	9.55569e-06	0.523232
RIPOR2	3.06049e-10	1.02643e-05	1.74417
PPT1	3.29178e-10	1.104e-05	0.376336
SLC9A3R1	5.26528e-10	1.76587e-05	0.311563
PPP4C	6.51378e-10	2.18459e-05	0.507672
GRB2	1.42701e-09	4.78591e-05	0.660578
GRINA	1.69253e-09	5.67641e-05	0.39077
PAK2	1.712e-09	5.74172e-05	0.702278
TMEM50A	1.88199e-09	6.31182e-05	0.68146
METTL9	1.88658e-09	6.3272e-05	0.508555
SEC62	2.55761e-09	8.5777e-05	0.671317
MMP24OS	2.75945e-09	9.25463e-05	0.432136
SCAF11	2.95069e-09	9.89602e-05	0.649531
BLOC1S1	3.40373e-09	0.000114154	0.439097
CHURC1	4.48888e-09	0.000150548	0.679028
PPP1R12A	4.78285e-09	0.000160407	0.460077
STK17B	4.95542e-09	0.000166195	0.628821
NDUFB1	5.69664e-09	0.000191054	0.588958
RBMS1	9.56631e-09	0.000320835	0.538798
ICAM3	1.31386e-08	0.000440642	0.732956
USP15	1.57729e-08	0.00052899	0.799488
CD37	1.71149e-08	0.000573998	0.403031
SAMSN1	2.9298e-08	0.000982598	0.522215
SUPT4H1	3.29518e-08	0.00110514	0.519663
SNX6	5.91291e-08	0.00198307	0.649982
UBL5	8.72491e-08	0.00292616	0.638716
CNN2	1.00969e-07	0.0033863	0.718673
OSTF1	1.0452e-07	0.00350539	0.682595
MTPN	1.13916e-07	0.00382051	0.584057
TALDO1	1.16957e-07	0.00392251	1.61907
CTSS	1.55164e-07	0.0052039	1.11628
ADIPOR1	1.88517e-07	0.00632247	0.611736
CNPY3	2.06363e-07	0.006921	0.648431
PGLS	2.08213e-07	0.00698304	0.521686
RAP1A	2.21112e-07	0.00741566	0.739615
CAPZA2	2.65842e-07	0.0089158	0.663217
SLC2A3	5.59281e-07	0.0187572	0.433299
IFRD1	5.9751e-07	0.0200393	0.76079
DOCK8	5.99346e-07	0.0201009	0.605696
RILPL2	6.24446e-07	0.0209427	0.573164
GNB2	6.57284e-07	0.022044	0.784038
MIDN	6.79357e-07	0.0227843	0.635654
NFKBIA	7.36933e-07	0.0247153	0.354861
CLEC2B	7.9919e-07	0.0268032	0.66633
BAZ1A	8.47417e-07	0.0284207	0.678658
WAS	1.23458e-06	0.0414052	0.770274

## Sheet: 6
gene	p_val	p_val_adj	avg_logFC
IGHG1	0	0	4.47622
IGHG4	0	0	3.21485
MZB1	0	0	2.81437
DERL3	0	0	2.01675
IGLL5	0	0	1.74066
TNFRSF17	0	0	0.913858
SDC1	0	0	0.770637
JCHAIN	2.00045e-268	6.70912e-264	3.78502
IGLV3-1	3.08866e-264	1.03587e-259	4.07578
IGKC	1.56334e-233	5.24314e-229	4.08038
TXNDC5	1.1298e-205	3.78913e-201	1.04545
IGHA2	1.21031e-162	4.05913e-158	2.88277
IGLC2	6.78064e-137	2.27409e-132	3.20231
PRDX4	1.34408e-118	4.50778e-114	1.24577
POU2AF1	3.11387e-101	1.04433e-96	0.778463
SSR4	7.47595e-92	2.50728e-87	1.56902
ITM2C	1.05991e-89	3.55472e-85	1.45287
FKBP11	1.69184e-85	5.6741e-81	1.34754
CD38	7.25619e-78	2.43358e-73	1.12137
FCRL5	2.93145e-74	9.83149e-70	0.486041
IGHA1	4.13771e-70	1.38771e-65	2.86748
SEC11C	3.67166e-67	1.2314e-62	1.34801
IGKV4-1	2.69309e-52	9.03208e-48	5.11415
XBP1	2.87994e-48	9.65875e-44	1.30543
HSP90B1	7.25725e-41	2.43394e-36	1.46098
FKBP2	1.38862e-40	4.65716e-36	0.683042
SDF2L1	1.20241e-36	4.03265e-32	0.86637
SSR3	9.52996e-35	3.19616e-30	0.952958
SPCS3	1.98369e-28	6.6529e-24	0.967609
CD27	2.04978e-28	6.87454e-24	0.809447
MANF	6.20851e-26	2.08221e-21	0.68283
ERLEC1	1.09343e-25	3.66716e-21	0.699854
MYDGF	1.36837e-25	4.58923e-21	1.17135
TXNDC15	8.29046e-23	2.78045e-18	0.334401
CRELD2	1.07458e-22	3.60392e-18	0.618302
LMAN1	7.63173e-22	2.55953e-17	0.856141
PDIA6	1.04935e-20	3.51932e-16	0.91566
PDIA4	6.60904e-19	2.21654e-14	0.939023
SPCS2	3.68604e-17	1.23622e-12	0.636729
HDLBP	3.95617e-15	1.32682e-10	0.538057
PPIB	1.42818e-13	4.78983e-09	1.10598
TXNDC11	2.03332e-13	6.81934e-09	0.387152
RRBP1	4.0977e-13	1.37429e-08	0.351079
UBE2J1	4.53825e-11	1.52204e-06	0.800948
SRPRB	7.26542e-11	2.43668e-06	0.272094
ARSA	1.75678e-10	5.89188e-06	0.287535
HERPUD1	1.07413e-09	3.60241e-05	0.490842
PLPP5	2.53665e-09	8.50743e-05	0.255072
SPCS1	1.94565e-08	0.000652532	0.604882
HM13	2.30585e-08	0.000773338	0.504923
RPN2	7.7274e-08	0.00259162	0.465414
SEC61A1	1.00068e-07	0.00335608	0.253412
KDELR1	1.13884e-07	0.00381944	0.42333
SELENOS	7.68871e-07	0.0257864	0.425218
KDELR2	8.67739e-07	0.0291022	0.580055
LMAN2	9.1194e-07	0.0305846	0.513637

## Sheet: 7
gene	p_val	p_val_adj	avg_logFC
GZMH	0	0	2.24322
FGFBP2	0	0	1.85609
GNLY	1.45577e-298	4.88237e-294	1.82322
CX3CR1	1.09363e-294	3.66783e-290	1.10567
FCRL6	3.37017e-284	1.13029e-279	1.0037
S1PR5	1.59371e-270	5.34498e-266	1.00565
ADGRG1	1.48691e-251	4.98681e-247	1.24279
NKG7	1.80002e-226	6.03692e-222	2.05405
KLRG1	2.86481e-220	9.60799e-216	1.18992
PRF1	1.14713e-215	3.84724e-211	1.341
GZMB	2.93822e-201	9.85419e-197	1.03461
LAIR2	1.29318e-180	4.33706e-176	1.14899
CCL5	3.20783e-176	1.07584e-171	1.61695
GZMA	4.69497e-155	1.5746e-150	1.2453
HOPX	1.88871e-151	6.33437e-147	1.18475
KLRD1	8.2812e-145	2.77735e-140	1.2523
CST7	9.20238e-135	3.0863e-130	1.17358
TRGV2	1.59496e-131	5.34917e-127	0.898331
CTSW	9.37937e-131	3.14565e-126	1.2229
TBX21	5.59319e-127	1.87584e-122	0.902246
IL32	1.59587e-126	5.35222e-122	1.366
CD3G	7.0179e-125	2.35366e-120	1.09326
PRSS23	1.5548e-119	5.2145e-115	0.703559
CCL4	3.53576e-111	1.18582e-106	1.0091
CD3D	1.76176e-104	5.9086e-100	1.02305
SAMD3	2.40921e-104	8.08e-100	0.864931
GZMM	5.16011e-103	1.7306e-98	0.99523
B2M	2.40562e-96	8.06797e-92	0.668053
SLC9A3R1	2.30024e-93	7.71454e-89	1.1024
CD3E	7.37233e-89	2.47253e-84	0.999141
MATK	1.66178e-85	5.57329e-81	0.780899
PYHIN1	2.00663e-84	6.72984e-80	0.668547
LCK	2.14612e-84	7.19766e-80	0.915558
CD52	2.44073e-78	8.18571e-74	1.06578
MYBL1	7.43292e-78	2.49285e-73	0.593663
TTC38	1.47335e-74	4.94131e-70	0.678129
HCST	3.68473e-74	1.23579e-69	0.977602
MYL12A	1.87831e-73	6.29949e-69	0.918497
CD2	4.65955e-73	1.56272e-68	0.807226
HLA-C	4.65976e-73	1.56279e-68	0.69288
CD8B	2.13882e-72	7.17316e-68	1.04588
SPON2	1.682e-71	5.64111e-67	0.714435
PLEK	1.97995e-69	6.64035e-65	0.755208
PFN1	1.59306e-68	5.3428e-64	0.769985
BIN2	4.65664e-66	1.56174e-61	0.759101
RARRES3	3.86599e-65	1.29658e-60	0.860539
S100A4	1.71638e-64	5.75639e-60	0.79183
CD8A	1.78025e-64	5.97061e-60	0.901658
PTPRCAP	2.27162e-64	7.61856e-60	0.869778
C12orf75	2.21525e-63	7.4295e-59	0.695767
ITGB2	5.36527e-63	1.7994e-58	0.866148
CD320	3.23394e-62	1.0846e-57	0.694521
LINC01871	1.99113e-61	6.67786e-57	0.663982
AES	1.01945e-60	3.41902e-56	0.833469
LYAR	4.27972e-60	1.43533e-55	0.766236
HLA-B	7.18928e-60	2.41114e-55	0.894026
CHST12	1.0774e-59	3.61339e-55	0.638406
CD99	1.09296e-58	3.66557e-54	0.743302
ITGB7	1.31176e-58	4.39939e-54	0.664759
IFITM1	1.70019e-58	5.70209e-54	0.693654
SH3BGRL3	2.13575e-58	7.16289e-54	0.695899
CTSC	1.82731e-57	6.12842e-53	0.639306
TRG-AS1	3.53801e-57	1.18658e-52	0.486598
CD247	3.52516e-56	1.18227e-51	0.680963
PLEKHF1	5.38704e-56	1.80671e-51	0.516562
GIMAP4	2.96301e-54	9.93736e-50	0.673671
LAT	1.49504e-53	5.01407e-49	0.657486
C1orf21	4.67244e-53	1.56704e-48	0.508096
FCGR3A	9.41143e-51	3.15641e-46	0.556138
SPN	3.55843e-50	1.19342e-45	0.710309
KLRC3	2.35683e-49	7.90435e-45	0.613297
SUN2	3.34289e-49	1.12114e-44	0.699353
CALHM2	4.02436e-49	1.34969e-44	0.47146
EFHD2	4.14023e-49	1.38855e-44	0.731837
RAC2	4.89102e-49	1.64035e-44	0.704601
RAP1B	9.87789e-49	3.31285e-44	0.72892
LY6E	2.54219e-48	8.52599e-44	0.708093
CDC25B	3.85437e-48	1.29268e-43	0.607295
EMP3	8.3312e-48	2.79412e-43	0.704544
ZAP70	1.14144e-47	3.82816e-43	0.64959
FLNA	1.40585e-47	4.71494e-43	0.703736
ITGB1	2.78102e-47	9.327e-43	0.796932
GIMAP7	7.92072e-47	2.65645e-42	0.715499
PPP1R18	1.71445e-46	5.74991e-42	0.651603
RAB29	1.96411e-45	6.58724e-41	0.585907
C11orf21	2.10205e-45	7.04986e-41	0.445192
AC116366.3	3.44928e-45	1.15682e-40	0.489667
PTPN4	6.02297e-45	2.01999e-40	0.593862
DIP2A	2.19682e-44	7.36771e-40	0.616095
MYO1G	3.03017e-43	1.01626e-38	0.633245
LITAF	2.97743e-42	9.98572e-38	0.539387
ZBTB38	9.41991e-42	3.15925e-37	0.567907
LINC00861	1.17009e-41	3.92425e-37	0.477795
APOBEC3G	3.9258e-41	1.31663e-36	0.575182
PAXX	1.01997e-40	3.42078e-36	0.682409
BTN3A2	1.09366e-40	3.66793e-36	0.615164
RAB37	1.10454e-40	3.70439e-36	0.450806
PPP1CA	3.29999e-40	1.10675e-35	0.584875
GBP5	8.34229e-40	2.79784e-35	0.509611
SELPLG	1.13054e-39	3.79162e-35	0.597178
SSBP4	1.33795e-39	4.4872e-35	0.580874
ARL6IP5	1.3415e-39	4.49911e-35	0.623687
TRAF3IP3	4.3575e-39	1.46142e-34	0.617085
TMSB10	4.8091e-39	1.61288e-34	0.432232
CEP78	1.16996e-38	3.92383e-34	0.460016
ITGAL	1.9526e-38	6.54863e-34	0.583445
TPST2	2.47353e-38	8.29572e-34	0.571115
ANXA6	3.06382e-38	1.02754e-33	0.63989
LIME1	9.80193e-38	3.28737e-33	0.597753
CLIC3	1.2947e-37	4.34216e-33	0.495244
MYO1F	1.34604e-37	4.51435e-33	0.456187
HLA-E	2.04098e-37	6.84503e-33	0.482286
RPS3	2.20972e-37	7.41096e-33	0.385541
CALM1	2.66712e-37	8.945e-33	0.49436
THEMIS	5.85509e-37	1.96368e-32	0.488003
PPP2R5C	2.3305e-36	7.81603e-32	0.565366
RPS6KA1	4.50249e-36	1.51005e-31	0.430372
PSMB9	5.64469e-36	1.89312e-31	0.584383
SYNE1	1.27012e-35	4.25974e-31	0.598443
CCND3	1.75889e-35	5.89897e-31	0.55809
LGALS1	6.96653e-35	2.33643e-30	0.539826
TMSB4X	1.0676e-34	3.58053e-30	0.387463
RPS29	2.10444e-34	7.05786e-30	0.485262
DOK2	5.49526e-34	1.843e-29	0.499256
PRMT2	1.13765e-33	3.81544e-29	0.586859
PPIA	9.73086e-33	3.26354e-28	0.406899
SYNE2	9.85299e-33	3.3045e-28	0.555581
LAG3	1.69007e-32	5.66817e-28	0.420328
RASSF1	2.14603e-32	7.19737e-28	0.547406
CLEC2D	2.34156e-32	7.85311e-28	0.5873
RPS27	2.53841e-32	8.51333e-28	0.402302
EVL	3.06406e-32	1.02763e-27	0.551395
TGFBR3	4.74881e-32	1.59266e-27	0.481351
ABI3	4.99642e-32	1.6757e-27	0.488416
PTP4A2	1.26368e-31	4.23814e-27	0.523926
TRBC2	4.2862e-31	1.43751e-26	0.477541
CD5	7.35411e-31	2.46642e-26	0.485237
PXN	9.38925e-31	3.14897e-26	0.513587
HLA-A	2.19672e-30	7.36735e-26	0.401249
SH2D2A	4.73622e-30	1.58843e-25	0.590811
TSEN54	5.77388e-30	1.93644e-25	0.522491
LSP1	1.4901e-29	4.9975e-25	0.43951
CD300A	1.91316e-29	6.41637e-25	0.457868
CAPN2	2.02532e-29	6.79252e-25	0.508282
ARPC2	2.05078e-29	6.87789e-25	0.466845
ARPC5L	2.60834e-29	8.74786e-25	0.527114
RPL23A	5.15093e-29	1.72752e-24	0.38683
IL10RA	1.31277e-28	4.40277e-24	0.55789
CORO1A	2.23278e-28	7.4883e-24	0.490517
PTGER2	2.69559e-28	9.04046e-24	0.475294
TMEM173	5.96607e-28	2.0009e-23	0.479116
AHNAK	7.64414e-28	2.56369e-23	0.477257
TAP1	8.22848e-28	2.75967e-23	0.466236
CDK2AP2	9.21564e-28	3.09074e-23	0.544147
RPL26	1.23115e-27	4.12902e-23	0.344403
CD6	1.90694e-27	6.39549e-23	0.531422
F2R	2.66029e-27	8.92207e-23	0.427588
ADRB2	2.83984e-27	9.52425e-23	0.373014
LCP2	3.17712e-27	1.06554e-22	0.499554
CFL1	3.80738e-27	1.27692e-22	0.39372
MYL12B	6.92196e-27	2.32149e-22	0.410613
S100A10	7.85508e-27	2.63444e-22	0.261667
CCDC88C	1.31303e-26	4.40364e-22	0.448662
APMAP	1.42466e-26	4.77804e-22	0.456632
IL2RG	4.58447e-26	1.53754e-21	0.460331
CYFIP2	5.29266e-26	1.77505e-21	0.464588
PSME1	1.6631e-25	5.57771e-21	0.473758
CMC1	1.95001e-25	6.53994e-21	0.579273
NFATC2	2.41832e-25	8.11056e-21	0.444563
SKAP1	3.01577e-25	1.01143e-20	0.465565
FGR	3.14329e-25	1.0542e-20	0.298087
APBB1IP	5.28884e-25	1.77377e-20	0.413112
SIT1	5.35146e-25	1.79477e-20	0.399815
DGKZ	5.4225e-25	1.8186e-20	0.451626
RNF166	9.34792e-25	3.1351e-20	0.4725
UCP2	1.74904e-24	5.86594e-20	0.512414
ARL4C	3.30244e-24	1.10757e-19	0.463586
RASAL3	4.38838e-24	1.47178e-19	0.431159
PPP3CC	6.45364e-24	2.16442e-19	0.529812
LPCAT1	8.68199e-24	2.91176e-19	0.409854
TRAC	9.78188e-24	3.28065e-19	0.38038
TXNIP	1.17444e-23	3.93883e-19	0.449019
CRIP1	1.93701e-23	6.49634e-19	0.409721
CYTH4	2.57439e-23	8.63398e-19	0.364509
PTPN7	4.45067e-23	1.49266e-18	0.39669
TSC22D4	6.48282e-23	2.17421e-18	0.436
SASH3	9.10239e-23	3.05276e-18	0.47681
CD48	9.56528e-23	3.208e-18	0.426107
SH3BP1	1.0285e-22	3.44937e-18	0.366388
TGFB1	1.5449e-22	5.18128e-18	0.383825
BIN1	1.57004e-22	5.26559e-18	0.480845
TRBC1	3.04236e-22	1.02035e-17	0.46673
ZEB2	3.10915e-22	1.04275e-17	0.43119
BUB3	4.41796e-22	1.4817e-17	0.430889
SYTL1	1.70678e-21	5.7242e-17	0.441445
FYN	1.71041e-21	5.73637e-17	0.406381
DHRS7	1.7318e-21	5.8081e-17	0.388956
TBC1D10C	2.07347e-21	6.954e-17	0.458134
ARF6	2.28098e-21	7.64994e-17	0.452108
ID2	4.53553e-21	1.52113e-16	0.386271
TMC6	7.44507e-21	2.49693e-16	0.413972
PSMB10	8.63557e-21	2.8962e-16	0.444416
CLEC2B	1.46817e-20	4.92394e-16	0.333296
STK38	1.87794e-20	6.29822e-16	0.374703
FBXW5	2.04848e-20	6.8702e-16	0.405972
LBH	5.32167e-20	1.78478e-15	0.45139
PDLIM2	5.33235e-20	1.78836e-15	0.347088
PSMB8	5.75618e-20	1.93051e-15	0.459737
RPS4X	6.68421e-20	2.24175e-15	0.273552
CAP1	6.99846e-20	2.34714e-15	0.386826
ITGA4	1.01696e-19	3.41069e-15	0.488104
RHOF	1.32399e-19	4.44039e-15	0.392808
STOM	1.37036e-19	4.59592e-15	0.351579
RNF126	1.50443e-19	5.04556e-15	0.400848
S1PR4	2.29471e-19	7.69601e-15	0.489805
SCML4	2.36607e-19	7.93533e-15	0.325716
GIMAP1	2.76921e-19	9.28737e-15	0.345839
KLF2	3.01105e-19	1.00985e-14	0.351055
CLIC1	4.13091e-19	1.38542e-14	0.341707
HLA-F	5.43865e-19	1.82401e-14	0.393142
ARHGAP25	7.2048e-19	2.41634e-14	0.388245
P2RY8	9.80122e-19	3.28713e-14	0.413343
ARHGAP30	1.00484e-18	3.37002e-14	0.378061
RPL36A	1.05001e-18	3.52152e-14	0.353256
GUK1	1.07811e-18	3.61577e-14	0.311375
ACTB	1.7826e-18	5.97849e-14	0.253094
GPSM3	1.84717e-18	6.19502e-14	0.369741
PTPRC	2.21471e-18	7.42771e-14	0.335977
ABHD17A	2.75273e-18	9.23212e-14	0.402126
CMTM3	2.82982e-18	9.49066e-14	0.340946
PRKCH	3.38275e-18	1.13451e-13	0.370281
S1PR1	3.64626e-18	1.22288e-13	0.40411
SHISA5	6.42806e-18	2.15584e-13	0.390837
NFATC3	7.62876e-18	2.55853e-13	0.371532
ARRB2	1.01599e-17	3.40742e-13	0.299889
SH2D1A	1.52996e-17	5.13118e-13	0.368887
CRBN	1.6241e-17	5.44691e-13	0.317966
BATF	2.24343e-17	7.52401e-13	0.270671
VAMP2	2.31413e-17	7.76114e-13	0.408632
ARHGDIB	2.64195e-17	8.86057e-13	0.293916
GSTK1	2.77762e-17	9.31558e-13	0.419893
GNG2	2.84222e-17	9.53223e-13	0.377949
PPDPF	3.08348e-17	1.03414e-12	0.312727
IDH2	3.45943e-17	1.16022e-12	0.385108
IKZF1	3.71806e-17	1.24696e-12	0.355132
ADD3	5.90113e-17	1.97912e-12	0.333284
RNF213	6.33652e-17	2.12514e-12	0.434038
TBCB	7.60199e-17	2.54956e-12	0.382339
YWHAQ	8.63936e-17	2.89747e-12	0.376017
CYTOR	1.32185e-16	4.43321e-12	0.307302
RPL36AL	1.51991e-16	5.09749e-12	0.3106
RPL14	1.63013e-16	5.46714e-12	0.251901
RUNX3	2.85014e-16	9.5588e-12	0.380559
SLFN5	3.02612e-16	1.0149e-11	0.32451
CTDSP1	4.54861e-16	1.52551e-11	0.401423
C12orf57	5.23583e-16	1.75599e-11	0.379828
TUBA4A	6.67925e-16	2.24009e-11	0.40724
NCBP2-AS2	8.45835e-16	2.83676e-11	0.347269
MRPL10	1.04261e-15	3.4967e-11	0.345305
HMOX2	1.13253e-15	3.79829e-11	0.360297
RAB27A	1.20988e-15	4.0577e-11	0.303316
GPR65	1.50966e-15	5.06311e-11	0.336977
PSTPIP1	1.66309e-15	5.57767e-11	0.293378
ARHGEF3	1.81128e-15	6.07468e-11	0.37116
RALY	2.02889e-15	6.80449e-11	0.341978
CSK	2.05907e-15	6.90572e-11	0.394314
FAM49B	2.27686e-15	7.63615e-11	0.285154
LIMD2	4.72237e-15	1.58379e-10	0.348762
CAPZB	1.04118e-14	3.49191e-10	0.308781
CD53	1.08376e-14	3.6347e-10	0.317935
C9orf78	1.14188e-14	3.82962e-10	0.314019
WIPF1	1.25599e-14	4.21234e-10	0.345462
FMNL1	1.31734e-14	4.41809e-10	0.28166
ACTN4	1.33059e-14	4.46252e-10	0.324649
CASP1	1.91914e-14	6.43641e-10	0.271141
EEF1D	1.92392e-14	6.45244e-10	0.254842
ADAM8	2.13343e-14	7.15509e-10	0.299175
TES	2.42212e-14	8.12332e-10	0.317406
MBP	3.8598e-14	1.2945e-09	0.391264
CCNDBP1	6.07063e-14	2.03597e-09	0.272194
PRR13	6.14235e-14	2.06002e-09	0.265631
IKZF3	7.70125e-14	2.58284e-09	0.318796
PTPN6	8.99449e-14	3.01657e-09	0.29215
LINC00623	1.03852e-13	3.483e-09	0.342827
MSN	1.04323e-13	3.49877e-09	0.309366
ORAI1	1.28071e-13	4.29525e-09	0.370167
HSPA8	1.4527e-13	4.87208e-09	0.280719
BSG	1.51305e-13	5.07447e-09	0.305568
ATP2B4	1.77109e-13	5.93989e-09	0.36964
NDUFB10	1.80032e-13	6.03791e-09	0.298754
RNF167	1.86967e-13	6.27051e-09	0.351052
OSTF1	1.90867e-13	6.40131e-09	0.272088
CIB1	2.50879e-13	8.41397e-09	0.308895
CCDC85B	2.53561e-13	8.50392e-09	0.298994
2021-09-07	2.65303e-13	8.89774e-09	0.324369
APOL6	2.78582e-13	9.3431e-09	0.294656
ARHGEF1	2.83052e-13	9.49299e-09	0.307508
ITM2A	2.93745e-13	9.85163e-09	0.266749
RPL17	3.08394e-13	1.03429e-08	0.291189
SCAMP2	3.50049e-13	1.17399e-08	0.375945
TC2N	4.79907e-13	1.60951e-08	0.274886
SRPK2	7.79835e-13	2.61541e-08	0.332604
DEF6	8.76227e-13	2.93869e-08	0.269571
TPM3	9.45412e-13	3.17072e-08	0.283022
2021-09-01	1.27573e-12	4.27853e-08	0.317653
MRPS6	1.31551e-12	4.41194e-08	0.298165
WDR1	1.36257e-12	4.56979e-08	0.275548
HMGN4	1.47942e-12	4.96167e-08	0.348388
SUB1	1.60194e-12	5.37259e-08	0.309366
AAK1	1.77298e-12	5.94623e-08	0.317958
DIAPH1	1.84051e-12	6.1727e-08	0.334262
PCBP1	1.99367e-12	6.68637e-08	0.294015
SPSB3	2.01178e-12	6.74712e-08	0.329082
GOLGA7	2.19878e-12	7.37428e-08	0.270586
TOMM7	2.47916e-12	8.31462e-08	0.282053
CD47	2.90409e-12	9.73973e-08	0.347468
FKBP11	3.1031e-12	1.04072e-07	0.298057
MRFAP1L1	3.45203e-12	1.15774e-07	0.332468
RBL2	3.47222e-12	1.16451e-07	0.309919
SRP9	3.65383e-12	1.22542e-07	0.328235
KLRB1	4.29113e-12	1.43916e-07	0.503464
CYB561D2	4.59041e-12	1.53953e-07	0.354912
DENND2D	4.8606e-12	1.63015e-07	0.337946
NEDD8	5.67653e-12	1.90379e-07	0.276704
MZT2B	5.74535e-12	1.92688e-07	0.350587
STUB1	5.90956e-12	1.98195e-07	0.258738
DUSP2	8.12721e-12	2.72571e-07	0.2856
SCP2	9.2726e-12	3.10985e-07	0.283012
MAT2B	1.00971e-11	3.38635e-07	0.337694
CISD3	1.12136e-11	3.76082e-07	0.286767
GTF3A	1.17001e-11	3.92399e-07	0.338292
UBE2L6	1.52867e-11	5.12687e-07	0.285214
MEAF6	1.65658e-11	5.55583e-07	0.281878
CDC42EP3	1.83809e-11	6.16459e-07	0.256627
SSR2	2.72542e-11	9.14053e-07	0.286299
TRIR	5.41397e-11	1.81574e-06	0.298858
HERPUD2	5.47139e-11	1.835e-06	0.283321
ADGRE5	5.7326e-11	1.9226e-06	0.260179
PRDM1	6.01434e-11	2.01709e-06	0.340094
PIM1	6.64098e-11	2.22725e-06	0.282657
TBCC	6.74909e-11	2.26351e-06	0.268768
STK10	7.34155e-11	2.46221e-06	0.280197
NDUFB7	7.62502e-11	2.55728e-06	0.268379
RASA3	8.04687e-11	2.69876e-06	0.315385
MFSD10	8.49171e-11	2.84795e-06	0.310033
ACTR3	9.15422e-11	3.07014e-06	0.345105
SF3A2	1.11645e-10	3.74437e-06	0.300312
PDIA3	1.35965e-10	4.56e-06	0.278566
RPS10	1.5175e-10	5.0894e-06	0.326517
MAX	1.83078e-10	6.14007e-06	0.276464
DGUOK	1.92686e-10	6.4623e-06	0.255295
CASP8	1.98177e-10	6.64646e-06	0.303594
EMB	3.22965e-10	1.08316e-05	0.276883
MIEN1	7.03278e-10	2.35865e-05	0.273995
FLOT2	9.11246e-10	3.05614e-05	0.267573
PHF11	1.08179e-09	3.62812e-05	0.2792
DNAJB14	1.19972e-09	4.02363e-05	0.289385
RAB1B	1.33968e-09	4.49301e-05	0.285282
KCNAB2	1.39373e-09	4.67428e-05	0.251473
PGAM1	1.50499e-09	5.04743e-05	0.256406
NCKAP1L	1.72291e-09	5.77828e-05	0.260728
OPTN	2.59247e-09	8.69461e-05	0.291271
TADA3	2.83868e-09	9.52037e-05	0.254376
NUB1	3.08775e-09	0.000103557	0.263687
CYTH1	3.63332e-09	0.000121854	0.318295
TMEM160	3.90136e-09	0.000130844	0.256322
AKNA	4.1867e-09	0.000140413	0.258591
APRT	4.35002e-09	0.000145891	0.276742
FRG1	1.17806e-08	0.000395098	0.250631
PLEKHJ1	3.02755e-08	0.00101538	0.27588
LSM8	3.53872e-08	0.00118681	0.271447
DCTN2	5.86353e-08	0.00196651	0.255484
TNFRSF14	6.80956e-08	0.00228379	0.275334
TERF2IP	9.47015e-08	0.0031761	0.285594
HMGN3	9.62866e-08	0.00322926	0.272427
RBCK1	1.25419e-07	0.0042063	0.250568
DRAP1	1.52946e-07	0.0051295	0.275756
DERL1	2.75817e-07	0.00925036	0.308559
PYURF	2.99382e-07	0.0100407	0.260336
FNTA	3.15374e-07	0.010577	0.273146

## Sheet: 8
gene	p_val	p_val_adj	avg_logFC
C1QC	7.26498e-276	2.43653e-271	2.87681
C1QA	1.17576e-259	3.94326e-255	2.64059
C1QB	2.19034e-241	7.34596e-237	2.64436
APOC1	2.8705e-168	9.62708e-164	2.90571
APOE	3.22263e-119	1.08081e-114	3.03232
HLA-DRA	5.30689e-112	1.77982e-107	2.00058
HLA-DPB1	1.5311e-111	5.135e-107	2.1094
S100B	1.24962e-108	4.19098e-104	1.92374
CST3	7.75371e-102	2.60044e-97	2.08776
HLA-DPA1	1.31291e-92	4.40323e-88	2.01826
CD74	8.37841e-88	2.80995e-83	1.76295
HLA-DRB5	4.80077e-87	1.61008e-82	1.89341
TMSB4X	4.10235e-81	1.37585e-76	1.03219
HLA-DQA2	2.37036e-80	7.94972e-76	1.65853
IL18	2.22801e-73	7.47228e-69	1.35468
MS4A6A	3.42119e-71	1.1474e-66	1.67585
AIF1	1.39021e-70	4.66249e-66	1.23611
LGALS2	2.06796e-67	6.93552e-63	1.45526
TMSB10	1.19935e-64	4.02239e-60	0.863565
CD68	2.01858e-63	6.7699e-59	1.75273
LYZ	5.13009e-62	1.72053e-57	0.631784
SPI1	1.36285e-59	4.57072e-55	1.27029
ACTB	3.45276e-59	1.15799e-54	1.16006
TYROBP	4.14346e-54	1.38963e-49	0.993415
HLA-DQB1	7.05775e-53	2.36703e-48	1.62715
NPC2	8.23438e-52	2.76165e-47	1.7558
FTL	1.10441e-50	3.70397e-46	1.72856
GSN	1.5352e-50	5.14877e-46	1.3055
HLA-DRB1	2.16382e-47	7.25701e-43	1.54236
HLA-DMA	7.12906e-46	2.39094e-41	1.26923
CPVL	3.12779e-42	1.049e-37	1.63607
GRN	1.77736e-40	5.9609e-36	1.4284
GSTP1	1.21953e-38	4.09006e-34	1.28844
CAPG	6.51116e-35	2.18371e-30	1.60435
FCER1G	2.54158e-33	8.52396e-29	0.681016
S100A11	4.63476e-32	1.55441e-27	0.845542
PSAP	2.02958e-31	6.8068e-27	1.53869
HLA-DQA1	8.32365e-31	2.79159e-26	1.22692
PFN1	7.90201e-30	2.65017e-25	0.693745
PPIA	2.82146e-29	9.46261e-25	0.650519
SERPINF1	3.60283e-28	1.20832e-23	0.420137
CFL1	4.14418e-27	1.38988e-22	0.741531
COTL1	1.1305e-25	3.79148e-21	1.13448
CTSB	8.74497e-25	2.93289e-20	1.5163
ACTG1	1.09812e-24	3.68288e-20	0.570174
VAMP8	1.86504e-24	6.25499e-20	1.08545
TUBA1B	4.54825e-23	1.52539e-18	1.15996
ARPC3	1.00759e-22	3.37927e-18	0.701171
SERF2	1.1397e-22	3.82231e-18	0.535868
C1orf162	2.83906e-22	9.52163e-18	1.0159
LGALS9	2.90855e-21	9.75469e-17	0.961212
MS4A7	3.09984e-21	1.03962e-16	0.990409
ANXA5	2.21079e-19	7.41453e-15	0.884217
CTSC	2.3267e-19	7.80329e-15	1.33035
CTSH	3.57739e-19	1.19978e-14	1.1635
RAC1	5.66203e-19	1.89893e-14	0.880084
RNASE6	3.14479e-18	1.0547e-13	0.9861
CXCL16	4.49954e-18	1.50906e-13	0.942795
RGS10	1.82834e-17	6.13188e-13	1.01028
RHOA	1.97196e-16	6.61355e-12	0.629122
OAZ1	5.08549e-16	1.70557e-11	0.476248
SELENOP	8.81013e-16	2.95474e-11	2.01502
YWHAH	1.26984e-15	4.2588e-11	1.18089
FCGRT	7.59453e-15	2.54705e-10	1.06081
HLA-DMB	2.36277e-14	7.92427e-10	0.891843
TUBB	3.34351e-14	1.12134e-09	1.1004
GABARAP	4.70107e-14	1.57665e-09	0.533351
YBX1	2.19071e-13	7.34719e-09	0.599788
ALDH2	2.47002e-13	8.28396e-09	0.927706
LY86	2.97442e-13	9.97561e-09	0.760065
ATOX1	2.98976e-13	1.0027e-08	0.977769
NME2	3.11226e-13	1.04379e-08	0.802973
SAMHD1	1.23291e-12	4.13494e-08	1.00876
ARPC5	1.92778e-12	6.46537e-08	0.920472
LST1	2.99117e-12	1.00318e-07	0.484926
TYMP	5.31834e-12	1.78366e-07	0.763668
PPA1	5.92448e-12	1.98695e-07	1.10684
RAB31	9.51832e-12	3.19226e-07	0.696323
VIM	2.90817e-11	9.75342e-07	0.353159
FTH1	4.25162e-11	1.42591e-06	0.290308
GDI2	4.82842e-11	1.61936e-06	0.871844
FGL2	5.09627e-11	1.70919e-06	0.653582
MFSD1	6.8453e-11	2.29578e-06	0.904696
MYL6	3.36839e-10	1.12969e-05	0.349955
GAPDH	5.92832e-10	1.98824e-05	0.326518
LAP3	6.7028e-10	2.24798e-05	0.881745
SNX3	3.81522e-09	0.000127955	1.11696
LGALS1	1.67111e-08	0.000560458	0.74045
ATP5F1E	2.8348e-08	0.000950734	0.306121
LGALS3	4.08949e-08	0.00137153	1.06333
PLSCR1	4.75436e-08	0.00159452	0.758141
ZYX	9.63843e-08	0.00323254	0.777259
CTSS	1.20974e-07	0.00405721	0.455432
ARPC2	1.99038e-07	0.00667533	0.474238
H2AFY	2.01929e-07	0.00677231	0.724228
GPX4	2.60752e-07	0.00874511	0.720193
GLUL	2.88731e-07	0.00968345	1.05852
ENO1	3.18084e-07	0.0106679	0.714199
CAT	3.79996e-07	0.0127443	0.686551
ACTR3	8.47309e-07	0.0284171	0.770066
AKR1A1	1.30125e-06	0.0436414	0.879299
SLC25A5	1.62618e-06	0.054539	0.588953
NCOA4	2.0162e-06	0.0676192	0.879345
PYCARD	2.80279e-06	0.0939998	0.557018
AP2S1	3.03366e-06	0.101743	0.670639
PPT1	3.12962e-06	0.104961	0.804691
ANXA2	3.23297e-06	0.108427	0.693043
CYBB	5.54156e-06	0.185853	0.715596
LSP1	7.85224e-06	0.263348	0.895574
PTMS	9.27585e-06	0.311094	0.585909
LAMTOR2	1.04482e-05	0.350411	0.771125
HCLS1	1.42086e-05	0.476527	0.620247
CD63	1.45716e-05	0.488701	0.689717

## Sheet: 9
gene	p_val	p_val_adj	avg_logFC
PLBD1	0	0	2.00272
LRRK2	0	0	1.52145
AC020656.1	0	0	1.26832
FCN1	2.08385e-295	6.98882e-291	2.13331
CLEC4E	4.50632e-295	1.51133e-290	1.48474
CD163	1.07732e-287	3.61311e-283	1.58142
MEGF9	2.69991e-274	9.05496e-270	1.36029
CLEC12A	1.71313e-273	5.74551e-269	1.29622
S100A12	4.26081e-269	1.42899e-264	2.24435
VCAN	2.8789e-268	9.65527e-264	2.40877
CCR1	2.38845e-249	8.01037e-245	0.970587
RBP7	1.3534e-235	4.53904e-231	1.14195
MNDA	1.71321e-234	5.74576e-230	1.56287
CSTA	8.20491e-229	2.75176e-224	1.517
AL034397.3	4.88293e-213	1.63764e-208	0.760469
NCF2	2.47708e-208	8.30764e-204	1.22515
RGS18	7.1788e-206	2.40762e-201	0.712574
MPEG1	1.22204e-203	4.09847e-199	1.43752
AQP9	1.9729e-203	6.6167e-199	0.889865
SLC11A1	1.27225e-201	4.26687e-197	1.23612
FCGR1A	6.34626e-191	2.12841e-186	0.853972
CD36	4.73087e-182	1.58664e-177	1.23538
FPR1	1.80391e-178	6.04995e-174	1.21693
BST1	4.50016e-178	1.50926e-173	0.905511
S100A9	3.43469e-175	1.15193e-170	2.2062
S100A8	9.16918e-171	3.07516e-166	1.86935
C5AR1	2.37703e-170	7.97209e-166	1.20633
CLEC4D	2.48231e-169	8.32516e-165	0.542054
TNFSF13B	3.30309e-168	1.10779e-163	1.27406
TMEM170B	7.49078e-167	2.51226e-162	0.692558
MGST1	8.37169e-167	2.8077e-162	0.897132
LYZ	2.48558e-165	8.33614e-161	1.85988
IFI30	1.07202e-163	3.59533e-159	1.25441
DYSF	2.42878e-163	8.14564e-159	0.711205
IRAK3	5.51719e-163	1.85036e-158	1.11841
CDA	2.99725e-162	1.00522e-157	0.784093
CLEC7A	1.10859e-161	3.71797e-157	1.14177
KCTD12	4.70529e-160	1.57806e-155	1.35357
KCNE3	1.0197e-159	3.41988e-155	0.581837
CSF3R	2.97286e-159	9.97036e-155	0.911565
AC245128.3	3.11856e-156	1.0459e-151	0.770318
CYBB	4.23747e-156	1.42116e-151	1.50287
LILRA5	1.0552e-154	3.53894e-150	0.987592
FPR2	5.91105e-154	1.98245e-149	0.635047
NAIP	2.26186e-153	7.58583e-149	0.98494
LILRB2	3.7762e-153	1.26646e-148	1.07963
CD93	6.93307e-153	2.32521e-148	0.947249
DMXL2	5.07129e-152	1.70081e-147	1.03275
FCGR1B	5.83112e-151	1.95564e-146	0.639265
MCEMP1	1.09318e-150	3.6663e-146	0.841939
PSTPIP2	1.27696e-148	4.28266e-144	0.908577
AGFG1	1.30119e-148	4.36395e-144	1.11281
TLR2	6.27405e-146	2.10419e-141	0.934529
HBB	5.77918e-143	1.93822e-138	0.292667
MS4A6A	1.37122e-142	4.5988e-138	1.05709
TLR4	3.83949e-142	1.28769e-137	0.78154
CD68	6.24715e-141	2.09517e-136	1.05037
MAFB	6.10396e-140	2.04715e-135	1.42241
HLX	9.83776e-140	3.29939e-135	0.677828
FGR	2.83443e-139	9.50611e-135	1.19578
P2RY13	4.42894e-139	1.48538e-134	0.512054
C19orf38	3.41149e-138	1.14415e-133	0.825271
VNN2	7.32517e-138	2.45672e-133	0.826722
ITGAM	2.09245e-137	7.01766e-133	1.06664
NFE2	2.1732e-136	7.28849e-132	0.475212
2021-03-01	3.89467e-136	1.3062e-131	0.592065
LINC00937	1.71965e-135	5.76736e-131	0.589868
CD302	7.18229e-133	2.4088e-128	1.23818
TFEC	1.13058e-132	3.79175e-128	0.603884
SMIM25	2.32637e-132	7.80216e-128	0.772879
LILRB3	8.15652e-132	2.73553e-127	0.756489
FGL2	5.81661e-131	1.95078e-126	1.21257
CD14	1.36406e-130	4.57478e-126	1.08555
CYP1B1	7.3752e-129	2.4735e-124	0.981203
AIF1	2.46977e-127	8.2831e-123	1.2682
PLXDC2	5.49925e-127	1.84434e-122	0.870722
NFAM1	7.51639e-127	2.52085e-122	0.66172
GCA	2.76183e-122	9.26262e-118	1.03293
RAB31	3.10014e-121	1.03972e-116	1.1317
PTPRE	4.79112e-121	1.60685e-116	1.30282
SLC8A1	9.03801e-121	3.03117e-116	0.772367
HK3	2.49051e-120	8.35269e-116	0.599695
CFD	7.50648e-120	2.51752e-115	0.664878
LST1	1.13658e-119	3.81188e-115	0.965072
ATP2B1-AS1	1.94725e-119	6.5307e-115	1.41702
PGD	1.02505e-118	3.43782e-114	1.27996
FCER1G	8.11098e-117	2.72026e-112	1.23269
CTSS	8.08311e-115	2.71091e-110	1.73414
LILRA2	1.04743e-114	3.51287e-110	0.673845
NUDT16	5.80065e-114	1.94542e-109	0.907582
KLF4	1.67922e-113	5.63178e-109	1.15364
TYROBP	3.2265e-113	1.0821e-108	1.37212
STXBP2	5.2953e-113	1.77594e-108	1.40119
PADI4	4.98081e-112	1.67047e-107	0.505344
DUSP6	7.65642e-112	2.56781e-107	1.34045
LRRC25	9.36842e-112	3.14198e-107	0.664076
IGSF6	1.48956e-109	4.99568e-105	0.759225
TYMP	2.36711e-109	7.93882e-105	1.29716
JDP2	4.0464e-109	1.35708e-104	0.588928
NLRP3	3.63855e-108	1.2203e-103	0.926861
IL1R2	7.23946e-108	2.42797e-103	0.99797
LILRA6	1.11427e-107	3.73705e-103	0.490723
FGD4	8.12187e-107	2.72391e-102	0.820242
GAS7	2.84453e-105	9.53997e-101	0.792141
SLC7A7	1.37238e-103	4.60268e-99	0.83542
FCGR2A	3.06036e-103	1.02638e-98	0.816206
HCK	3.48394e-103	1.16844e-98	0.721173
SPTLC2	1.23161e-102	4.13057e-98	1.00477
JAML	1.40175e-102	4.70118e-98	0.943582
PHC2	1.37345e-101	4.60627e-97	0.763595
DOK3	1.50476e-101	5.04667e-97	0.594365
LTB4R	2.40437e-100	8.06377e-96	0.492746
QPCT	9.15683e-100	3.07102e-95	0.620875
NPL	1.29485e-99	4.34268e-95	0.592228
TREM1	3.99998e-99	1.34151e-94	0.78116
NAMPT	7.75148e-99	2.59969e-94	1.38229
SRGAP2	1.04666e-98	3.51028e-94	0.775891
CLEC4A	1.80866e-98	6.06587e-94	0.713024
AC005280.2	2.07006e-98	6.94255e-94	0.527576
SERPINA1	2.41073e-98	8.0851e-94	0.670223
C1orf162	4.59098e-98	1.53972e-93	1.23171
SPI1	1.50573e-97	5.0499e-93	0.906975
THBS1	3.49634e-96	1.1726e-91	1.08953
CFP	1.14317e-94	3.83398e-90	0.856779
LRP1	2.38146e-94	7.98695e-90	0.740808
ACSL1	3.42486e-94	1.14863e-89	0.991194
PRAM1	1.55271e-93	5.20749e-89	0.624333
RBM47	2.59036e-93	8.68754e-89	0.784082
TKT	3.34702e-92	1.12252e-87	1.32024
CR1	3.96717e-92	1.33051e-87	0.651633
PYGL	4.52787e-92	1.51856e-87	0.614717
APLP2	7.06893e-92	2.37078e-87	1.24608
SRGAP2B	9.13427e-92	3.06345e-87	0.595847
AGTRAP	2.78536e-91	9.34153e-87	0.936706
CD1D	1.01155e-88	3.39254e-84	0.58036
PILRA	2.93516e-88	9.84395e-84	0.679101
SLC25A37	4.26762e-88	1.43127e-83	0.806221
OTUD1	2.05491e-86	6.89176e-82	0.781984
FCAR	3.22522e-86	1.08167e-81	0.573444
IL17RA	1.9133e-85	6.41683e-81	0.807256
RASGRP4	2.38918e-85	8.01285e-81	0.432487
SAP30	1.26127e-83	4.23004e-79	0.640245
CKAP4	5.16786e-83	1.7332e-78	0.79296
PTAFR	6.0123e-83	2.0164e-78	0.63345
TRIB1	6.88021e-83	2.30749e-78	0.922969
HK2	3.08347e-81	1.03413e-76	0.529456
NEAT1	5.1668e-81	1.73284e-76	1.36811
RNF130	5.95227e-80	1.99627e-75	1.02092
NCF1	1.28642e-79	4.31439e-75	1.08748
TNFAIP2	2.04155e-79	6.84694e-75	0.642747
CD33	3.74172e-79	1.2549e-74	0.547343
RASSF2	7.61783e-79	2.55487e-74	0.83104
OSCAR	1.47187e-78	4.93637e-74	0.534404
HRH2	2.14804e-78	7.20411e-74	0.55132
NUP214	2.5077e-78	8.41031e-74	0.864847
TSPO	2.97062e-78	9.96287e-74	1.18066
BCL2A1	6.23954e-78	2.09262e-73	0.971636
EVI2B	9.58833e-78	3.21573e-73	1.00443
SMCO4	1.16397e-77	3.90373e-73	0.660347
BLVRB	5.52537e-77	1.8531e-72	0.805175
PLAUR	1.41923e-76	4.75982e-72	0.696224
NFIL3	1.76291e-76	5.91246e-72	0.7624
SRGAP2C	3.26505e-76	1.09503e-71	0.488725
RGS2	3.94174e-76	1.32198e-71	1.11194
SERPINB1	6.94801e-76	2.33022e-71	1.33629
DDX60L	2.76468e-75	9.27217e-71	0.72325
CXCL8	3.00606e-75	1.00817e-70	1.05064
PYCARD	3.71176e-75	1.24485e-70	0.871645
S100A6	3.93312e-75	1.31909e-70	1.20073
TALDO1	4.40371e-75	1.47692e-70	1.0019
CREB5	8.1295e-75	2.72647e-70	0.586015
S100A11	8.70802e-73	2.9205e-68	0.983118
LILRA1	1.15157e-72	3.86215e-68	0.537741
S100A4	1.45641e-72	4.88452e-68	1.19658
FOS	1.59006e-72	5.33274e-68	1.2103
IRS2	5.07994e-72	1.70371e-67	0.888847
LTA4H	5.84224e-72	1.95937e-67	1.16621
DPYD	5.84472e-72	1.9602e-67	0.903861
GRN	7.34967e-72	2.46493e-67	1.05536
CST3	2.48305e-71	8.32764e-67	0.851757
GLRX	5.85617e-71	1.96404e-66	0.891057
CPPED1	1.19606e-70	4.01135e-66	0.585502
RNASE2	1.50787e-70	5.0571e-66	0.403676
SLC31A2	1.60832e-70	5.394e-66	0.608366
TNFSF10	2.52317e-70	8.46221e-66	0.856068
AP1S2	5.38994e-70	1.80768e-65	0.976211
CD300E	1.30277e-69	4.36922e-65	0.693289
CTSD	2.03464e-69	6.82377e-65	0.898883
CARD16	1.5332e-68	5.14204e-64	0.903301
ABHD5	1.03234e-67	3.46227e-63	1.02124
CSGALNACT2	1.07463e-67	3.60408e-63	0.841922
FAM198B	2.7919e-67	9.36348e-63	0.601044
HNMT	3.19194e-67	1.07051e-62	0.609694
CCL3	5.68215e-67	1.90568e-62	1.16067
ARHGEF40	1.03711e-66	3.47826e-62	0.546305
VSIR	2.73283e-66	9.16538e-62	0.903338
FTL	3.05221e-66	1.02365e-61	0.924945
AC007032.1	2.76187e-65	9.26277e-61	0.414911
CRISPLD2	7.73335e-65	2.59361e-60	0.417782
SGK1	3.98069e-64	1.33504e-59	1.14631
COTL1	5.54537e-64	1.85981e-59	1.03235
STX11	1.57317e-63	5.2761e-59	0.84632
EMILIN2	9.00916e-63	3.02149e-58	0.645842
H3F3A	3.55562e-62	1.19248e-57	0.68703
MBD2	5.2342e-62	1.75545e-57	0.707029
ASPH	8.21746e-62	2.75597e-57	0.744139
2021-03-01	1.63039e-61	5.46801e-57	0.685199
GAPT	1.76462e-61	5.91817e-57	0.637227
BRI3	3.25707e-61	1.09236e-56	0.694002
RNF144B	5.56294e-61	1.8657e-56	0.739819
SH3BGRL3	3.39871e-59	1.13986e-54	0.819995
SYK	6.60638e-59	2.21565e-54	0.732016
JAK2	9.81217e-59	3.29081e-54	0.528757
IFNGR2	9.83236e-59	3.29758e-54	0.824594
GK	1.40249e-58	4.70368e-54	0.609345
CASP1	3.77273e-58	1.2653e-53	0.76589
NACC2	3.89504e-58	1.30632e-53	0.489744
RAB3D	4.84623e-58	1.62533e-53	0.398987
ARPC1B	5.00204e-58	1.67758e-53	0.880404
ZEB2	2.74238e-57	9.19739e-53	1.0261
AGTPBP1	3.59357e-57	1.20521e-52	0.685095
CEBPD	5.11687e-57	1.7161e-52	0.694147
SIRPA	1.00726e-56	3.37814e-52	0.539789
ASAH1	1.56949e-56	5.26376e-52	0.835747
RIPOR2	1.79458e-56	6.01865e-52	0.792977
HACD4	2.60619e-56	8.74065e-52	0.794778
OAZ1	3.67067e-56	1.23107e-51	0.777148
ZNF106	6.50388e-56	2.18127e-51	0.777904
CPVL	8.47629e-56	2.84278e-51	0.533496
GNG5	1.73033e-55	5.8032e-51	0.819216
SHTN1	2.05332e-55	6.88643e-51	0.520957
ZNF385A	2.27774e-55	7.63907e-51	0.580953
GABARAP	4.2218e-55	1.41591e-50	0.794484
MCTP1	6.82671e-55	2.28954e-50	0.480521
CCNY	9.20373e-55	3.08675e-50	0.65453
IL1B	1.27762e-54	4.28489e-50	0.513963
C4orf48	1.40187e-54	4.7016e-50	0.740639
BLOC1S1	1.97221e-54	6.6144e-50	0.884776
LGALS1	3.04212e-54	1.02026e-49	0.929756
EREG	5.98174e-54	2.00616e-49	0.85494
SAT1	9.58133e-54	3.21339e-49	0.886584
SOD2	1.00431e-53	3.36825e-49	0.73072
DUSP1	2.79963e-53	9.38939e-49	0.882756
UBE2R2	4.20784e-53	1.41123e-48	0.60122
CHST15	6.57691e-53	2.20576e-48	0.43101
FKBP5	1.10204e-52	3.69602e-48	0.949831
MT-ND4	4.32735e-52	1.45131e-47	0.724512
SNX10	5.07779e-52	1.70299e-47	0.64264
FES	6.79445e-52	2.27872e-47	0.514325
CCDC88A	9.81176e-52	3.29067e-47	0.619663
UPP1	1.523e-51	5.10783e-47	0.767959
PLEK	2.9514e-51	9.8984e-47	0.66537
KIAA0930	3.02631e-51	1.01496e-46	0.482055
SORT1	4.83409e-51	1.62126e-46	0.471225
FBXL5	6.07906e-51	2.0388e-46	0.785344
ACTB	2.7228e-50	9.13174e-46	0.601465
GLIPR2	2.99007e-50	1.00281e-45	0.672622
S100A10	5.62744e-50	1.88733e-45	0.845282
AZI2	6.49608e-50	2.17865e-45	0.818455
RHOQ	1.08766e-49	3.64778e-45	0.578869
ATP5F1E	2.99594e-49	1.00478e-44	0.629928
LGALS2	3.03783e-49	1.01883e-44	0.524348
TIMP2	1.11777e-48	3.74878e-44	0.513781
SCIMP	2.17995e-48	7.3111e-44	0.487422
PSAP	2.69369e-48	9.03411e-44	0.873017
GNAQ	2.87533e-48	9.64328e-44	0.59997
SKAP2	4.50334e-48	1.51033e-43	0.681807
LCP1	9.19707e-48	3.08451e-43	0.841759
GNS	9.53329e-48	3.19728e-43	0.604865
TBXAS1	2.65375e-47	8.90016e-43	0.617034
RAB20	5.11091e-47	1.7141e-42	0.594958
MOSPD2	6.46072e-47	2.1668e-42	0.456591
AP2S1	6.78882e-47	2.27684e-42	0.694609
TGFBI	8.73193e-47	2.92851e-42	0.491344
UBXN11	1.51416e-46	5.07818e-42	0.621831
UBE2D1	3.23559e-46	1.08515e-41	0.694382
ATP11A	3.3695e-46	1.13006e-41	0.517715
MID1IP1	3.41664e-46	1.14587e-41	0.557401
EHBP1L1	1.32764e-45	4.45266e-41	0.488967
FYB1	1.34974e-45	4.52676e-41	0.82382
STAT1	1.3622e-45	4.56856e-41	0.745353
CNIH4	1.6011e-45	5.36976e-41	0.663397
RASSF4	1.83979e-45	6.1703e-41	0.540602
E2F3	6.32217e-45	2.12033e-40	0.461643
VMP1	1.9004e-44	6.37355e-40	0.864309
ATP6V1B2	4.559e-44	1.529e-39	0.636273
BEST1	9.17306e-44	3.07646e-39	0.426934
TRAPPC5	9.30086e-44	3.11932e-39	0.651635
SNX27	1.39334e-43	4.67299e-39	0.53458
FAM120A	1.42199e-43	4.76908e-39	0.667848
SAMHD1	1.51467e-43	5.0799e-39	0.80438
MIS18BP1	2.36495e-43	7.93157e-39	0.820657
CARS2	2.5611e-43	8.58943e-39	0.482281
CKLF	4.06652e-43	1.36383e-38	0.635694
MXD1	8.63598e-43	2.89633e-38	0.565422
PLXNC1	1.45871e-42	4.89223e-38	0.499961
MAPK14	1.91151e-42	6.41084e-38	0.48785
ARPC5	5.34694e-42	1.79326e-37	0.719425
LYST	8.63087e-42	2.89462e-37	0.718941
RAC1	9.52105e-42	3.19317e-37	0.709412
CAST	9.89611e-42	3.31896e-37	0.784612
NPC2	1.4197e-41	4.76138e-37	0.623315
SGMS2	1.90499e-41	6.38894e-37	0.47914
ATP6V1A	2.35323e-41	7.89228e-37	0.508448
RIN3	2.95707e-41	9.91742e-37	0.581886
DICER1	4.71813e-41	1.58237e-36	0.630416
LGALS3	7.06136e-41	2.36824e-36	0.490392
MAP3K3	8.60935e-41	2.8874e-36	0.466922
TUT7	8.62725e-41	2.89341e-36	0.627079
VIM	3.01816e-40	1.01223e-35	0.675414
STAT2	3.40132e-40	1.14073e-35	0.516947
LY96	3.67928e-40	1.23396e-35	0.539717
ROCK1	6.166e-40	2.06795e-35	0.844133
HIPK3	1.10868e-39	3.71829e-35	0.572567
CEBPB	1.80742e-39	6.06173e-35	0.559812
HMGB2	1.87411e-39	6.28541e-35	0.836756
ARRB2	2.22647e-39	7.46712e-35	0.705048
SOCS3	4.99113e-39	1.67393e-34	0.668507
MFSD1	6.21455e-39	2.08423e-34	0.612118
CDC42EP3	8.91103e-39	2.98858e-34	0.711853
GBP2	1.32639e-38	4.44846e-34	0.723039
SERF2	1.44369e-38	4.84186e-34	0.525389
USP15	2.63648e-38	8.84224e-34	0.759794
ZFAND5	2.69421e-38	9.03585e-34	0.936505
ARPC3	7.04737e-38	2.36355e-33	0.624167
CTSB	2.21879e-37	7.44139e-33	0.52607
ENTPD1	4.27673e-37	1.43433e-32	0.491371
ARHGAP26	4.4684e-37	1.49861e-32	0.498645
SULT1A1	1.45668e-36	4.88543e-32	0.48827
ADA2	1.8414e-36	6.17567e-32	0.622565
CREG1	2.85566e-36	9.57732e-32	0.545299
H2AFY	4.9255e-36	1.65191e-31	0.67772
RXRA	6.78997e-36	2.27722e-31	0.421206
ITGB2	7.68078e-36	2.57598e-31	0.699062
TNFSF13	8.30683e-36	2.78594e-31	0.401325
IQGAP1	1.22625e-35	4.11261e-31	0.72202
SLC36A4	1.22655e-35	4.11359e-31	0.542444
SCPEP1	1.75899e-35	5.8993e-31	0.615775
ATP5MPL	3.57611e-35	1.19936e-30	0.663663
GLUL	3.59947e-35	1.20719e-30	0.67962
KYNU	5.10994e-35	1.71377e-30	0.446761
CAPG	5.85299e-35	1.96297e-30	0.482295
APOL6	5.93342e-35	1.98995e-30	0.545204
ITGAX	8.56272e-35	2.87176e-30	0.410693
TMEM167A	1.06543e-34	3.57323e-30	0.69646
TMBIM4	1.39069e-34	4.66408e-30	0.519158
POLE4	1.39951e-34	4.69366e-30	0.678932
DIAPH2	1.51396e-34	5.0775e-30	0.506746
DOCK5	1.94314e-34	6.51689e-30	0.426453
USP3	2.11372e-34	7.08899e-30	0.601098
MTPN	3.30144e-34	1.10724e-29	0.659434
AC020916.1	5.18973e-34	1.74053e-29	0.738615
LAT2	6.07241e-34	2.03656e-29	0.533514
FOSB	6.49652e-34	2.1788e-29	0.612475
KLF6	8.56404e-34	2.87221e-29	0.736434
PGLS	8.94505e-34	2.99999e-29	0.633591
XAF1	1.14443e-33	3.8382e-29	0.671785
STK17B	2.2758e-33	7.63257e-29	0.691221
SAMSN1	2.40399e-33	8.06251e-29	0.635743
FAR1	4.26966e-33	1.43196e-28	0.451032
MCL1	4.7049e-33	1.57793e-28	0.658267
MSRB1	4.84652e-33	1.62543e-28	0.301147
ALOX5	8.31161e-33	2.78755e-28	0.403262
ALDH2	1.42766e-32	4.78808e-28	0.549209
GNAI2	1.47564e-32	4.949e-28	0.641072
G0S2	1.59704e-32	5.35615e-28	0.33069
HSBP1	2.22501e-32	7.46222e-28	0.543325
BACH1	4.00959e-32	1.34474e-27	0.614725
THEMIS2	5.39606e-32	1.80973e-27	0.496574
PTEN	8.38209e-32	2.81119e-27	0.554141
RAB5IF	1.09323e-31	3.66649e-27	0.636633
GAPDH	1.25054e-31	4.19405e-27	0.522996
LIMS1	1.32815e-31	4.45436e-27	0.600888
HBEGF	1.466e-31	4.91668e-27	0.548434
ANXA5	1.49055e-31	4.999e-27	0.614432
FAM200B	1.54641e-31	5.18634e-27	0.526142
LYN	1.96451e-31	6.58857e-27	0.529108
QKI	2.36719e-31	7.93907e-27	0.560801
ELOB	2.50599e-31	8.40459e-27	0.529428
CRTAP	3.82074e-31	1.2814e-26	0.591817
PARP14	4.59408e-31	1.54076e-26	0.59643
ZNF281	5.305e-31	1.77919e-26	0.598302
ODF3B	6.06788e-31	2.03505e-26	0.487452
MTHFR	9.92197e-31	3.32763e-26	0.401252
SULF2	1.44978e-30	4.86227e-26	0.386551
ACSL4	1.50587e-30	5.05038e-26	0.407044
BNIP3L	1.58861e-30	5.3279e-26	0.610167
CTSZ	1.58973e-30	5.33165e-26	0.467135
SQOR	1.75201e-30	5.87589e-26	0.436682
TCIRG1	1.76601e-30	5.92284e-26	0.537544
TNFRSF1A	3.60799e-30	1.21005e-25	0.414444
ETS2	4.40838e-30	1.47848e-25	0.45078
GRINA	5.35075e-30	1.79453e-25	0.597683
PECAM1	5.3781e-30	1.80371e-25	0.324838
LACTB	5.68837e-30	1.90777e-25	0.429549
METTL7A	7.1226e-30	2.38878e-25	0.437925
NMI	8.06745e-30	2.70566e-25	0.416598
RHOG	9.84667e-30	3.30238e-25	0.52164
IFNGR1	1.50166e-29	5.03626e-25	0.574801
LSM6	1.86778e-29	6.26417e-25	0.681517
ADAM17	2.02962e-29	6.80693e-25	0.410655
ALDOA	3.24623e-29	1.08872e-24	0.611882
PLEC	4.33577e-29	1.45413e-24	0.540548
SERP1	4.45685e-29	1.49474e-24	0.57199
ANXA1	4.99196e-29	1.6742e-24	0.515801
FKBP1A	5.86905e-29	1.96836e-24	0.494647
RNF149	5.99357e-29	2.01012e-24	0.624166
MYO1F	6.20699e-29	2.0817e-24	0.485442
PIK3AP1	6.91032e-29	2.31758e-24	0.447113
PICALM	9.77668e-29	3.2789e-24	0.481467
IFITM3	9.93744e-29	3.33282e-24	0.327484
LILRB1	1.13489e-28	3.80618e-24	0.448958
NCF4	1.2416e-28	4.16408e-24	0.400631
NDUFB1	1.30296e-28	4.36987e-24	0.62638
JARID2	2.02778e-28	6.80078e-24	0.452384
TMPO	2.31513e-28	7.76449e-24	0.57557
PAK1	2.56716e-28	8.60974e-24	0.382949
SPG21	3.26252e-28	1.09419e-23	0.545393
VAMP5	4.15799e-28	1.39451e-23	0.627609
DYNLT1	5.01477e-28	1.68185e-23	0.595707
LGALS9	5.3025e-28	1.77835e-23	0.504523
MPP1	6.5911e-28	2.21052e-23	0.426925
RASSF3	6.85158e-28	2.29788e-23	0.409894
RNF13	8.79958e-28	2.9512e-23	0.596872
OGFRL1	1.32991e-27	4.46024e-23	0.42232
FCGRT	2.27643e-27	7.63469e-23	0.49891
RAB27A	3.07359e-27	1.03082e-22	0.524645
WARS	3.1467e-27	1.05534e-22	0.491198
NFKBIZ	3.839e-27	1.28753e-22	0.832883
FOXN2	4.83916e-27	1.62296e-22	0.518317
TPM3	5.01032e-27	1.68036e-22	0.531828
RILPL2	5.54108e-27	1.85837e-22	0.561226
RBKS	6.19577e-27	2.07794e-22	0.650106
PCNX1	6.61734e-27	2.21932e-22	0.526199
BCL6	6.94551e-27	2.32939e-22	0.493613
STAB1	7.34939e-27	2.46484e-22	0.380027
LEPROT	8.06004e-27	2.70318e-22	0.504709
AC007952.4	8.57677e-27	2.87648e-22	0.571929
FNDC3B	1.57701e-26	5.28897e-22	0.386921
SH3GLB1	2.10304e-26	7.05317e-22	0.481999
CAPNS1	2.69341e-26	9.03315e-22	0.555227
SELL	3.90186e-26	1.30861e-21	0.437613
CTSH	3.9909e-26	1.33847e-21	0.434037
ZDHHC7	4.49817e-26	1.5086e-21	0.372257
BICD2	5.19052e-26	1.7408e-21	0.391428
PRKAG2	6.73712e-26	2.25949e-21	0.412037
CPD	1.01007e-25	3.38757e-21	0.501945
NUMB	1.05871e-25	3.55069e-21	0.491356
NADK	1.06196e-25	3.56159e-21	0.374197
MX2	1.08405e-25	3.63568e-21	0.511003
MYD88	1.10016e-25	3.68973e-21	0.535323
AC015912.3	1.37471e-25	4.6105e-21	0.425671
METTL9	1.50947e-25	5.06245e-21	0.58377
SH3BP2	1.66048e-25	5.56893e-21	0.358613
FAM45A	1.93881e-25	6.50237e-21	0.418736
MTMR3	3.13977e-25	1.05302e-20	0.422021
EVI2A	3.72075e-25	1.24787e-20	0.507243
CNPY3	4.01701e-25	1.34722e-20	0.606619
CYB5R4	5.19019e-25	1.74069e-20	0.496647
AHR	9.90491e-25	3.32191e-20	0.483944
GRB2	1.00105e-24	3.35731e-20	0.575663
GLIPR1	1.00523e-24	3.37134e-20	0.54925
DDX21	1.03884e-24	3.48405e-20	0.546899
PLSCR1	1.1588e-24	3.88638e-20	0.502482
TSPAN14	1.20583e-24	4.0441e-20	0.507423
MSL3	1.33262e-24	4.46935e-20	0.500263
ANKRD28	1.46168e-24	4.90217e-20	0.541649
RGS19	1.8148e-24	6.08646e-20	0.414593
GSTO1	3.19818e-24	1.0726e-19	0.482509
PXK	3.99615e-24	1.34023e-19	0.438904
OTULINL	4.04192e-24	1.35558e-19	0.437646
DTX3L	4.22345e-24	1.41646e-19	0.313311
HIPK2	5.26365e-24	1.76532e-19	0.450835
MT-ND2	5.76288e-24	1.93276e-19	0.463183
SLC43A2	6.95962e-24	2.33412e-19	0.387452
LAMTOR4	7.00219e-24	2.3484e-19	0.377923
LTBR	8.54246e-24	2.86497e-19	0.4124
SDCBP	8.77767e-24	2.94386e-19	0.523188
VIM-AS1	1.08497e-23	3.63877e-19	0.464726
CHP1	1.13116e-23	3.79369e-19	0.417685
PREX1	1.4131e-23	4.73927e-19	0.485118
ASGR1	1.43498e-23	4.81264e-19	0.317272
GSTP1	1.44979e-23	4.86229e-19	0.504514
FTH1	2.14763e-23	7.20271e-19	0.256498
MGAT1	2.41811e-23	8.10986e-19	0.561602
CUX1	2.58021e-23	8.65352e-19	0.506276
GRK3	2.76753e-23	9.28175e-19	0.377994
GBP1	3.34631e-23	1.12229e-18	0.439022
QSOX1	3.42095e-23	1.14732e-18	0.309227
PARP9	3.44512e-23	1.15542e-18	0.37484
ATG3	4.02678e-23	1.3505e-18	0.456019
STMP1	4.18195e-23	1.40254e-18	0.493246
ANXA2	4.8423e-23	1.62401e-18	0.391461
LCP2	6.73569e-23	2.25902e-18	0.47385
LY86	7.68299e-23	2.57672e-18	0.368668
RALB	1.00722e-22	3.37803e-18	0.330588
TMSB10	1.1849e-22	3.9739e-18	0.339678
MAP4K4	1.21419e-22	4.07216e-18	0.483905
TRIP12	1.39205e-22	4.66866e-18	0.491818
GRK2	1.45148e-22	4.86799e-18	0.383824
ATP6V0B	1.55054e-22	5.2002e-18	0.450639
CCPG1	1.87304e-22	6.28181e-18	0.429885
TMEM154	1.88766e-22	6.33083e-18	0.375902
UBE2F	2.26268e-22	7.58858e-18	0.367311
GAA	2.29092e-22	7.68327e-18	0.368669
SRGN	2.41498e-22	8.09936e-18	0.382993
RNASEK	2.52551e-22	8.47006e-18	0.487348
SH3KBP1	2.95133e-22	9.89818e-18	0.465316
NPTN	3.07652e-22	1.0318e-17	0.405305
ARPC2	3.10105e-22	1.04003e-17	0.399223
DOCK8	3.53741e-22	1.18638e-17	0.481685
PRELID1	3.66035e-22	1.22761e-17	0.482686
ZDHHC20	3.75573e-22	1.2596e-17	0.471509
ASAP1	4.84645e-22	1.6254e-17	0.390878
RNPEPL1	5.15923e-22	1.7303e-17	0.412408
RHOA	5.44254e-22	1.82532e-17	0.457226
SSFA2	5.86457e-22	1.96686e-17	0.398339
MT-CO1	6.65213e-22	2.23099e-17	0.35649
PSTPIP1	6.73722e-22	2.25953e-17	0.480788
RUNX1	7.54293e-22	2.52975e-17	0.507391
GIMAP2	8.64927e-22	2.90079e-17	0.338562
UBR4	8.87994e-22	2.97815e-17	0.533357
RTN3	9.55301e-22	3.20389e-17	0.491946
EP300	1.11396e-21	3.73599e-17	0.487842
CAT	1.37961e-21	4.62695e-17	0.430129
HSD17B11	1.70013e-21	5.70189e-17	0.583787
ABRACL	2.04367e-21	6.85408e-17	0.552716
ATP6V0E1	2.6132e-21	8.76416e-17	0.438953
SLA	2.95679e-21	9.91649e-17	0.514506
SHKBP1	3.14841e-21	1.05592e-16	0.44419
MDM2	3.37689e-21	1.13254e-16	0.440604
CCDC69	3.40194e-21	1.14094e-16	0.465711
PTPN12	3.5969e-21	1.20633e-16	0.379368
PTGER2	4.23039e-21	1.41879e-16	0.484503
PTPN6	4.23308e-21	1.41969e-16	0.323524
HEBP1	4.26401e-21	1.43006e-16	0.442772
GIMAP1	4.73796e-21	1.58902e-16	0.410042
NBPF19	6.17061e-21	2.0695e-16	0.443549
ATP5PO	6.85232e-21	2.29813e-16	0.396079
EAF1	8.46682e-21	2.8396e-16	0.45057
BASP1	8.77054e-21	2.94146e-16	0.385952
TOM1	8.94925e-21	3.0014e-16	0.42106
CYBA	1.16043e-20	3.89184e-16	0.440416
ATG16L2	1.7146e-20	5.75042e-16	0.407442
GMFG	1.76788e-20	5.92913e-16	0.422448
ALOX5AP	2.22136e-20	7.45e-16	0.307843
TPP1	2.2241e-20	7.4592e-16	0.514993
MAPKAPK3	2.79759e-20	9.38256e-16	0.363252
AKAP13	2.90085e-20	9.72887e-16	0.493449
IGF2R	3.30563e-20	1.10864e-15	0.360041
MICU1	3.87694e-20	1.30025e-15	0.371599
COL4A3BP	4.53276e-20	1.5202e-15	0.428029
ATP6V0D1	5.0502e-20	1.69374e-15	0.409496
RNASE6	5.55543e-20	1.86318e-15	0.363703
CLIC1	6.2912e-20	2.10994e-15	0.41147
CAP1	6.74229e-20	2.26123e-15	0.397136
TLN1	6.91776e-20	2.32008e-15	0.479397
SMAP2	8.64424e-20	2.89911e-15	0.443493
TRMT1	8.65944e-20	2.9042e-15	0.444625
ATF3	8.8704e-20	2.97495e-15	0.315887
ANPEP	9.7225e-20	3.26073e-15	0.349699
PIK3R5	1.20276e-19	4.03383e-15	0.316996
MBOAT7	1.22788e-19	4.11806e-15	0.278202
DAPP1	1.46332e-19	4.9077e-15	0.392475
BX284668.5	2.36115e-19	7.91882e-15	0.306779
WDR26	2.68415e-19	9.00209e-15	0.427983
VAPA	4.43862e-19	1.48863e-14	0.467072
MYO5A	4.86765e-19	1.63251e-14	0.258369
NBPF14	4.88404e-19	1.63801e-14	0.475617
FERMT3	7.68403e-19	2.57707e-14	0.46942
NABP1	7.99713e-19	2.68208e-14	0.302414
PPT1	1.32966e-18	4.45942e-14	0.380979
GIMAP4	1.44143e-18	4.83427e-14	0.36518
CTSA	1.61786e-18	5.42597e-14	0.453533
AHNAK	1.61922e-18	5.43053e-14	0.569053
PER1	1.76972e-18	5.93528e-14	0.489035
ARID1A	1.9606e-18	6.57547e-14	0.357407
MOB3A	2.30502e-18	7.73059e-14	0.440186
CFLAR	2.53297e-18	8.49506e-14	0.430393
SEC11A	2.5704e-18	8.6206e-14	0.491556
ZYX	3.18646e-18	1.06867e-13	0.440763
CNTRL	3.35178e-18	1.12412e-13	0.445245
ZBTB16	4.24463e-18	1.42357e-13	0.4192
ARPC4	4.84819e-18	1.62599e-13	0.392896
NBPF26	5.11161e-18	1.71433e-13	0.315181
PAG1	5.12655e-18	1.71934e-13	0.451585
AKIRIN2	5.82419e-18	1.95332e-13	0.594049
LAMTOR1	7.11524e-18	2.38631e-13	0.488361
NAPRT	7.51821e-18	2.52146e-13	0.333407
MIIP	8.75961e-18	2.9378e-13	0.337123
WAS	1.00269e-17	3.36283e-13	0.391807
ACTR2	1.14486e-17	3.83962e-13	0.445724
PRKCD	2.0365e-17	6.83e-13	0.429063
CCNL1	2.24743e-17	7.53743e-13	0.474845
TET2	2.49349e-17	8.36268e-13	0.464424
ACAP2	2.51195e-17	8.42458e-13	0.505014
CAPZA2	2.61605e-17	8.77372e-13	0.38255
POMP	3.42177e-17	1.14759e-12	0.436617
PLIN2	3.51342e-17	1.17833e-12	0.468996
MYL6	4.04021e-17	1.35501e-12	0.304982
CMIP	4.55508e-17	1.52768e-12	0.361993
BLVRA	4.75918e-17	1.59614e-12	0.362646
VPS35	5.25282e-17	1.76169e-12	0.439306
NOTCH2	5.50863e-17	1.84748e-12	0.333251
HNRNPU	6.09617e-17	2.04453e-12	0.498295
EIF4EBP2	6.44231e-17	2.16062e-12	0.430324
STX10	6.61718e-17	2.21927e-12	0.353826
TAOK3	6.84112e-17	2.29438e-12	0.40285
DPH3	9.20588e-17	3.08747e-12	0.419101
TAOK1	1.02812e-16	3.44811e-12	0.391052
ABHD2	1.23773e-16	4.1511e-12	0.30049
BNIP2	1.45857e-16	4.89174e-12	0.425737
PHACTR1	1.594e-16	5.34596e-12	0.356597
SNX6	1.61775e-16	5.42561e-12	0.353484
VCL	1.63787e-16	5.49309e-12	0.426384
IRF1	2.20542e-16	7.39653e-12	0.514679
IVNS1ABP	2.42379e-16	8.12891e-12	0.525527
MAP3K1	2.44646e-16	8.20493e-12	0.359484
HOOK3	2.4595e-16	8.24868e-12	0.403056
CDC42	2.85996e-16	9.59172e-12	0.390366
ADAM10	3.21848e-16	1.07941e-11	0.407974
ARHGAP24	4.21764e-16	1.41451e-11	0.25464
SETX	4.27457e-16	1.4336e-11	0.401536
GPCPD1	4.49877e-16	1.5088e-11	0.372643
CXCL2	4.65821e-16	1.56227e-11	0.370585
MRPL23	5.21188e-16	1.74796e-11	0.403419
G6PD	5.44989e-16	1.82778e-11	0.33465
BAZ1A	6.38906e-16	2.14276e-11	0.497219
PTTG1IP	6.4197e-16	2.15304e-11	0.299719
POU2F2	6.57937e-16	2.20659e-11	0.369776
TMEM33	9.50678e-16	3.18838e-11	0.281543
HEBP2	1.02696e-15	3.44423e-11	0.394495
NDUFC2	1.04068e-15	3.49022e-11	0.315064
RIPK2	1.07857e-15	3.61731e-11	0.345778
PIK3CD	1.19597e-15	4.01105e-11	0.325607
BLOC1S6	1.27163e-15	4.26481e-11	0.468326
NBPF10	1.35504e-15	4.54453e-11	0.395671
FOXO3	1.44724e-15	4.85374e-11	0.371474
KMT2C	1.58922e-15	5.32992e-11	0.444826
SHOC2	1.87211e-15	6.27867e-11	0.500027
ADGRE2	1.95442e-15	6.55475e-11	0.271556
MOB1A	2.07081e-15	6.94508e-11	0.504821
NOP10	2.09718e-15	7.03351e-11	0.365776
PPP1R15B	2.3872e-15	8.00618e-11	0.478061
PRR13	2.60716e-15	8.74389e-11	0.425808
IL6R	2.63097e-15	8.82375e-11	0.32514
EPSTI1	3.21388e-15	1.07787e-10	0.431006
CSNK2B	3.45172e-15	1.15764e-10	0.339722
MT-ND1	3.63917e-15	1.2205e-10	0.31109
RRP12	3.94348e-15	1.32256e-10	0.380011
FAM49B	4.92904e-15	1.6531e-10	0.33048
STK38	4.99909e-15	1.67659e-10	0.335666
GNB1	5.01437e-15	1.68172e-10	0.374821
ACTR3	5.80608e-15	1.94724e-10	0.38393
CAB39	6.12076e-15	2.05278e-10	0.306783
VMA21	6.64247e-15	2.22775e-10	0.333336
CELF2	8.23128e-15	2.76061e-10	0.380352
ARL8B	8.44635e-15	2.83274e-10	0.348708
SH3BGRL	1.24471e-14	4.17451e-10	0.409705
GSAP	1.32579e-14	4.44643e-10	0.282794
ANO6	1.4474e-14	4.85429e-10	0.335975
NCOA4	1.59095e-14	5.33573e-10	0.265245
ARL4A	1.98153e-14	6.64567e-10	0.475935
MIR4435-2HG	2.55572e-14	8.57137e-10	0.28234
PKM	2.68161e-14	8.99358e-10	0.286103
ATP5ME	3.04699e-14	1.0219e-09	0.420591
MLX	3.04926e-14	1.02266e-09	0.335459
NLRC5	3.21189e-14	1.0772e-09	0.284224
ME2	3.40813e-14	1.14302e-09	0.303122
GDI2	3.97514e-14	1.33318e-09	0.395619
BRK1	4.62809e-14	1.55217e-09	0.32823
GNB2	4.70535e-14	1.57808e-09	0.330377
C16orf72	4.83988e-14	1.6232e-09	0.408069
HCLS1	5.74231e-14	1.92585e-09	0.403742
COA6	6.78229e-14	2.27464e-09	0.283749
TXNDC17	7.11453e-14	2.38607e-09	0.336881
RAB24	7.42338e-14	2.48965e-09	0.330588
RPS4Y1	9.04269e-14	3.03274e-09	0.289251
VASP	9.39738e-14	3.15169e-09	0.308431
TGOLN2	9.98674e-14	3.34935e-09	0.383558
VAMP8	1.058e-13	3.54834e-09	0.375432
ZNF524	1.16003e-13	3.89052e-09	0.303632
CLIP1	1.51404e-13	5.07778e-09	0.385405
EFHD2	1.76012e-13	5.90308e-09	0.352547
ATOX1	2.12166e-13	7.11563e-09	0.294023
OSBPL8	2.24335e-13	7.52374e-09	0.437947
FAM111A	2.4285e-13	8.1447e-09	0.287056
PTP4A2	2.65135e-13	8.89211e-09	0.483919
DOCK11	2.69325e-13	9.03264e-09	0.31831
SLC6A6	3.06787e-13	1.0289e-08	0.311145
NIN	3.36282e-13	1.12782e-08	0.343813
OSTF1	3.66862e-13	1.23038e-08	0.322123
PSMB8	3.87554e-13	1.29978e-08	0.329532
ITGAE	5.73678e-13	1.924e-08	0.340712
SNX3	6.28791e-13	2.10884e-08	0.304411
GYG1	6.65265e-13	2.23116e-08	0.359625
MEF2A	6.67089e-13	2.23728e-08	0.368764
CMTM6	7.12374e-13	2.38916e-08	0.360931
C4orf3	7.42552e-13	2.49037e-08	0.316087
RTN4	8.02677e-13	2.69202e-08	0.362775
PCBP1	8.03504e-13	2.69479e-08	0.363955
COX17	8.34644e-13	2.79923e-08	0.347575
FMNL1	9.66898e-13	3.24278e-08	0.317739
FAM96A	1.06234e-12	3.56288e-08	0.319731
FLNA	1.06301e-12	3.56512e-08	0.303496
ATP5MC2	1.14121e-12	3.82738e-08	0.280444
PPP1R18	1.29567e-12	4.34542e-08	0.270286
AREG	1.3268e-12	4.44983e-08	0.537453
HK1	1.39234e-12	4.66962e-08	0.306369
UQCR11	1.51539e-12	5.0823e-08	0.354434
UBE2L6	1.65105e-12	5.5373e-08	0.354979
PAK2	1.66946e-12	5.59902e-08	0.306343
SLC16A3	1.69183e-12	5.67404e-08	0.31698
YWHAB	1.75303e-12	5.8793e-08	0.307306
MANBA	1.76482e-12	5.91884e-08	0.299159
LBR	1.87487e-12	6.28795e-08	0.328556
PGAM1	2.63391e-12	8.83361e-08	0.444608
PSMA4	2.72292e-12	9.13212e-08	0.396025
MED13L	3.08751e-12	1.03549e-07	0.253785
SCNM1	3.27908e-12	1.09974e-07	0.278517
WSB1	3.34554e-12	1.12203e-07	0.330592
RNF213	3.39417e-12	1.13834e-07	0.401523
BAZ2B	3.94086e-12	1.32168e-07	0.297875
IL13RA1	4.72186e-12	1.58362e-07	0.264544
WASHC2C	4.73965e-12	1.58958e-07	0.292552
RBMS1	5.14044e-12	1.724e-07	0.370664
ATP13A3	5.53825e-12	1.85742e-07	0.308805
ADAR	6.17608e-12	2.07133e-07	0.314559
PSMB9	7.20432e-12	2.41618e-07	0.291429
LAMP2	8.43887e-12	2.83023e-07	0.302815
DDX17	1.13174e-11	3.79561e-07	0.331734
CELF1	1.14286e-11	3.83293e-07	0.340964
PRKCB	1.33162e-11	4.46597e-07	0.28166
TBC1D1	1.41703e-11	4.75245e-07	0.289561
IFI16	1.71238e-11	5.74299e-07	0.349576
MSN	1.74095e-11	5.83879e-07	0.284919
COX6B1	2.14968e-11	7.2096e-07	0.309427
FEZ2	2.45967e-11	8.24926e-07	0.261753
PSMA1	2.60319e-11	8.73058e-07	0.304539
PELI1	2.62061e-11	8.78901e-07	0.382217
NRDC	3.10661e-11	1.04189e-06	0.403469
MAP3K2	3.12746e-11	1.04889e-06	0.415748
GNG10	3.76545e-11	1.26286e-06	0.269967
STAT6	4.03512e-11	1.3533e-06	0.274086
DEK	4.05609e-11	1.36033e-06	0.400061
TLE4	4.47078e-11	1.49941e-06	0.383437
PRDX3	5.22129e-11	1.75112e-06	0.336917
EIF3M	5.30009e-11	1.77754e-06	0.362727
IER2	5.90024e-11	1.97882e-06	0.380742
ATP6V0C	6.24032e-11	2.09288e-06	0.359129
XRN2	6.44151e-11	2.16036e-06	0.331623
BOD1L1	7.28131e-11	2.44201e-06	0.299605
ITPR2	9.27981e-11	3.11226e-06	0.255094
AFTPH	1.14658e-10	3.84539e-06	0.26312
PARVG	1.21832e-10	4.08599e-06	0.252076
JMJD1C	1.28151e-10	4.29793e-06	0.360474
C8orf59	1.3857e-10	4.64738e-06	0.350766
CTDSP1	1.63403e-10	5.4802e-06	0.339325
USP7	1.63917e-10	5.49743e-06	0.250026
SLC38A2	2.09003e-10	7.00954e-06	0.341907
NDUFA11	2.17468e-10	7.29345e-06	0.401086
SSH2	2.20108e-10	7.38198e-06	0.331133
MEF2C	2.25795e-10	7.5727e-06	0.279251
TNFRSF1B	2.35487e-10	7.89776e-06	0.308737
RAB8B	2.64527e-10	8.87169e-06	0.304593
CLTA	2.66351e-10	8.93287e-06	0.300471
SFT2D1	2.82562e-10	9.47656e-06	0.287222
DOK2	2.89595e-10	9.71244e-06	0.28107
OGFR	2.92131e-10	9.79747e-06	0.276247
DOCK2	3.02237e-10	1.01364e-05	0.301565
PSMB10	4.16091e-10	1.39549e-05	0.350077
STX7	4.20185e-10	1.40922e-05	0.346805
RAB10	4.44087e-10	1.48938e-05	0.286246
ACSL3	4.69117e-10	1.57333e-05	0.314326
CASP4	5.87346e-10	1.96984e-05	0.306962
MAP1LC3B	5.97347e-10	2.00338e-05	0.376473
LRRFIP2	6.45601e-10	2.16522e-05	0.271576
CSNK1A1	6.66765e-10	2.2362e-05	0.341033
MTRNR2L12	6.99441e-10	2.34579e-05	0.26564
CDC42SE1	7.1982e-10	2.41413e-05	0.279144
APBB1IP	8.23986e-10	2.76348e-05	0.258821
WASHC4	8.41551e-10	2.82239e-05	0.303281
RAB11FIP1	9.31081e-10	3.12266e-05	0.341792
MYO9B	9.75692e-10	3.27227e-05	0.317717
TRIM22	1.03869e-09	3.48354e-05	0.27677
TM9SF2	1.13047e-09	3.79136e-05	0.323686
FLII	1.20102e-09	4.02799e-05	0.251334
PJA2	1.50495e-09	5.04731e-05	0.279636
CBX3	1.54557e-09	5.18354e-05	0.258909
MRPL33	1.55365e-09	5.21062e-05	0.258003
PHF20L1	1.64041e-09	5.5016e-05	0.280227
JUND	1.64342e-09	5.51171e-05	0.355148
TIMM8B	1.73007e-09	5.80229e-05	0.301437
TMEM219	1.84265e-09	6.1799e-05	0.353967
PET100	2.0163e-09	6.76227e-05	0.289021
NDUFB9	2.31653e-09	7.76917e-05	0.27744
OXSR1	2.76936e-09	9.28787e-05	0.289488
NFKBIA	3.06178e-09	0.000102686	0.344777
MTIF3	3.15753e-09	0.000105897	0.300718
RAP1A	3.32581e-09	0.000111541	0.310002
CD44	3.37105e-09	0.000113058	0.269067
YY1	3.84451e-09	0.000128937	0.26982
HECA	4.38156e-09	0.000146949	0.292707
PLEKHB2	4.78244e-09	0.000160393	0.273622
PRKAR1A	5.24083e-09	0.000175767	0.350957
GLTP	5.41803e-09	0.00018171	0.31371
NDUFB5	5.7633e-09	0.00019329	0.302149
EIF2S2	6.42605e-09	0.000215517	0.299588
ATP5MF	6.85238e-09	0.000229815	0.252579
PHF11	6.87813e-09	0.000230679	0.263775
LPGAT1	7.115e-09	0.000238623	0.268697
EIF3A	8.17925e-09	0.000274316	0.325025
ENO1	1.04337e-08	0.000349926	0.260478
TNFAIP3	1.15683e-08	0.000387976	0.266067
TBCA	1.22351e-08	0.000410342	0.270473
TRAPPC1	1.33767e-08	0.000448628	0.302337
EIF4E2	2.01017e-08	0.000674171	0.26028
CLTC	2.02304e-08	0.000678487	0.252472
HIPK1	2.06437e-08	0.000692347	0.339645
RB1	2.20513e-08	0.000739555	0.263662
MINOS1	2.21062e-08	0.000741399	0.313564
ADIPOR1	2.39682e-08	0.000803847	0.303969
SP110	2.94336e-08	0.000987145	0.32771
LYPLA1	3.23633e-08	0.0010854	0.25573
ATP5PB	3.32361e-08	0.00111467	0.278099
WASF2	4.23465e-08	0.00142022	0.253212
NDUFB3	4.83081e-08	0.00162016	0.257408
ATP6V1G1	5.62211e-08	0.00188554	0.25563
NDUFA3	5.89977e-08	0.00197867	0.299068
FAM208A	6.30439e-08	0.00211437	0.268206
ERICH1	7.23925e-08	0.0024279	0.261712
CTNNA1	8.2919e-08	0.00278094	0.261725
UBE2J1	8.46872e-08	0.00284024	0.267499
MRPL52	8.68409e-08	0.00291247	0.286924
DYNLL1	9.87365e-08	0.00331143	0.266682
WAC	1.0899e-07	0.0036553	0.280422
RNF7	1.09679e-07	0.00367842	0.276657
ATP6V1E1	1.41048e-07	0.00473045	0.254845
NUFIP2	1.41801e-07	0.00475571	0.272665
THOC7	2.05643e-07	0.00689687	0.290332
TRA2B	2.05737e-07	0.00690002	0.285918
ZNF706	3.45163e-07	0.0115761	0.257833
LAP3	4.55013e-07	0.0152602	0.310891
RB1CC1	5.20407e-07	0.0174534	0.250045
MX1	7.195e-07	0.0241306	0.313373
DNAJC15	9.0758e-07	0.0304384	0.275283
SH3BP5	1.16195e-06	0.0389696	0.254488
PBRM1	1.44305e-06	0.048397	0.262644
GSK3B	1.47983e-06	0.0496306	0.27666

## Sheet: 10
gene	p_val	p_val_adj	avg_logFC
LINC02446	0	0	1.82726
CD8B	2.45508e-292	8.23384e-288	1.7875
CD8A	6.80325e-160	2.28167e-155	1.02987
LEF1	1.35301e-135	4.53773e-131	1.2417
NELL2	3.80287e-135	1.27541e-130	0.956161
MAL	2.70248e-107	9.06356e-103	0.771367
TCF7	6.16465e-104	2.0675e-99	1.14153
RPS12	7.91069e-82	2.65309e-77	0.845332
FLT3LG	1.28126e-76	4.29707e-72	0.885719
NOSIP	6.27567e-74	2.10473e-69	1.04904
RPS3A	9.60955e-74	3.22285e-69	0.783015
RPS14	2.73321e-73	9.16664e-69	0.715763
RPS21	2.95362e-71	9.90586e-67	0.773576
RPL34	1.2869e-69	4.31599e-65	0.66756
LDLRAP1	2.13508e-69	7.16063e-65	0.702714
RPL32	3.15547e-69	1.05828e-64	0.713123
EEF1A1	5.02832e-67	1.6864e-62	0.628064
RPL19	7.51331e-67	2.51981e-62	0.626421
RPL30	1.82607e-66	6.12428e-62	0.610338
RPS4X	5.27396e-66	1.76878e-61	0.739003
RPS15A	6.75484e-66	2.26544e-61	0.616357
RPL10	8.53558e-66	2.86266e-61	0.654516
RPS28	1.20285e-65	4.03413e-61	0.608946
RPL14	5.52795e-65	1.85396e-60	0.68846
RPS3	8.17189e-65	2.74069e-60	0.653077
RPL35A	8.17426e-64	2.74148e-59	0.606207
TRABD2A	1.70877e-63	5.73086e-59	0.559933
RPL37	2.04028e-63	6.8427e-59	0.630942
RPL13	2.40005e-62	8.04927e-58	0.630732
PCED1B	2.89097e-61	9.69572e-57	0.69788
RPS27A	5.85086e-61	1.96226e-56	0.570427
CD3E	8.29381e-61	2.78158e-56	0.935525
OXNAD1	5.56254e-60	1.86556e-55	0.770119
RPS23	2.3496e-58	7.88009e-54	0.573799
CD27	2.38542e-58	8.00022e-54	0.744032
LDHB	7.1961e-58	2.41343e-53	0.960557
RPL18	3.32423e-57	1.11488e-52	0.584386
CCR7	2.05336e-56	6.88655e-52	0.811164
RPS25	6.80842e-56	2.28341e-51	0.638732
EEF1B2	2.03122e-55	6.81229e-51	0.785026
RPS27	1.81098e-54	6.07367e-50	0.651519
RPL22	4.7641e-54	1.59778e-49	0.666078
RPS5	5.09692e-54	1.7094e-49	0.713774
RPL5	5.66622e-54	1.90034e-49	0.62122
CD7	1.84587e-52	6.19067e-48	0.703882
CD3D	2.86325e-52	9.60276e-48	0.719867
RPS6	7.95714e-52	2.66866e-47	0.661177
RPS15	1.14857e-51	3.85209e-47	0.508594
RPS29	1.63904e-51	5.497e-47	0.764183
RPS8	1.95283e-50	6.5494e-46	0.549691
ARMH1	3.97112e-50	1.33183e-45	0.525661
RPS13	4.40924e-50	1.47877e-45	0.546484
EEF1G	7.78215e-50	2.60998e-45	0.823977
RPL29	1.31832e-47	4.42137e-43	0.515524
LCK	1.4384e-47	4.82412e-43	0.707864
RPL28	2.20316e-47	7.38896e-43	0.448377
RPL36	2.79966e-47	9.38949e-43	0.537154
RPS18	4.66481e-47	1.56449e-42	0.615632
GIMAP4	8.40044e-47	2.81734e-42	0.671733
RPLP1	1.86593e-46	6.25797e-42	0.505018
CARS	2.96283e-46	9.93673e-42	0.628479
RPL26	6.21154e-46	2.08323e-41	0.549426
RPL39	4.07607e-45	1.36703e-40	0.476959
RPL9	6.19568e-44	2.07791e-39	0.527546
RPL36A	2.20171e-43	7.38408e-39	0.746105
LINC00861	3.32956e-43	1.11667e-38	0.513161
RPL41	3.35387e-43	1.12482e-38	0.410576
RPL10A	7.89057e-43	2.64634e-38	0.579214
SELL	9.21161e-43	3.08939e-38	0.626102
RPLP2	1.55701e-42	5.22192e-38	0.491549
RPL6	3.04995e-42	1.02289e-37	0.483836
RPL7A	6.28366e-42	2.10742e-37	0.441906
RPL21	1.87388e-41	6.28461e-37	0.55526
PRMT2	2.73374e-41	9.16841e-37	0.641123
RPS2	2.79833e-41	9.38505e-37	0.565652
RPL11	3.22055e-41	1.08011e-36	0.44457
THEMIS	4.5498e-41	1.52591e-36	0.550692
LAT	1.98065e-40	6.64272e-36	0.686385
RPL12	3.86084e-40	1.29485e-35	0.487931
LTB	4.304e-40	1.44347e-35	0.75304
RPSA	2.18057e-39	7.31319e-35	0.598066
NUCB2	3.22315e-39	1.08098e-34	0.668909
IL32	4.72609e-39	1.58504e-34	0.563319
NACA	9.48537e-39	3.1812e-34	0.499577
RPL23A	4.54121e-38	1.52303e-33	0.530766
AES	5.84688e-38	1.96093e-33	0.729747
CAMK4	4.62534e-37	1.55125e-32	0.648978
SIRPG	8.33067e-37	2.79394e-32	0.418171
RPL18A	1.81907e-36	6.10079e-32	0.467961
RGS10	7.97427e-36	2.67441e-31	0.74922
TESPA1	1.07979e-35	3.6214e-31	0.457039
RPL38	1.7397e-35	5.83462e-31	0.579496
RPLP0	2.66768e-35	8.94685e-31	0.502257
RPL24	4.30051e-35	1.44231e-30	0.484267
TRAF3IP3	5.65453e-35	1.89642e-30	0.609766
TPT1	1.80399e-34	6.05023e-30	0.438171
GIMAP7	8.19961e-34	2.74998e-29	0.532664
RPL37A	1.93977e-33	6.50562e-29	0.474984
CD3G	2.44059e-33	8.18525e-29	0.529068
RPL17	2.54582e-33	8.53816e-29	0.579349
PASK	1.94202e-32	6.51316e-28	0.44289
NT5E	3.10779e-32	1.04229e-27	0.41084
RPL3	3.56217e-32	1.19468e-27	0.491014
TMEM204	4.27688e-32	1.43438e-27	0.441028
RPL4	5.07807e-32	1.70308e-27	0.578655
IL7R	1.42784e-31	4.78869e-27	0.403655
RPS9	6.17871e-31	2.07222e-26	0.425253
GIMAP1	9.36963e-31	3.14239e-26	0.453561
EIF2S3	9.6556e-31	3.23829e-26	0.572687
RPS19	2.02089e-30	6.77765e-26	0.440559
BCL11B	3.84547e-30	1.28969e-25	0.475686
LIMD2	5.23981e-29	1.75733e-24	0.619768
AC243960.1	1.37406e-28	4.60832e-24	0.526535
FYB1	1.77068e-28	5.93852e-24	0.474855
GYPC	2.3658e-27	7.93443e-23	0.595181
RACK1	1.15066e-26	3.85907e-22	0.410229
TXK	1.19633e-26	4.01226e-22	0.447128
RPS16	3.80922e-26	1.27754e-21	0.405969
HNRNPA1	4.63779e-26	1.55542e-21	0.480385
NPM1	1.04234e-25	3.49579e-21	0.483489
C12orf57	1.16729e-25	3.91485e-21	0.555073
LEPROTL1	1.5064e-25	5.05217e-21	0.500614
HCST	3.01936e-25	1.01263e-20	0.470757
PTPRCAP	3.03844e-25	1.01903e-20	0.526662
PDE3B	3.09107e-25	1.03668e-20	0.640748
GZMM	3.75837e-25	1.26048e-20	0.415207
NDFIP1	4.3296e-25	1.45206e-20	0.546184
PABPC1	5.29506e-25	1.77586e-20	0.434172
IFITM1	7.18993e-25	2.41136e-20	0.460279
TBC1D10C	1.96111e-24	6.57716e-20	0.494823
APBA2	2.9048e-24	9.74212e-20	0.351409
UQCRB	5.24492e-24	1.75904e-19	0.466654
RPS24	5.97864e-24	2.00512e-19	0.307954
CNN2	8.25239e-24	2.76769e-19	0.449961
ZAP70	1.35537e-23	4.54565e-19	0.396147
TRAC	3.05135e-23	1.02336e-18	0.408654
EVL	4.46524e-23	1.49755e-18	0.558027
RPL31	5.23467e-23	1.7556e-18	0.450281
THEM4	5.77775e-23	1.93774e-18	0.442416
2021-09-01	8.65551e-23	2.90288e-18	0.495219
SH3YL1	1.02168e-22	3.42649e-18	0.437313
KLF2	2.80906e-22	9.42102e-18	0.4414
RPL8	2.81497e-22	9.44084e-18	0.335731
NIPAL3	3.77927e-22	1.26749e-17	0.38801
PIK3IP1	5.51391e-22	1.84925e-17	0.3997
RARRES3	5.67232e-22	1.90238e-17	0.476891
RPS10	9.81846e-22	3.29291e-17	0.59212
NOP53	1.073e-21	3.59864e-17	0.468253
EIF3E	1.84004e-21	6.17114e-17	0.475379
ATM	5.6966e-21	1.91053e-16	0.455153
BIN2	7.21083e-21	2.41837e-16	0.376958
DENND2D	7.92999e-21	2.65956e-16	0.349292
ABLIM1	8.14267e-21	2.73089e-16	0.482501
RPL15	1.46971e-20	4.92912e-16	0.322206
RPS7	3.07941e-20	1.03277e-15	0.292776
ORMDL3	4.19374e-20	1.4065e-15	0.350794
RCAN3	4.89532e-20	1.64179e-15	0.448383
ITK	7.43604e-20	2.4939e-15	0.491737
ACTN1	7.94935e-20	2.66605e-15	0.299152
EEF1D	9.13286e-20	3.06298e-15	0.377138
FAU	1.33548e-19	4.47895e-15	0.280007
RPL27	2.8714e-19	9.63011e-15	0.380955
TOMM7	3.34649e-19	1.12235e-14	0.399987
RPL35	8.64186e-19	2.89831e-14	0.332667
TMC8	1.00364e-18	3.366e-14	0.420346
MCUB	1.96259e-18	6.58214e-14	0.473666
EIF2D	2.78365e-18	9.33579e-14	0.29955
CD5	3.01787e-18	1.01213e-13	0.322268
SH3BP1	3.09452e-18	1.03784e-13	0.363535
ATP6V0E2	3.97664e-18	1.33369e-13	0.398969
SLFN5	6.50653e-18	2.18216e-13	0.402178
FCMR	8.02733e-18	2.69221e-13	0.303554
CCND3	1.2037e-17	4.03695e-13	0.34715
EIF3H	1.27502e-17	4.27617e-13	0.414067
IKZF1	1.42302e-17	4.77254e-13	0.368663
ACAP1	1.54284e-17	5.17439e-13	0.421002
MGAT4A	1.80193e-17	6.04331e-13	0.411341
SCML4	1.97074e-17	6.60947e-13	0.368894
SUN2	2.86329e-17	9.60289e-13	0.428952
SFXN1	3.56319e-17	1.19502e-12	0.37986
U2AF1L4	3.9647e-17	1.32968e-12	0.377006
MYC	5.8711e-17	1.96905e-12	0.360114
BTF3	6.44656e-17	2.16205e-12	0.36
PDCD2	7.0361e-17	2.35977e-12	0.358347
ANP32B	8.38338e-17	2.81162e-12	0.455916
GPSM3	8.62891e-17	2.89396e-12	0.433485
CCDC57	8.78542e-17	2.94645e-12	0.394152
C6orf48	9.69713e-17	3.25222e-12	0.438807
RAC2	1.68688e-16	5.65745e-12	0.344945
CD2	2.26944e-16	7.61124e-12	0.30228
RPL7	2.29973e-16	7.71283e-12	0.352681
C1QBP	3.60114e-16	1.20775e-11	0.382553
RASGRP2	3.89418e-16	1.30603e-11	0.332244
LIME1	4.23941e-16	1.42181e-11	0.37291
FBXO32	4.79731e-16	1.60892e-11	0.299734
TRBC2	1.53849e-15	5.15978e-11	0.385162
TSC22D4	2.25378e-15	7.55872e-11	0.314873
MYL12A	2.31954e-15	7.77928e-11	0.288696
DGKA	2.52951e-15	8.48348e-11	0.463288
COX4I1	3.01991e-15	1.01282e-10	0.305981
2021-09-06	4.33043e-15	1.45234e-10	0.39613
TGFBR2	5.99206e-15	2.00962e-10	0.357361
CORO1A	6.28387e-15	2.10749e-10	0.331728
SNRPD2	6.78886e-15	2.27685e-10	0.359135
COX7C	6.82989e-15	2.29061e-10	0.334045
GRAMD1A	1.17345e-14	3.93551e-10	0.323018
SARAF	1.55506e-14	5.21534e-10	0.352269
UBA52	2.30999e-14	7.74725e-10	0.277543
TMC6	2.35244e-14	7.88962e-10	0.419189
NSA2	2.45059e-14	8.21878e-10	0.379896
LBH	7.20423e-14	2.41616e-09	0.4259
COMMD6	7.57962e-14	2.54205e-09	0.302944
ESYT1	9.90525e-14	3.32202e-09	0.308242
TC2N	1.19932e-13	4.02228e-09	0.300392
CDC25B	1.42767e-13	4.78811e-09	0.339929
PRKCH	3.69446e-13	1.23905e-08	0.275485
RPL13A	6.78671e-13	2.27613e-08	0.292464
RIC3	8.71567e-13	2.92306e-08	0.30064
PA2G4	9.22983e-13	3.0955e-08	0.323538
SATB1	1.36013e-12	4.5616e-08	0.372569
BIN1	1.98075e-12	6.64304e-08	0.345514
RBL2	2.06731e-12	6.93333e-08	0.405518
PIM1	2.5209e-12	8.45458e-08	0.352846
CLEC2D	3.03727e-12	1.01864e-07	0.274676
ALKBH7	3.31291e-12	1.11108e-07	0.34639
SERINC5	4.32403e-12	1.45019e-07	0.348769
IMPDH2	7.40576e-12	2.48374e-07	0.337895
FXYD5	9.08828e-12	3.04803e-07	0.290369
AAK1	9.33393e-12	3.13041e-07	0.286246
RPS20	1.0473e-11	3.51243e-07	0.314073
CD6	1.52888e-11	5.12756e-07	0.308001
FBL	2.47365e-11	8.29612e-07	0.457114
EIF3L	3.4622e-11	1.16115e-06	0.300338
FOXP1	5.57884e-11	1.87103e-06	0.313971
CRLF3	6.42585e-11	2.1551e-06	0.262183
OCIAD2	6.52547e-11	2.18851e-06	0.272921
PCBP1	8.87629e-11	2.97693e-06	0.292888
ARHGAP45	9.83593e-11	3.29877e-06	0.33732
UXT	1.25293e-10	4.20207e-06	0.309264
MAT2B	1.276e-10	4.27945e-06	0.282711
IMP3	1.68423e-10	5.64857e-06	0.270676
EEF2	2.00961e-10	6.73985e-06	0.252432
CD48	2.06457e-10	6.92416e-06	0.279866
RPS17	3.16078e-10	1.06006e-05	0.290497
DIP2A	4.38276e-10	1.46989e-05	0.256881
LAGE3	5.39158e-10	1.80823e-05	0.283005
LSM5	1.52373e-09	5.11029e-05	0.277513
UBE2D2	1.76741e-09	5.92754e-05	0.25208
GSTK1	1.93397e-09	6.48616e-05	0.262611
TNFAIP8	2.1696e-09	7.27641e-05	0.278343
ST13	4.80009e-09	0.000160985	0.265461
EIF4B	4.84217e-09	0.000162397	0.294501
APEX1	5.11115e-09	0.000171418	0.294684
RPL27A	5.68922e-09	0.000190805	0.253357
EIF3F	6.04918e-09	0.000202878	0.270016
PDCD4	8.91771e-09	0.000299082	0.301629
APRT	4.36065e-08	0.00146248	0.251018
PNISR	6.6422e-08	0.00222766	0.296069
ADD3	6.87731e-08	0.00230651	0.255416
CDC42SE2	8.91918e-08	0.00299132	0.250531
PSIP1	9.40766e-08	0.00315514	0.253832
2021-09-09	1.27533e-07	0.00427721	0.306013
HINT1	2.11739e-07	0.00710131	0.256777
RSL1D1	2.70578e-07	0.00907464	0.260954
SSR2	2.85626e-07	0.00957931	0.254887

[truncated: 11 more sheets: 11, 12, 13, 14, 15, 16, 17, 18, 19, 20, 21]
